# Supplementary material for: Genome-Wide Association Study Data Reveal Genetic Susceptibility to Chronic Inflammatory Intestinal Diseases and Pancreatic Ductal Adenocarcinoma Risk
Source: Oxford University Press journal article supplement (doi:10.1158/0008-5472.can-20-0447), 2020-07-08
Supplement: 00085472can200447-sup-237079_2_supp_6351785_qbqgfn.xlsx [file 00085472can200447-sup-237079_2_supp_6351785_qbqgfn.xlsx]

## Sheet: Supp. Table S1
	Supplementary Table S1. Single-nucleotide polymorphisms (SNPs) associated with inflammatory intestinal diseases at a P-value < 5×10-8a
	Disease group	SNP	Chr.	Position b	Mapped gene	P-value	Study title	PubMed ID
	Ulcerative colitis	rs2858829	6	116447754	DSE - CBX3P9	8.97e-09	A genome-wide association study identifies a novel locus at 6q22.1 associated with ulcerative colitis.	25082827
		rs113653754	6	32658495	HLA-DQA1 - HLA-DQB1	9.82e-87	Association analyses identify 38 susceptibility loci for inflammatory bowel disease and highlight shared genetic risk across populations.	26192919
		rs6426833	1	19845367	RNF186 - LOC105376823	3.77e-76	Association analyses identify 38 susceptibility loci for inflammatory bowel disease and highlight shared genetic risk across populations.	26192919
		rs80174646	1	67242472	IL23R	4.34e-62	Association analyses identify 38 susceptibility loci for inflammatory bowel disease and highlight shared genetic risk across populations.	26192919
		rs2836878	21	39093608	LOC107985484 - RPL23AP12	7.35e-53	Association analyses identify 38 susceptibility loci for inflammatory bowel disease and highlight shared genetic risk across populations.	26192919
		rs3024505	1	206766559	LOC105372877 - IL10	4.71e-43	Association analyses identify 38 susceptibility loci for inflammatory bowel disease and highlight shared genetic risk across populations.	26192919
		rs1801274	1	161509955	FCGR2A	1.43e-41	Association analyses identify 38 susceptibility loci for inflammatory bowel disease and highlight shared genetic risk across populations.	26192919
		rs3806308	1	19816373	RNF186 - LOC105376823	5.56e-39	Association analyses identify 38 susceptibility loci for inflammatory bowel disease and highlight shared genetic risk across populations.	26192919
		rs3197999	3	49684099	MST1	2.24e-37	Association analyses identify 38 susceptibility loci for inflammatory bowel disease and highlight shared genetic risk across populations.	26192919
		rs7134472	12	68106206	LOC107984526	5.76e-37	Association analyses identify 38 susceptibility loci for inflammatory bowel disease and highlight shared genetic risk across populations.	26192919
		rs4409764	10	99524480	LOC101927300 - LINC01475	2.13e-36	Association analyses identify 38 susceptibility loci for inflammatory bowel disease and highlight shared genetic risk across populations.	26192919
		rs7517847	1	67215986	IL23R	4.16391e-34	Association analyses identify 38 susceptibility loci for inflammatory bowel disease and highlight shared genetic risk across populations.	26192919
		rs7554511	1	200908434	C1orf106	6.83e-31	Association analyses identify 38 susceptibility loci for inflammatory bowel disease and highlight shared genetic risk across populations.	26192919
		rs75900472	9	4981601	HNRNPA1P41 - JAK2	1.04e-28	Association analyses identify 38 susceptibility loci for inflammatory bowel disease and highlight shared genetic risk across populations.	26192919
		rs56167332	5	159400761	LOC285626 - LOC285627	7.27e-27	Association analyses identify 38 susceptibility loci for inflammatory bowel disease and highlight shared genetic risk across populations.	26192919
		rs10781499	9	136371953	CARD9	4.03e-26	Association analyses identify 38 susceptibility loci for inflammatory bowel disease and highlight shared genetic risk across populations.	26192919
		rs12946510	17	39756124	GRB7 - IKZF3	1.25e-25	Association analyses identify 38 susceptibility loci for inflammatory bowel disease and highlight shared genetic risk across populations.	26192919
		rs4380874	7	107839870	PIGCP2 - LOC105375444	6.43e-25	Association analyses identify 38 susceptibility loci for inflammatory bowel disease and highlight shared genetic risk across populations.	26192919
		rs7608910	2	60977721	PUS10	1.25e-23	Association analyses identify 38 susceptibility loci for inflammatory bowel disease and highlight shared genetic risk across populations.	26192919
		rs6920220	6	137685367	LOC102723649 - LOC442263	4.78e-22	Association analyses identify 38 susceptibility loci for inflammatory bowel disease and highlight shared genetic risk across populations.	26192919
		rs7805114	7	107809588	PIGCP2, DLD	3.89465e-21	Association analyses identify 38 susceptibility loci for inflammatory bowel disease and highlight shared genetic risk across populations.	26192919
		rs2155219	11	76588150	C11orf30 - LOC101928813	7.53e-21	Association analyses identify 38 susceptibility loci for inflammatory bowel disease and highlight shared genetic risk across populations.	26192919
		rs10761659	10	62685804	ZNF365 - ALDH7A1P4	1.5e-20	Association analyses identify 38 susceptibility loci for inflammatory bowel disease and highlight shared genetic risk across populations.	26192919
		rs561722	11	114516108	NXPE2	4.19e-20	Association analyses identify 38 susceptibility loci for inflammatory bowel disease and highlight shared genetic risk across populations.	26192919
		rs10799838	1	19809329	─	2.86692e-19	Association analyses identify 38 susceptibility loci for inflammatory bowel disease and highlight shared genetic risk across populations.	26192919
		rs2816958	1	200132792	NR5A2	1.14e-18	Association analyses identify 38 susceptibility loci for inflammatory bowel disease and highlight shared genetic risk across populations.	26192919
		rs4845604	1	151829204	RORC	1.2e-18	Association analyses identify 38 susceptibility loci for inflammatory bowel disease and highlight shared genetic risk across populations.	26192919
		rs3749171	2	240630275	GPR35	4.22e-18	Association analyses identify 38 susceptibility loci for inflammatory bowel disease and highlight shared genetic risk across populations.	26192919
		rs6724516	2	240647393	─	8.39949e-18	Association analyses identify 38 susceptibility loci for inflammatory bowel disease and highlight shared genetic risk across populations.	26192919
		rs17085007	13	26957130	FGFR1OP2P1 - RPS21P8	9.72e-17	Association analyses identify 38 susceptibility loci for inflammatory bowel disease and highlight shared genetic risk across populations.	26192919
		rs4812833	20	44440356	HNF4A - LINC01430	1.87e-16	Association analyses identify 38 susceptibility loci for inflammatory bowel disease and highlight shared genetic risk across populations.	26192919
		rs7282490	21	44195858	LOC105377139 - LOC107983952	2.06e-16	Association analyses identify 38 susceptibility loci for inflammatory bowel disease and highlight shared genetic risk across populations.	26192919
		rs4246905	9	114790969	TNFSF15	1.04e-15	Association analyses identify 38 susceptibility loci for inflammatory bowel disease and highlight shared genetic risk across populations.	26192919
		rs1182188	7	2830351	GNA12	5.03e-15	Association analyses identify 38 susceptibility loci for inflammatory bowel disease and highlight shared genetic risk across populations.	26192919
		rs2413583	22	39263768	PDGFB - LOC107985575	7.09e-15	Association analyses identify 38 susceptibility loci for inflammatory bowel disease and highlight shared genetic risk across populations.	26192919
		rs3851228	6	111526988	LOC107986522, TRAF3IP2-AS1	1.13e-14	Association analyses identify 38 susceptibility loci for inflammatory bowel disease and highlight shared genetic risk across populations.	26192919
		rs10185424	2	102046427	LOC107985926 - IL1R1	1.47e-14	Association analyses identify 38 susceptibility loci for inflammatory bowel disease and highlight shared genetic risk across populations.	26192919
		rs4728142	7	128933913	LOC392787 - IRF5	1.92e-14	Association analyses identify 38 susceptibility loci for inflammatory bowel disease and highlight shared genetic risk across populations.	26192919
		rs17229285	2	198658398	LOC105373831	3.38e-14	Association analyses identify 38 susceptibility loci for inflammatory bowel disease and highlight shared genetic risk across populations.	26192919
		rs3774937	4	102513096	NFKB1	4.61e-14	Association analyses identify 38 susceptibility loci for inflammatory bowel disease and highlight shared genetic risk across populations.	26192919
		rs3766606	1	7962137	PARK7	5.5e-14	Association analyses identify 38 susceptibility loci for inflammatory bowel disease and highlight shared genetic risk across populations.	26192919
		rs941823	13	40439840	LINC00598	1.39e-13	Association analyses identify 38 susceptibility loci for inflammatory bowel disease and highlight shared genetic risk across populations.	26192919
		rs1893217	18	12809341	PTPN2	2.65e-13	Association analyses identify 38 susceptibility loci for inflammatory bowel disease and highlight shared genetic risk across populations.	26192919
		rs9868809	3	48643620	CELSR3	2.92e-13	Association analyses identify 38 susceptibility loci for inflammatory bowel disease and highlight shared genetic risk across populations.	26192919
		rs12568930	1	22375738	LOC101060363 - LOC105376856	4.4e-13	Association analyses identify 38 susceptibility loci for inflammatory bowel disease and highlight shared genetic risk across populations.	26192919
		rs9313808	5	159393836	AC008691.1	5.31979e-13	Association analyses identify 38 susceptibility loci for inflammatory bowel disease and highlight shared genetic risk across populations.	26192919
		rs17780256	17	72646784	LOC105371887, SLC39A11	6.13e-13	Association analyses identify 38 susceptibility loci for inflammatory bowel disease and highlight shared genetic risk across populations.	26192919
		rs2823286	21	15445619	LOC101927745 - CYCSP42	2.4e-12	Association analyses identify 38 susceptibility loci for inflammatory bowel disease and highlight shared genetic risk across populations.	26192919
		rs6556412	5	159360377	AC008691.1	4.31316e-12	Association analyses identify 38 susceptibility loci for inflammatory bowel disease and highlight shared genetic risk across populations.	26192919
		rs17694108	19	33240645	SLC7A10 - CEBPA	6.17e-12	Association analyses identify 38 susceptibility loci for inflammatory bowel disease and highlight shared genetic risk across populations.	26192919
		rs11554257	9	114842790	AL133412.1, TNFSF15	7.0222e-12	Association analyses identify 38 susceptibility loci for inflammatory bowel disease and highlight shared genetic risk across populations.	26192919
		rs395157	5	38867630	OSMR	8.77e-12	Association analyses identify 38 susceptibility loci for inflammatory bowel disease and highlight shared genetic risk across populations.	26192919
		rs12720356	19	10359299	TYK2	1.67e-11	Association analyses identify 38 susceptibility loci for inflammatory bowel disease and highlight shared genetic risk across populations.	26192919
		rs10995235	10	62609990	ZNF365	2.71557e-11	Association analyses identify 38 susceptibility loci for inflammatory bowel disease and highlight shared genetic risk across populations.	26192919
		rs17622378	5	132442760	C5orf56	4.42e-11	Association analyses identify 38 susceptibility loci for inflammatory bowel disease and highlight shared genetic risk across populations.	26192919
		rs11742570	5	40410482	LOC105374736 - LOC105374737	6.06e-11	Association analyses identify 38 susceptibility loci for inflammatory bowel disease and highlight shared genetic risk across populations.	26192919
		rs12942547	17	42375526	STAT3	6.72e-11	Association analyses identify 38 susceptibility loci for inflammatory bowel disease and highlight shared genetic risk across populations.	26192919
		rs12627970	22	39325740	SYNGR1, RPL3	1.02947e-10	Association analyses identify 38 susceptibility loci for inflammatory bowel disease and highlight shared genetic risk across populations.	26192919
		rs2189234	4	105154341	TET2	1.95e-10	Association analyses identify 38 susceptibility loci for inflammatory bowel disease and highlight shared genetic risk across populations.	26192919
		rs2111485	2	162254026	LOC105373724 - IFIH1	2.11e-10	Association analyses identify 38 susceptibility loci for inflammatory bowel disease and highlight shared genetic risk across populations.	26192919
		rs13300218	9	136505189	NOTCH1	2.48e-10	Association analyses identify 38 susceptibility loci for inflammatory bowel disease and highlight shared genetic risk across populations.	26192919
		rs7240004	18	48868651	CTIF - SMAD7	2.5e-10	Association analyses identify 38 susceptibility loci for inflammatory bowel disease and highlight shared genetic risk across populations.	26192919
		rs483905	11	96290263	MAML2	3.16e-10	Association analyses identify 38 susceptibility loci for inflammatory bowel disease and highlight shared genetic risk across populations.	26192919
		rs6667605	1	2571341	LOC100996583	3.16e-10	Association analyses identify 38 susceptibility loci for inflammatory bowel disease and highlight shared genetic risk across populations.	26192919
		rs11150589	16	30471173	SEPHS2 - ITGAL	3.28e-10	Association analyses identify 38 susceptibility loci for inflammatory bowel disease and highlight shared genetic risk across populations.	26192919
		rs254560	5	135107916	C5orf66	3.53e-10	Association analyses identify 38 susceptibility loci for inflammatory bowel disease and highlight shared genetic risk across populations.	26192919
		rs11641184	16	11610795	LITAF	4.24e-10	Association analyses identify 38 susceptibility loci for inflammatory bowel disease and highlight shared genetic risk across populations.	26192919
		rs7657746	4	122240464	KIAA1109	5.27e-10	Association analyses identify 38 susceptibility loci for inflammatory bowel disease and highlight shared genetic risk across populations.	26192919
		rs1405108	2	198880294	LOC105373831 - LOC100419513	5.86e-10	Association analyses identify 38 susceptibility loci for inflammatory bowel disease and highlight shared genetic risk across populations.	26192919
		rs113010081	3	46415921	LOC105377068	9.02e-10	Association analyses identify 38 susceptibility loci for inflammatory bowel disease and highlight shared genetic risk across populations.	26192919
		rs12103	1	1312114	CPSF3L	9.96e-10	Association analyses identify 38 susceptibility loci for inflammatory bowel disease and highlight shared genetic risk across populations.	26192919
		rs1517352	2	191066738	STAT4	2.1e-09	Association analyses identify 38 susceptibility loci for inflammatory bowel disease and highlight shared genetic risk across populations.	26192919
		rs4976646	5	177361569	RGS14	2.52e-09	Association analyses identify 38 susceptibility loci for inflammatory bowel disease and highlight shared genetic risk across populations.	26192919
		rs8005161	14	88006251	GPR65	2.8e-09	Association analyses identify 38 susceptibility loci for inflammatory bowel disease and highlight shared genetic risk across populations.	26192919
		rs4656958	1	160887174	ITLN1 - LOC646347	2.82e-09	Association analyses identify 38 susceptibility loci for inflammatory bowel disease and highlight shared genetic risk across populations.	26192919
		rs4743820	9	91166134	LINC00484	4.05e-09	Association analyses identify 38 susceptibility loci for inflammatory bowel disease and highlight shared genetic risk across populations.	26192919
		rs1077773	7	17403055	LOC102659288	5.96e-09	Association analyses identify 38 susceptibility loci for inflammatory bowel disease and highlight shared genetic risk across populations.	26192919
		rs907611	11	1852842	LOC107984299 - LSP1	1e-08	Association analyses identify 38 susceptibility loci for inflammatory bowel disease and highlight shared genetic risk across populations.	26192919
		rs6062504	20	63717555	ZGPAT	1.19e-08	Association analyses identify 38 susceptibility loci for inflammatory bowel disease and highlight shared genetic risk across populations.	26192919
		rs11229555	11	58641214	ZFP91-CNTF - GLYAT	1.21e-08	Association analyses identify 38 susceptibility loci for inflammatory bowel disease and highlight shared genetic risk across populations.	26192919
		rs913678	20	50338887	LINC01271 - LOC105372657	1.23e-08	Association analyses identify 38 susceptibility loci for inflammatory bowel disease and highlight shared genetic risk across populations.	26192919
		rs12718244	7	50136058	C7orf72	1.41e-08	Association analyses identify 38 susceptibility loci for inflammatory bowel disease and highlight shared genetic risk across populations.	26192919
		rs7404095	16	23853269	PRKCB	1.52e-08	Association analyses identify 38 susceptibility loci for inflammatory bowel disease and highlight shared genetic risk across populations.	26192919
		rs2382817	2	218286495	PNKD, TMBIM1	1.54e-08	Association analyses identify 38 susceptibility loci for inflammatory bowel disease and highlight shared genetic risk across populations.	26192919
		rs11230563	11	61008737	CD6	1.9e-08	Association analyses identify 38 susceptibility loci for inflammatory bowel disease and highlight shared genetic risk across populations.	26192919
		rs11010067	10	35006503	LOC105376491 - CUL2	2.05e-08	Association analyses identify 38 susceptibility loci for inflammatory bowel disease and highlight shared genetic risk across populations.	26192919
		rs111781203	2	227795396	─	2.85879e-08	Association analyses identify 38 susceptibility loci for inflammatory bowel disease and highlight shared genetic risk across populations.	26192919
		rs11083840	19	46616653	CYTH1	4.34e-08	Association analyses identify 38 susceptibility loci for inflammatory bowel disease and highlight shared genetic risk across populations.	26192919
		rs17736589	17	78741036	KIR3DL2 - RNU6-222P	4.5e-08	Association analyses identify 38 susceptibility loci for inflammatory bowel disease and highlight shared genetic risk across populations.	26192919
		rs4654925	1	19901230	OTUD3	8.1e-17	Genome-wide association study for ulcerative colitis identifies risk loci at 7q22 and 22q13 (IL17REL).	20228798
		rs9268923	6	32465058	HLA-DRB9 - HLA-DRB5	4.1e-15	Genome-wide association study for ulcerative colitis identifies risk loci at 7q22 and 22q13 (IL17REL).	20228798
		rs7809799	7	99162881	KPNA7	8.81e-11	Genome-wide association study for ulcerative colitis identifies risk loci at 7q22 and 22q13 (IL17REL).	20228798
		rs3024493	1	206770623	IL10	1.3e-08	Genome-wide association study for ulcerative colitis identifies risk loci at 7q22 and 22q13 (IL17REL).	20228798
		rs886774	7	107854989	PIGCP2 - LOC105375444	3e-08	Genome-wide association study of ulcerative colitis identifies three new susceptibility loci, including the HNF4A region.	19915572
		rs6927022	6	32644620	HLA-DQA1	4.71e-133	Host-microbe interactions have shaped the genetic architecture of inflammatory bowel disease.	23128233
		rs6017342	20	44436388	HNF4A - LINC01430	1.43e-43	Host-microbe interactions have shaped the genetic architecture of inflammatory bowel disease.	23128233
		rs798502	7	2750246	GNA12, AMZ1	6.09e-17	Host-microbe interactions have shaped the genetic architecture of inflammatory bowel disease.	23128233
		rs10797432	1	2569899	LOC100996583	2.62e-12	Host-microbe interactions have shaped the genetic architecture of inflammatory bowel disease.	23128233
		rs3774959	4	102589957	NFKB1	3.66e-12	Host-microbe interactions have shaped the genetic architecture of inflammatory bowel disease.	23128233
		rs7210086	17	72645559	LOC105371887	1.89e-09	Host-microbe interactions have shaped the genetic architecture of inflammatory bowel disease.	23128233
		rs1126510	19	46620526	PTGIR	1.18e-08	Host-microbe interactions have shaped the genetic architecture of inflammatory bowel disease.	23128233
		rs11739663	5	593968	LOC105374607 - LOC105374608	1.81e-08	Host-microbe interactions have shaped the genetic architecture of inflammatory bowel disease.	23128233
		rs4722672	7	27192143	HOXA11-AS - HOXA13	2.06e-08	Host-microbe interactions have shaped the genetic architecture of inflammatory bowel disease.	23128233
		rs6088765	20	35211477	PROCR	2.21e-08	Host-microbe interactions have shaped the genetic architecture of inflammatory bowel disease.	23128233
		rs1016883	2	198016944	PLCL1	2.87e-08	Host-microbe interactions have shaped the genetic architecture of inflammatory bowel disease.	23128233
		rs1728785	16	68557327	ZFP90	3.71e-08	Host-microbe interactions have shaped the genetic architecture of inflammatory bowel disease.	23128233
		rs9268853	6	32461866	HLA-DRB9 - HLA-DRB5	1.35e-55	Meta-analysis identifies 29 additional ulcerative colitis risk loci, increasing the number of confirmed associations to 47.	21297633
		rs11209026	1	67240275	IL23R	5.12e-28	Meta-analysis identifies 29 additional ulcerative colitis risk loci, increasing the number of confirmed associations to 47.	21297633
		rs10758669	9	4981602	HNRNPA1P41 - JAK2	2.22e-25	Meta-analysis identifies 29 additional ulcerative colitis risk loci, increasing the number of confirmed associations to 47.	21297633
		rs6871626	5	159399784	LOC285626 - LOC285627	1.11e-21	Meta-analysis identifies 29 additional ulcerative colitis risk loci, increasing the number of confirmed associations to 47.	21297633
		rs6584283	10	99530544	LINC01475	8.46e-21	Meta-analysis identifies 29 additional ulcerative colitis risk loci, increasing the number of confirmed associations to 47.	21297633
		rs16940202	16	85980635	LOC105371388 - LOC105371389	5.96e-19	Meta-analysis identifies 29 additional ulcerative colitis risk loci, increasing the number of confirmed associations to 47.	21297633
		rs9822268	3	49682296	APEH	1.6e-17	Meta-analysis identifies 29 additional ulcerative colitis risk loci, increasing the number of confirmed associations to 47.	21297633
		rs7134599	12	68106295	LOC107984526	1.06e-16	Meta-analysis identifies 29 additional ulcerative colitis risk loci, increasing the number of confirmed associations to 47.	21297633
		rs4510766	7	107852344	PIGCP2 - LOC105375444	2e-16	Meta-analysis identifies 29 additional ulcerative colitis risk loci, increasing the number of confirmed associations to 47.	21297633
		rs678170	11	114561234	NXPE2	4.65e-14	Meta-analysis identifies 29 additional ulcerative colitis risk loci, increasing the number of confirmed associations to 47.	21297633
		rs7524102	1	22371954	LOC101060363 - LOC105376856	1.65e-13	Meta-analysis identifies 29 additional ulcerative colitis risk loci, increasing the number of confirmed associations to 47.	21297633
		rs1297265	21	15444732	LOC101927745	6.99e-13	Meta-analysis identifies 29 additional ulcerative colitis risk loci, increasing the number of confirmed associations to 47.	21297633
		rs2310173	2	102047167	LOC107985926 - IL1R1	3.17e-12	Meta-analysis identifies 29 additional ulcerative colitis risk loci, increasing the number of confirmed associations to 47.	21297633
		rs267939	5	10752203	DAP	6.01e-12	Meta-analysis identifies 29 additional ulcerative colitis risk loci, increasing the number of confirmed associations to 47.	21297633
		rs2872507	17	39884510	ZPBP2 - GSDMB	5.44e-11	Meta-analysis identifies 29 additional ulcerative colitis risk loci, increasing the number of confirmed associations to 47.	21297633
		rs2838519	21	44195140	LOC105377139 - LOC107983952	6.41e-11	Meta-analysis identifies 29 additional ulcerative colitis risk loci, increasing the number of confirmed associations to 47.	21297633
		rs4676406	2	240639691	GPR35 - LOC100420500	8.32e-11	Meta-analysis identifies 29 additional ulcerative colitis risk loci, increasing the number of confirmed associations to 47.	21297633
		rs11676348	2	218145423	CXCR2 - CXCR1	1.25e-10	Meta-analysis identifies 29 additional ulcerative colitis risk loci, increasing the number of confirmed associations to 47.	21297633
		rs2297441	20	63696229	RTEL1-TNFRSF6B, RTEL1	1.7e-10	Meta-analysis identifies 29 additional ulcerative colitis risk loci, increasing the number of confirmed associations to 47.	21297633
		rs943072	6	43828231	LOC105375070 - LOC107986598	2.37e-10	Meta-analysis identifies 29 additional ulcerative colitis risk loci, increasing the number of confirmed associations to 47.	21297633
		rs12261843	10	35265126	CCNY	7.09e-10	Meta-analysis identifies 29 additional ulcerative colitis risk loci, increasing the number of confirmed associations to 47.	21297633
		rs6451493	5	40410833	LOC105374736 - LOC105374737	2.8e-09	Meta-analysis identifies 29 additional ulcerative colitis risk loci, increasing the number of confirmed associations to 47.	21297633
		rs734999	1	2581777	LOC100996583	3.34e-09	Meta-analysis identifies 29 additional ulcerative colitis risk loci, increasing the number of confirmed associations to 47.	21297633
		rs35675666	1	7961913	PARK7	4.84e-09	Meta-analysis identifies 29 additional ulcerative colitis risk loci, increasing the number of confirmed associations to 47.	21297633
		rs6911490	6	106074152	PRDM1	1.01e-08	Meta-analysis identifies 29 additional ulcerative colitis risk loci, increasing the number of confirmed associations to 47.	21297633
		rs6499188	16	68640885	ZFP90 - CDH3	3.97e-08	Meta-analysis identifies 29 additional ulcerative colitis risk loci, increasing the number of confirmed associations to 47.	21297633
		rs3194051	5	35876172	IL7R	4.22e-08	Meta-analysis identifies 29 additional ulcerative colitis risk loci, increasing the number of confirmed associations to 47.	21297633
		rs9268877	6	32463370	HLA-DRB9 - HLA-DRB5	6.48e-18	Sequence variants in IL10, ARPC2 and multiple other loci contribute to ulcerative colitis susceptibility.	18836448
		rs1811711	2	227805760	LOC100533842 - CCL20	6.09e-09	Genome-wide association study implicates immune activation of multiple integrin genes in inflammatory bowel disease.	28067908
		rs113986290	6	19780778	LOC100506885	7.59e-09	Genome-wide association study implicates immune activation of multiple integrin genes in inflammatory bowel disease.	28067908
		rs17656349	5	150226431	CAMK2A	1.54e-08	Genome-wide association study implicates immune activation of multiple integrin genes in inflammatory bowel disease.	28067908
		rs7911117	10	26890667	ABI1 - LINC00202-1	1.84e-08	Genome-wide association study implicates immune activation of multiple integrin genes in inflammatory bowel disease.	28067908
		rs138788	22	35333728	TOM1	2.95e-08	Genome-wide association study implicates immune activation of multiple integrin genes in inflammatory bowel disease.	28067908
	Crohn's disease	rs4820425	22	41035338	RBX1 - RPS9P2	3.42e-08	A genome-wide association study on a southern European population identifies a new Crohn's disease susceptibility locus at RBX1-EP300.	22936669
		rs7517847	1	67215986	IL23R	1.38e-159	Association analyses identify 38 susceptibility loci for inflammatory bowel disease and highlight shared genetic risk across populations.	26192919
		rs80174646	1	67242472	IL23R	5.79913e-149	Association analyses identify 38 susceptibility loci for inflammatory bowel disease and highlight shared genetic risk across populations.	26192919
		rs11742570	5	40410482	LOC105374736 - LOC105374737	3.66e-87	Association analyses identify 38 susceptibility loci for inflammatory bowel disease and highlight shared genetic risk across populations.	26192919
		rs12994997	2	233264857	ATG16L1	1.36746e-77	Association analyses identify 38 susceptibility loci for inflammatory bowel disease and highlight shared genetic risk across populations.	26192919
		rs17622378	5	132442760	C5orf56	7.17e-56	Association analyses identify 38 susceptibility loci for inflammatory bowel disease and highlight shared genetic risk across populations.	26192919
		rs10761659	10	62685804	ZNF365 - ALDH7A1P4	1.4e-49	Association analyses identify 38 susceptibility loci for inflammatory bowel disease and highlight shared genetic risk across populations.	26192919
		rs1505992	5	40498475	AC114977.1	1.51014e-49	Association analyses identify 38 susceptibility loci for inflammatory bowel disease and highlight shared genetic risk across populations.	26192919
		rs4409764	10	99524480	LOC101927300 - LINC01475	6.06e-47	Association analyses identify 38 susceptibility loci for inflammatory bowel disease and highlight shared genetic risk across populations.	26192919
		rs2155219	11	76588150	C11orf30 - LOC101928813	6.47e-46	Association analyses identify 38 susceptibility loci for inflammatory bowel disease and highlight shared genetic risk across populations.	26192919
		rs11741861	5	150898347	ZNF300, IRGM	5.88e-44	Association analyses identify 38 susceptibility loci for inflammatory bowel disease and highlight shared genetic risk across populations.	26192919
		rs10781499	9	136371953	CARD9	8.2e-43	Association analyses identify 38 susceptibility loci for inflammatory bowel disease and highlight shared genetic risk across populations.	26192919
		rs56167332	5	159400761	LOC285626 - LOC285627	2.29e-41	Association analyses identify 38 susceptibility loci for inflammatory bowel disease and highlight shared genetic risk across populations.	26192919
		rs2413583	22	39263768	PDGFB - LOC107985575	7.72e-36	Association analyses identify 38 susceptibility loci for inflammatory bowel disease and highlight shared genetic risk across populations.	26192919
		rs75900472	9	4981601	HNRNPA1P41 - JAK2	4.18e-34	Association analyses identify 38 susceptibility loci for inflammatory bowel disease and highlight shared genetic risk across populations.	26192919
		rs6556412	5	159360377	AC008691.1	5.5285e-34	Association analyses identify 38 susceptibility loci for inflammatory bowel disease and highlight shared genetic risk across populations.	26192919
		rs3197999	3	49684099	MST1	2.05e-33	Association analyses identify 38 susceptibility loci for inflammatory bowel disease and highlight shared genetic risk across populations.	26192919
		rs116392568	6	31306603	LOC105375015	6.78e-32	Association analyses identify 38 susceptibility loci for inflammatory bowel disease and highlight shared genetic risk across populations.	26192919
		rs11743851	5	131277907	CDC42SE2	1.4e-31	Association analyses identify 38 susceptibility loci for inflammatory bowel disease and highlight shared genetic risk across populations.	26192919
		rs7554511	1	200908434	C1orf106	2.09e-27	Association analyses identify 38 susceptibility loci for inflammatory bowel disease and highlight shared genetic risk across populations.	26192919
		rs11010067	10	35006503	LOC105376491 - CUL2	1.38e-26	Association analyses identify 38 susceptibility loci for inflammatory bowel disease and highlight shared genetic risk across populations.	26192919
		rs224090	10	62781559	ALDH7A1P4 - ADO	3.85e-26	Association analyses identify 38 susceptibility loci for inflammatory bowel disease and highlight shared genetic risk across populations.	26192919
		rs6588248	1	67187301	IL23R	1.65555e-25	Association analyses identify 38 susceptibility loci for inflammatory bowel disease and highlight shared genetic risk across populations.	26192919
		rs12422544	12	40134630	SLC2A13 - LOC101930164	3.78e-25	Association analyses identify 38 susceptibility loci for inflammatory bowel disease and highlight shared genetic risk across populations.	26192919
		rs3024505	1	206766559	LOC105372877 - IL10	3.95e-25	Association analyses identify 38 susceptibility loci for inflammatory bowel disease and highlight shared genetic risk across populations.	26192919
		rs1893217	18	12809341	PTPN2	5.5e-25	Association analyses identify 38 susceptibility loci for inflammatory bowel disease and highlight shared genetic risk across populations.	26192919
		rs2024092	19	1124032	SBNO2	7.12e-25	Association analyses identify 38 susceptibility loci for inflammatory bowel disease and highlight shared genetic risk across populations.	26192919
		rs3091315	17	34266646	CCL2 - CCL7	8e-25	Association analyses identify 38 susceptibility loci for inflammatory bowel disease and highlight shared genetic risk across populations.	26192919
		rs2823286	21	15445619	LOC101927745 - CYCSP42	1.21e-24	Association analyses identify 38 susceptibility loci for inflammatory bowel disease and highlight shared genetic risk across populations.	26192919
		rs12946510	17	39756124	GRB7 - IKZF3	1.97e-24	Association analyses identify 38 susceptibility loci for inflammatory bowel disease and highlight shared genetic risk across populations.	26192919
		rs3764147	13	43883789	LACC1	3.17447e-24	Association analyses identify 38 susceptibility loci for inflammatory bowel disease and highlight shared genetic risk across populations.	26192919
		rs7608910	2	60977721	PUS10	2.95e-23	Association analyses identify 38 susceptibility loci for inflammatory bowel disease and highlight shared genetic risk across populations.	26192919
		rs7746082	6	105987394	RN7SKP211 - PRDM1	3.18e-23	Association analyses identify 38 susceptibility loci for inflammatory bowel disease and highlight shared genetic risk across populations.	26192919
		rs7282490	21	44195858	LOC105377139 - LOC107983952	5.98e-23	Association analyses identify 38 susceptibility loci for inflammatory bowel disease and highlight shared genetic risk across populations.	26192919
		rs4246905	9	114790969	TNFSF15	6.81e-23	Association analyses identify 38 susceptibility loci for inflammatory bowel disease and highlight shared genetic risk across populations.	26192919
		rs26528	16	28506388	IL27	1.29e-22	Association analyses identify 38 susceptibility loci for inflammatory bowel disease and highlight shared genetic risk across populations.	26192919
		rs7517810	1	172884320	AL031599.1	4.52793e-22	Association analyses identify 38 susceptibility loci for inflammatory bowel disease and highlight shared genetic risk across populations.	26192919
		rs13407913	2	24874775	ADCY3	9.64e-22	Association analyses identify 38 susceptibility loci for inflammatory bowel disease and highlight shared genetic risk across populations.	26192919
		rs921720	8	125522429	TRIB1 - LOC105375746	1.12e-21	Association analyses identify 38 susceptibility loci for inflammatory bowel disease and highlight shared genetic risk across populations.	26192919
		rs13300483	9	114881082	DEC1	1.69963e-21	Association analyses identify 38 susceptibility loci for inflammatory bowel disease and highlight shared genetic risk across populations.	26192919
		rs1260326	2	27508073	GCKR	1.74377e-21	Association analyses identify 38 susceptibility loci for inflammatory bowel disease and highlight shared genetic risk across populations.	26192919
		rs4768236	12	40362670	LOC105369736, LRRK2	4.05e-21	Association analyses identify 38 susceptibility loci for inflammatory bowel disease and highlight shared genetic risk across populations.	26192919
		rs516246	19	48702915	FUT2, LOC105447645	1.33e-20	Association analyses identify 38 susceptibility loci for inflammatory bowel disease and highlight shared genetic risk across populations.	26192919
		rs17293632	15	67150258	SMAD3	3.7e-20	Association analyses identify 38 susceptibility loci for inflammatory bowel disease and highlight shared genetic risk across populations.	26192919
		rs2945412	17	27516617	KSR1	4.51e-20	Association analyses identify 38 susceptibility loci for inflammatory bowel disease and highlight shared genetic risk across populations.	26192919
		rs11879191	19	10402235	CDC37	4.81e-20	Association analyses identify 38 susceptibility loci for inflammatory bowel disease and highlight shared genetic risk across populations.	26192919
		rs1819333	6	166960059	RNASET2 - LOC105378120	1.62e-19	Association analyses identify 38 susceptibility loci for inflammatory bowel disease and highlight shared genetic risk across populations.	26192919
		rs1250546	10	79272775	ZMIZ1	3.07e-19	Association analyses identify 38 susceptibility loci for inflammatory bowel disease and highlight shared genetic risk across populations.	26192919
		rs9313808	5	159393836	AC008691.1	1.94779e-18	Association analyses identify 38 susceptibility loci for inflammatory bowel disease and highlight shared genetic risk across populations.	26192919
		rs7097656	10	80491075	TSPAN14	3.89e-18	Association analyses identify 38 susceptibility loci for inflammatory bowel disease and highlight shared genetic risk across populations.	26192919
		rs6716753	2	230232414	SP140	1.98256e-17	Association analyses identify 38 susceptibility loci for inflammatory bowel disease and highlight shared genetic risk across populations.	26192919
		rs6679677	1	113761186	PHTF1, RSBN1	4.66639e-17	Association analyses identify 38 susceptibility loci for inflammatory bowel disease and highlight shared genetic risk across populations.	26192919
		rs2284553	21	33404389	IFNGR2	5.63e-17	Association analyses identify 38 susceptibility loci for inflammatory bowel disease and highlight shared genetic risk across populations.	26192919
		rs6062504	20	63717555	ZGPAT	7.51e-17	Association analyses identify 38 susceptibility loci for inflammatory bowel disease and highlight shared genetic risk across populations.	26192919
		rs12942547	17	42375526	STAT3	1.01e-16	Association analyses identify 38 susceptibility loci for inflammatory bowel disease and highlight shared genetic risk across populations.	26192919
		rs925255	2	28391927	FLJ31356	1.07e-16	Association analyses identify 38 susceptibility loci for inflammatory bowel disease and highlight shared genetic risk across populations.	26192919
		rs11554257	9	114842790	AL133412.1, TNFSF15	1.23048e-16	Association analyses identify 38 susceptibility loci for inflammatory bowel disease and highlight shared genetic risk across populations.	26192919
		rs212388	6	159069404	LOC105378083	1.8e-16	Association analyses identify 38 susceptibility loci for inflammatory bowel disease and highlight shared genetic risk across populations.	26192919
		rs1842076	5	40236916	KRT18P56 - RNU1-150P	1.98e-16	Association analyses identify 38 susceptibility loci for inflammatory bowel disease and highlight shared genetic risk across populations.	26192919
		rs395157	5	38867630	OSMR	2.36e-16	Association analyses identify 38 susceptibility loci for inflammatory bowel disease and highlight shared genetic risk across populations.	26192919
		rs6708413	2	102446909	IL18RAP	2.82e-16	Association analyses identify 38 susceptibility loci for inflammatory bowel disease and highlight shared genetic risk across populations.	26192919
		rs6651252	8	128554935	LINC00824	3.86e-16	Association analyses identify 38 susceptibility loci for inflammatory bowel disease and highlight shared genetic risk across populations.	26192919
		rs1363907	5	96917099	ERAP1, ERAP2	3.89e-16	Association analyses identify 38 susceptibility loci for inflammatory bowel disease and highlight shared genetic risk across populations.	26192919
		rs13300218	9	136505189	NOTCH1	7.32e-16	Association analyses identify 38 susceptibility loci for inflammatory bowel disease and highlight shared genetic risk across populations.	26192919
		rs71559680	6	21430497	CDKAL1 - LINC00581	1.78e-15	Association analyses identify 38 susceptibility loci for inflammatory bowel disease and highlight shared genetic risk across populations.	26192919
		rs13204742	6	127924620	THEMIS, PTPRK	3.24323e-15	Association analyses identify 38 susceptibility loci for inflammatory bowel disease and highlight shared genetic risk across populations.	26192919
		rs2836878	21	39093608	LOC107985484 - RPL23AP12	4.61e-15	Association analyses identify 38 susceptibility loci for inflammatory bowel disease and highlight shared genetic risk across populations.	26192919
		rs2488389	1	197662011	DENND1B	8.59e-15	Association analyses identify 38 susceptibility loci for inflammatory bowel disease and highlight shared genetic risk across populations.	26192919
		rs13126505	4	101944147	BANK1	1.57134e-14	Association analyses identify 38 susceptibility loci for inflammatory bowel disease and highlight shared genetic risk across populations.	26192919
		rs423674	16	11279548	LOC105371082	1.65e-14	Association analyses identify 38 susceptibility loci for inflammatory bowel disease and highlight shared genetic risk across populations.	26192919
		rs1292053	17	59886176	TUBD1	1.75e-14	Association analyses identify 38 susceptibility loci for inflammatory bowel disease and highlight shared genetic risk across populations.	26192919
		rs6863411	5	142133639	NDFIP1	1.87e-14	Association analyses identify 38 susceptibility loci for inflammatory bowel disease and highlight shared genetic risk across populations.	26192919
		rs2361755	16	85976080	LOC105371388 - LOC105371389	6.06e-14	Association analyses identify 38 susceptibility loci for inflammatory bowel disease and highlight shared genetic risk across populations.	26192919
		rs4256159	3	18725912	LOC105376976	7.01e-14	Association analyses identify 38 susceptibility loci for inflammatory bowel disease and highlight shared genetic risk across populations.	26192919
		rs8005161	14	88006251	GPR65	8.88e-14	Association analyses identify 38 susceptibility loci for inflammatory bowel disease and highlight shared genetic risk across populations.	26192919
		rs1456896	7	50264865	C7orf72 - IKZF1	1.03e-13	Association analyses identify 38 susceptibility loci for inflammatory bowel disease and highlight shared genetic risk across populations.	26192919
		rs12627970	22	39325740	SYNGR1, RPL3	1.39375e-13	Association analyses identify 38 susceptibility loci for inflammatory bowel disease and highlight shared genetic risk across populations.	26192919
		rs113653754	6	32658495	HLA-DQA1 - HLA-DQB1	2.18e-13	Association analyses identify 38 susceptibility loci for inflammatory bowel disease and highlight shared genetic risk across populations.	26192919
		rs10495903	2	43579779	THADA	3.44e-13	Association analyses identify 38 susceptibility loci for inflammatory bowel disease and highlight shared genetic risk across populations.	26192919
		rs2227551	10	73909432	PLAU	4.72e-13	Association analyses identify 38 susceptibility loci for inflammatory bowel disease and highlight shared genetic risk across populations.	26192919
		rs5763767	22	30097893	HORMAD2	6.45e-13	Association analyses identify 38 susceptibility loci for inflammatory bowel disease and highlight shared genetic risk across populations.	26192919
		rs12722515	10	6039267	IL2RA	8.02e-13	Association analyses identify 38 susceptibility loci for inflammatory bowel disease and highlight shared genetic risk across populations.	26192919
		rs2930047	5	10695414	DAP	1.21e-12	Association analyses identify 38 susceptibility loci for inflammatory bowel disease and highlight shared genetic risk across populations.	26192919
		rs6740462	2	65440138	SPRED2 - LOC105374780	1.74e-12	Association analyses identify 38 susceptibility loci for inflammatory bowel disease and highlight shared genetic risk across populations.	26192919
		rs174537	11	61785208	MYRF	1.92e-12	Association analyses identify 38 susceptibility loci for inflammatory bowel disease and highlight shared genetic risk across populations.	26192919
		rs6074022	20	46111557	RPL13P2 - CD40	2.7e-12	Association analyses identify 38 susceptibility loci for inflammatory bowel disease and highlight shared genetic risk across populations.	26192919
		rs10051722	5	130768383	ARL2BPP4 - LOC107986449	3.99e-12	Association analyses identify 38 susceptibility loci for inflammatory bowel disease and highlight shared genetic risk across populations.	26192919
		rs6908425	6	20728500	CDKAL1	4.81e-12	Association analyses identify 38 susceptibility loci for inflammatory bowel disease and highlight shared genetic risk across populations.	26192919
		rs2256609	22	21570728	UBE2L3	6.14e-12	Association analyses identify 38 susceptibility loci for inflammatory bowel disease and highlight shared genetic risk across populations.	26192919
		rs4802307	19	46346549	HIF3A - PPP5C	9.04e-12	Association analyses identify 38 susceptibility loci for inflammatory bowel disease and highlight shared genetic risk across populations.	26192919
		rs10486483	7	26852821	SKAP2	1.55e-11	Association analyses identify 38 susceptibility loci for inflammatory bowel disease and highlight shared genetic risk across populations.	26192919
		rs72810983	5	173891251	CPEB4	2.24102e-11	Association analyses identify 38 susceptibility loci for inflammatory bowel disease and highlight shared genetic risk across populations.	26192919
		rs16967103	15	38606989	RASGRP1, C15orf53	2.98109e-11	Association analyses identify 38 susceptibility loci for inflammatory bowel disease and highlight shared genetic risk across populations.	26192919
		rs12720356	19	10359299	TYK2	3.39e-11	Association analyses identify 38 susceptibility loci for inflammatory bowel disease and highlight shared genetic risk across populations.	26192919
		rs7438704	4	48361228	SLAIN2	3.42e-11	Association analyses identify 38 susceptibility loci for inflammatory bowel disease and highlight shared genetic risk across populations.	26192919
		rs11681525	2	144734815	TEX41	4.08e-11	Association analyses identify 38 susceptibility loci for inflammatory bowel disease and highlight shared genetic risk across populations.	26192919
		rs11230563	11	61008737	CD6	4.23e-11	Association analyses identify 38 susceptibility loci for inflammatory bowel disease and highlight shared genetic risk across populations.	26192919
		rs12718244	7	50136058	C7orf72	4.62e-11	Association analyses identify 38 susceptibility loci for inflammatory bowel disease and highlight shared genetic risk across populations.	26192919
		rs1199103	10	58187470	MRPS35P3 - IPMK	5.32e-11	Association analyses identify 38 susceptibility loci for inflammatory bowel disease and highlight shared genetic risk across populations.	26192919
		rs1569328	14	75275048	LOC105370571 - FOS	6.47e-11	Association analyses identify 38 susceptibility loci for inflammatory bowel disease and highlight shared genetic risk across populations.	26192919
		rs1801274	1	161509955	FCGR2A	9.47e-11	Association analyses identify 38 susceptibility loci for inflammatory bowel disease and highlight shared genetic risk across populations.	26192919
		rs9358372	6	20812357	CDKAL1	1.04736e-10	Association analyses identify 38 susceptibility loci for inflammatory bowel disease and highlight shared genetic risk across populations.	26192919
		rs10061469	5	73222321	AC116345.1	1.07524e-10	Association analyses identify 38 susceptibility loci for inflammatory bowel disease and highlight shared genetic risk across populations.	26192919
		rs1847472	6	90263440	BACH2	1.09e-10	Association analyses identify 38 susceptibility loci for inflammatory bowel disease and highlight shared genetic risk across populations.	26192919
		rs3742130	13	99255087	UBAC2, GPR18	1.16e-10	Association analyses identify 38 susceptibility loci for inflammatory bowel disease and highlight shared genetic risk across populations.	26192919
		rs3853824	17	56803632	C17orf67	1.17e-10	Association analyses identify 38 susceptibility loci for inflammatory bowel disease and highlight shared genetic risk across populations.	26192919
		rs1517352	2	191066738	STAT4	1.31e-10	Association analyses identify 38 susceptibility loci for inflammatory bowel disease and highlight shared genetic risk across populations.	26192919
		rs7555082	1	198629533	ATP6V1G3 - PTPRC	1.47e-10	Association analyses identify 38 susceptibility loci for inflammatory bowel disease and highlight shared genetic risk across populations.	26192919
		rs727563	22	41471373	ACO2	1.88e-10	Association analyses identify 38 susceptibility loci for inflammatory bowel disease and highlight shared genetic risk across populations.	26192919
		rs11641184	16	11610795	LITAF	3.08e-10	Association analyses identify 38 susceptibility loci for inflammatory bowel disease and highlight shared genetic risk across populations.	26192919
		rs559928	11	64382898	RPS6KA4 - LOC107984366	3.75e-10	Association analyses identify 38 susceptibility loci for inflammatory bowel disease and highlight shared genetic risk across populations.	26192919
		rs10865331	2	62324337	LOC105374761 - LOC105374764	4.4e-10	Association analyses identify 38 susceptibility loci for inflammatory bowel disease and highlight shared genetic risk across populations.	26192919
		rs7015630	8	89863690	COX6B1P6 - RNU6-925P	9e-10	Association analyses identify 38 susceptibility loci for inflammatory bowel disease and highlight shared genetic risk across populations.	26192919
		rs2641348	1	119895261	ADAM30	9.65e-10	Association analyses identify 38 susceptibility loci for inflammatory bowel disease and highlight shared genetic risk across populations.	26192919
		rs35320439	2	241797926	GAL3ST2	9.89e-10	Association analyses identify 38 susceptibility loci for inflammatory bowel disease and highlight shared genetic risk across populations.	26192919
		rs9868809	3	48643620	CELSR3	9.9e-10	Association analyses identify 38 susceptibility loci for inflammatory bowel disease and highlight shared genetic risk across populations.	26192919
		rs2538470	7	148523356	LOC392145 - RPL32P17	1.05e-09	Association analyses identify 38 susceptibility loci for inflammatory bowel disease and highlight shared genetic risk across populations.	26192919
		rs7773324	6	382559	DUSP22 - IRF4	1.06e-09	Association analyses identify 38 susceptibility loci for inflammatory bowel disease and highlight shared genetic risk across populations.	26192919
		rs10065637	5	56143024	ANKRD55	1.18833e-09	Association analyses identify 38 susceptibility loci for inflammatory bowel disease and highlight shared genetic risk across populations.	26192919
		rs7954567	12	6381959	LTBR	1.3e-09	Association analyses identify 38 susceptibility loci for inflammatory bowel disease and highlight shared genetic risk across populations.	26192919
		rs9525625	13	42443894	LOC105370177	1.41e-09	Association analyses identify 38 susceptibility loci for inflammatory bowel disease and highlight shared genetic risk across populations.	26192919
		rs1042058	10	30439172	MAP3K8	1.6e-09	Association analyses identify 38 susceptibility loci for inflammatory bowel disease and highlight shared genetic risk across populations.	26192919
		rs864745	7	28140937	JAZF1	1.82463e-09	Association analyses identify 38 susceptibility loci for inflammatory bowel disease and highlight shared genetic risk across populations.	26192919
		rs259964	20	59249254	ZNF831	2.08e-09	Association analyses identify 38 susceptibility loci for inflammatory bowel disease and highlight shared genetic risk across populations.	26192919
		rs7657746	4	122240464	KIAA1109	2.39e-09	Association analyses identify 38 susceptibility loci for inflammatory bowel disease and highlight shared genetic risk across populations.	26192919
		rs17391694	1	78157942	LOC107984997 - RNFT1P2	2.62e-09	Association analyses identify 38 susceptibility loci for inflammatory bowel disease and highlight shared genetic risk across populations.	26192919
		rs10185424	2	102046427	LOC107985926 - IL1R1	2.76e-09	Association analyses identify 38 susceptibility loci for inflammatory bowel disease and highlight shared genetic risk across populations.	26192919
		rs17694108	19	33240645	SLC7A10 - CEBPA	3.29e-09	Association analyses identify 38 susceptibility loci for inflammatory bowel disease and highlight shared genetic risk across populations.	26192919
		rs2382817	2	218286495	PNKD, TMBIM1	3.79e-09	Association analyses identify 38 susceptibility loci for inflammatory bowel disease and highlight shared genetic risk across populations.	26192919
		rs10798069	1	186906327	PLA2G4A	4.25e-09	Association analyses identify 38 susceptibility loci for inflammatory bowel disease and highlight shared genetic risk across populations.	26192919
		rs3766606	1	7962137	PARK7	4.51e-09	Association analyses identify 38 susceptibility loci for inflammatory bowel disease and highlight shared genetic risk across populations.	26192919
		rs670523	1	155908941	RIT1	6.03e-09	Association analyses identify 38 susceptibility loci for inflammatory bowel disease and highlight shared genetic risk across populations.	26192919
		rs7758080	6	149255943	LOC105378049, TAB2	7.27e-09	Association analyses identify 38 susceptibility loci for inflammatory bowel disease and highlight shared genetic risk across populations.	26192919
		rs7236492	18	79460616	NFATC1, LOC101927897	9.09e-09	Association analyses identify 38 susceptibility loci for inflammatory bowel disease and highlight shared genetic risk across populations.	26192919
		rs568617	11	65885771	FIBP	1.75e-08	Association analyses identify 38 susceptibility loci for inflammatory bowel disease and highlight shared genetic risk across populations.	26192919
		rs17119	6	14719265	LOC101928354 - LOC107986572	1.94e-08	Association analyses identify 38 susceptibility loci for inflammatory bowel disease and highlight shared genetic risk across populations.	26192919
		rs915286	13	40121855	LOC107984569 - LINC00332	2.59e-08	Association analyses identify 38 susceptibility loci for inflammatory bowel disease and highlight shared genetic risk across populations.	26192919
		rs3851228	6	111526988	LOC107986522, TRAF3IP2-AS1	2.76e-08	Association analyses identify 38 susceptibility loci for inflammatory bowel disease and highlight shared genetic risk across populations.	26192919
		rs13204048	6	3420172	SLC22A23	2.89e-08	Association analyses identify 38 susceptibility loci for inflammatory bowel disease and highlight shared genetic risk across populations.	26192919
		rs314313	7	100825743	EPHB4	2.9e-08	Association analyses identify 38 susceptibility loci for inflammatory bowel disease and highlight shared genetic risk across populations.	26192919
		rs4703855	5	72398072	RPL10AP8 - YBX1P5	3.03e-08	Association analyses identify 38 susceptibility loci for inflammatory bowel disease and highlight shared genetic risk across populations.	26192919
		rs4976646	5	177361569	RGS14	3.47e-08	Association analyses identify 38 susceptibility loci for inflammatory bowel disease and highlight shared genetic risk across populations.	26192919
		rs9297145	7	99161494	KPNA7	4.05e-08	Association analyses identify 38 susceptibility loci for inflammatory bowel disease and highlight shared genetic risk across populations.	26192919
		rs10789230	1	67264945	IL23R - RNU4ATAC4P	1e-08	Genome-wide association study for Crohn's disease in the Quebec Founder Population identifies multiple validated disease loci.	17804789
		rs1343151	1	67253446	IL23R	1e-08	Genome-wide association study for Crohn's disease in the Quebec Founder Population identifies multiple validated disease loci.	17804789
		rs6669582	1	67264372	IL23R - RNU4ATAC4P	1e-08	Genome-wide association study for Crohn's disease in the Quebec Founder Population identifies multiple validated disease loci.	17804789
		rs10889676	1	67256884	IL23R	1e-08	Genome-wide association study for Crohn's disease in the Quebec Founder Population identifies multiple validated disease loci.	17804789
		rs11209003	1	67135449	C1orf141	1e-08	Genome-wide association study for Crohn's disease in the Quebec Founder Population identifies multiple validated disease loci.	17804789
		rs12567232	1	67262335	IL23R - RNU4ATAC4P	1e-08	Genome-wide association study for Crohn's disease in the Quebec Founder Population identifies multiple validated disease loci.	17804789
		rs11209002	1	67124778	C1orf141	1e-08	Genome-wide association study for Crohn's disease in the Quebec Founder Population identifies multiple validated disease loci.	17804789
		rs10889677	1	67259437	IL23R	1e-08	Genome-wide association study for Crohn's disease in the Quebec Founder Population identifies multiple validated disease loci.	17804789
		rs2201841	1	67228519	IL23R	1e-08	Genome-wide association study for Crohn's disease in the Quebec Founder Population identifies multiple validated disease loci.	17804789
		rs1004819	1	67204530	IL23R	1e-08	Genome-wide association study for Crohn's disease in the Quebec Founder Population identifies multiple validated disease loci.	17804789
		rs9988642	1	67260421	IL23R	1e-08	Genome-wide association study for Crohn's disease in the Quebec Founder Population identifies multiple validated disease loci.	17804789
		rs2902440	1	67205233	IL23R - RNU4ATAC4P	1e-08	Genome-wide association study for Crohn's disease in the Quebec Founder Population identifies multiple validated disease loci.	17804789
		rs2064689	1	67187327	IL23R	1e-08	Genome-wide association study for Crohn's disease in the Quebec Founder Population identifies multiple validated disease loci.	17804789
		rs11465802	1	67219915	IL23R;	1e-08	Genome-wide association study for Crohn's disease in the Quebec Founder Population identifies multiple validated disease loci.	17804789
		rs10210302	2	233250193	INPP5D - ATG16L1	5.26e-14	Genome-wide association study of 14,000 cases of seven common diseases and 3,000 shared controls.	17554300
		rs17234657	5	40401407	LOC105374736 - LOC105374737	1.99e-12	Genome-wide association study of 14,000 cases of seven common diseases and 3,000 shared controls.	17554300
		rs11805303	1	67209833	IL23R	5.85e-12	Genome-wide association study of 14,000 cases of seven common diseases and 3,000 shared controls.	17554300
		rs17221417	16	50705671	NOD2	3.98e-11	Genome-wide association study of 14,000 cases of seven common diseases and 3,000 shared controls.	17554300
		rs2076756	16	50722970	NOD2	3.98e-69	Genome-wide meta-analysis increases to 71 the number of confirmed Crohn's disease susceptibility loci.	21102463
		rs11209026	1	67240275	IL23R	1e-64	Genome-wide meta-analysis increases to 71 the number of confirmed Crohn's disease susceptibility loci.	21102463
		rs3792109	2	233275771	ATG16L1, SCARNA5	6.76e-41	Genome-wide meta-analysis increases to 71 the number of confirmed Crohn's disease susceptibility loci.	21102463
		rs4077515	9	136372044	CARD9	1.3e-36	Genome-wide meta-analysis increases to 71 the number of confirmed Crohn's disease susceptibility loci.	21102463
		rs1250550	10	79300560	ZMIZ1	1.1e-30	Genome-wide meta-analysis increases to 71 the number of confirmed Crohn's disease susceptibility loci.	21102463
		rs11564258	12	40398498	MUC19, LOC105369736	6.17e-21	Genome-wide meta-analysis increases to 71 the number of confirmed Crohn's disease susceptibility loci.	21102463
		rs12521868	5	132448701	C5orf56	1.41e-20	Genome-wide meta-analysis increases to 71 the number of confirmed Crohn's disease susceptibility loci.	21102463
		rs7714584	5	150890858	IRGM	7.76e-19	Genome-wide meta-analysis increases to 71 the number of confirmed Crohn's disease susceptibility loci.	21102463
		rs1819658	10	58153390	MRPS35P3 - IPMK	9.1e-17	Genome-wide meta-analysis increases to 71 the number of confirmed Crohn's disease susceptibility loci.	21102463
		rs181359	22	21574352	UBE2L3	4.8e-16	Genome-wide meta-analysis increases to 71 the number of confirmed Crohn's disease susceptibility loci.	21102463
		rs3810936	9	114790605	TNFSF15	1e-15	Genome-wide meta-analysis increases to 71 the number of confirmed Crohn's disease susceptibility loci.	21102463
		rs4809330	20	63718234	ZGPAT	2.7e-15	Genome-wide meta-analysis increases to 71 the number of confirmed Crohn's disease susceptibility loci.	21102463
		rs2838519	21	44195140	LOC105377139 - LOC107983952	2.09e-14	Genome-wide meta-analysis increases to 71 the number of confirmed Crohn's disease susceptibility loci.	21102463
		rs10758669	9	4981602	HNRNPA1P41 - JAK2	1e-13	Genome-wide meta-analysis increases to 71 the number of confirmed Crohn's disease susceptibility loci.	21102463
		rs3180018	1	155260340	SCAMP3	2.3e-13	Genome-wide meta-analysis increases to 71 the number of confirmed Crohn's disease susceptibility loci.	21102463
		rs7423615	2	230252159	SP140	3.1e-13	Genome-wide meta-analysis increases to 71 the number of confirmed Crohn's disease susceptibility loci.	21102463
		rs7927997	11	76590331	C11orf30 - LOC101928813	5.62e-13	Genome-wide meta-analysis increases to 71 the number of confirmed Crohn's disease susceptibility loci.	21102463
		rs4871611	8	125525328	LOC105375746	1.51e-12	Genome-wide meta-analysis increases to 71 the number of confirmed Crohn's disease susceptibility loci.	21102463
		rs2058660	2	102437989	IL18RAP	1.58e-12	Genome-wide meta-analysis increases to 71 the number of confirmed Crohn's disease susceptibility loci.	21102463
		rs359457	5	173852839	LOC107986482 - CPEB4	2.5e-12	Genome-wide meta-analysis increases to 71 the number of confirmed Crohn's disease susceptibility loci.	21102463
		rs415890	6	166993145	LOC105378120 - MIR3939	2.51e-12	Genome-wide meta-analysis increases to 71 the number of confirmed Crohn's disease susceptibility loci.	21102463
		rs7702331	5	73255307	LOC105379031	5.9e-12	Genome-wide meta-analysis increases to 71 the number of confirmed Crohn's disease susceptibility loci.	21102463
		rs713875	22	30196498	HORMAD2, LOC105372988	7.3e-12	Genome-wide meta-analysis increases to 71 the number of confirmed Crohn's disease susceptibility loci.	21102463
		rs281379	19	48711017	MAMSTR	7.4e-12	Genome-wide meta-analysis increases to 71 the number of confirmed Crohn's disease susceptibility loci.	21102463
		rs740495	19	1124836	SBNO2	8.13e-12	Genome-wide meta-analysis increases to 71 the number of confirmed Crohn's disease susceptibility loci.	21102463
		rs1736020	21	15440233	LOC101927745	9.33e-12	Genome-wide meta-analysis increases to 71 the number of confirmed Crohn's disease susceptibility loci.	21102463
		rs151181	16	28479196	CLN3	1.5e-11	Genome-wide meta-analysis increases to 71 the number of confirmed Crohn's disease susceptibility loci.	21102463
		rs102275	11	61790331	TMEM258	2.3e-11	Genome-wide meta-analysis increases to 71 the number of confirmed Crohn's disease susceptibility loci.	21102463
		rs1799964	6	31574531	LTA - TNF	3.98e-11	Genome-wide meta-analysis increases to 71 the number of confirmed Crohn's disease susceptibility loci.	21102463
		rs780093	2	27519736	GCKR	4.7e-11	Genome-wide meta-analysis increases to 71 the number of confirmed Crohn's disease susceptibility loci.	21102463
		rs2549794	5	96908845	ERAP1, ERAP2	1.1e-10	Genome-wide meta-analysis increases to 71 the number of confirmed Crohn's disease susceptibility loci.	21102463
		rs4902642	14	68743482	LOC107984647	1.6e-10	Genome-wide meta-analysis increases to 71 the number of confirmed Crohn's disease susceptibility loci.	21102463
		rs2062305	13	42478744	LOC105370177	4.9e-10	Genome-wide meta-analysis increases to 71 the number of confirmed Crohn's disease susceptibility loci.	21102463
		rs694739	11	64329761	LOC102723878	6e-10	Genome-wide meta-analysis increases to 71 the number of confirmed Crohn's disease susceptibility loci.	21102463
		rs13428812	2	25269598	DNMT3A	8.5e-10	Genome-wide meta-analysis increases to 71 the number of confirmed Crohn's disease susceptibility loci.	21102463
		rs12242110	10	35246767	LOC105376493 - CCNY	1.1e-09	Genome-wide meta-analysis increases to 71 the number of confirmed Crohn's disease susceptibility loci.	21102463
		rs2872507	17	39884510	ZPBP2 - GSDMB	1.51e-09	Genome-wide meta-analysis increases to 71 the number of confirmed Crohn's disease susceptibility loci.	21102463
		rs11167764	5	142099500	LOC105378204	2e-09	Genome-wide meta-analysis increases to 71 the number of confirmed Crohn's disease susceptibility loci.	21102463
		rs12722489	10	6060049	IL2RA	2.9e-09	Genome-wide meta-analysis increases to 71 the number of confirmed Crohn's disease susceptibility loci.	21102463
		rs6738825	2	198032171	PLCL1	3.5e-09	Genome-wide meta-analysis increases to 71 the number of confirmed Crohn's disease susceptibility loci.	21102463
		rs2476601	1	113834946	AP4B1-AS1, PTPN22	4.47e-09	Genome-wide meta-analysis increases to 71 the number of confirmed Crohn's disease susceptibility loci.	21102463
		rs10181042	2	60997124	PUS10	6.61e-09	Genome-wide meta-analysis increases to 71 the number of confirmed Crohn's disease susceptibility loci.	21102463
		rs13073817	3	18665366	RAD23BP1 - LOC105376976	6.7e-09	Genome-wide meta-analysis increases to 71 the number of confirmed Crohn's disease susceptibility loci.	21102463
		rs17309827	6	3433084	SLC22A23	6.7e-09	Genome-wide meta-analysis increases to 71 the number of confirmed Crohn's disease susceptibility loci.	21102463
		rs2797685	1	7819003	PER3	7.1e-09	Genome-wide meta-analysis increases to 71 the number of confirmed Crohn's disease susceptibility loci.	21102463
		rs1998598	1	197758512	DENND1B	8.7e-09	Genome-wide meta-analysis increases to 71 the number of confirmed Crohn's disease susceptibility loci.	21102463
		rs736289	19	33266156	SLC7A10 - CEBPA	8.7e-09	Genome-wide meta-analysis increases to 71 the number of confirmed Crohn's disease susceptibility loci.	21102463
		rs11871801	17	42418754	PTRF	2.51e-08	Genome-wide meta-analysis increases to 71 the number of confirmed Crohn's disease susceptibility loci.	21102463
		rs6568421	6	105987150	RN7SKP211 - PRDM1	4.37e-08	Genome-wide meta-analysis increases to 71 the number of confirmed Crohn's disease susceptibility loci.	21102463
		rs9264942	6	31306603	LOC105375015	4.96e-28	Host-microbe interactions have shaped the genetic architecture of inflammatory bowel disease.	23128233
		rs9286879	1	172893094	AIMP1P2 - TNFSF18	5.53e-22	Host-microbe interactions have shaped the genetic architecture of inflammatory bowel disease.	23128233
		rs1728918	2	27412596	PPM1G - NRBP1	4.86e-16	Host-microbe interactions have shaped the genetic architecture of inflammatory bowel disease.	23128233
		rs12663356	6	21430497	CDKAL1 - LINC00581	4.01e-12	Host-microbe interactions have shaped the genetic architecture of inflammatory bowel disease.	23128233
		rs3897478	1	119908567	ADAM30 - NOTCH2	1.97e-11	Host-microbe interactions have shaped the genetic architecture of inflammatory bowel disease.	23128233
		rs9491697	6	127134977	LOC105377989, RSPO3	3.79e-10	Host-microbe interactions have shaped the genetic architecture of inflammatory bowel disease.	23128233
		rs17695092	5	173910850	CPEB4	4.68e-09	Host-microbe interactions have shaped the genetic architecture of inflammatory bowel disease.	23128233
		rs6837335	4	48361966	SLAIN2	1.75e-08	Host-microbe interactions have shaped the genetic architecture of inflammatory bowel disease.	23128233
		rs9292777	5	40437846	LOC105374736 - LOC105374737	3e-18	Sequence variants in the autophagy gene IRGM and multiple other replicating loci contribute to Crohn's disease susceptibility.	17554261
		rs13361189	5	150843825	SMIM3 - IRGM	2e-10	Sequence variants in the autophagy gene IRGM and multiple other replicating loci contribute to Crohn's disease susceptibility.	17554261
		rs10883365	10	99528007	LINC01475	4e-10	Sequence variants in the autophagy gene IRGM and multiple other replicating loci contribute to Crohn's disease susceptibility.	17554261
		rs10801047	1	191590226	LOC105371660 - LOC107985457	3e-08	Sequence variants in the autophagy gene IRGM and multiple other replicating loci contribute to Crohn's disease susceptibility.	17554261
		rs9858542	3	49664550	BSN	4.91e-08	Sequence variants in the autophagy gene IRGM and multiple other replicating loci contribute to Crohn's disease susceptibility.	17554261
		rs2241880	2	233274722	ATG16L1	1.44e-12	A genome-wide scan of Ashkenazi Jewish Crohn's disease suggests novel susceptibility loci.	22412388
		rs9258260	6	29755384	IFITM4P - 3.8-1.5	1.74e-10	A genome-wide scan of Ashkenazi Jewish Crohn's disease suggests novel susceptibility loci.	22412388
		rs13003464	2	60959694	PUS10	4.73e-09	A genome-wide scan of Ashkenazi Jewish Crohn's disease suggests novel susceptibility loci.	22412388
		rs6545946	2	62486398	LOC105374764, TMEM17	7.01e-09	A genome-wide scan of Ashkenazi Jewish Crohn's disease suggests novel susceptibility loci.	22412388
		rs7076156	10	62655424	LOC105378327, ZNF365	7.29e-09	A genome-wide scan of Ashkenazi Jewish Crohn's disease suggests novel susceptibility loci.	22412388
		rs11229030	11	57435536	SLC43A3 - RNA5SP341	8.45e-09	A genome-wide scan of Ashkenazi Jewish Crohn's disease suggests novel susceptibility loci.	22412388
		rs7705924	5	102611094	LINC00491, LINC00492	1.78e-08	A genome-wide scan of Ashkenazi Jewish Crohn's disease suggests novel susceptibility loci.	22412388
		rs12677663	8	73095112	SBSPON - LOC107986891	1.96e-08	A genome-wide scan of Ashkenazi Jewish Crohn's disease suggests novel susceptibility loci.	22412388
		rs10734105	10	131373856	LOC101927461 - LINC01164	3.34e-08	A genome-wide scan of Ashkenazi Jewish Crohn's disease suggests novel susceptibility loci.	22412388
		rs3091316	17	34266955	CCL2 - CCL7	3.89e-08	A genome-wide scan of Ashkenazi Jewish Crohn's disease suggests novel susceptibility loci.	22412388
		rs3091338	5	132067045	IL3 - CSF2	4.47e-08	A genome-wide scan of Ashkenazi Jewish Crohn's disease suggests novel susceptibility loci.	22412388
		rs56116661	3	188683372	LPP	5.67e-10	Genome-wide association study implicates immune activation of multiple integrin genes in inflammatory bowel disease.	28067908
		rs10492862	16	82833851	CDH13	1.26e-09	Genome-wide association study implicates immune activation of multiple integrin genes in inflammatory bowel disease.	28067908
		rs2581828	3	53099133	RFT1	6.46e-09	Genome-wide association study implicates immune activation of multiple integrin genes in inflammatory bowel disease.	28067908
		rs34687326	1	159830120	SLAMF8	1.06e-08	Genome-wide association study implicates immune activation of multiple integrin genes in inflammatory bowel disease.	28067908
		rs4821544	22	36862461	LOC107985578, NCF4	1.76e-08	Genome-wide association study implicates immune activation of multiple integrin genes in inflammatory bowel disease.	28067908
		rs80244186	13	42343725	AKAP11 - FABP3P2	3.66e-08	Genome-wide association study implicates immune activation of multiple integrin genes in inflammatory bowel disease.	28067908
	Inflammatory bowel disease	rs2858829	6	116447754	DSE - CBX3P9	8.97e-09	A genome-wide association study identifies a novel locus at 6q22.1 associated with ulcerative colitis.	25082827
		rs4820425	22	41035338	RBX1 - RPS9P2	3.42e-08	A genome-wide association study on a southern European population identifies a new Crohn's disease susceptibility locus at RBX1-EP300.	22936669
		rs80174646	1	67242472	IL23R	2.21e-166	Association analyses identify 38 susceptibility loci for inflammatory bowel disease and highlight shared genetic risk across populations.	26192919
		rs7517847	1	67215986	IL23R	9.48e-134	Association analyses identify 38 susceptibility loci for inflammatory bowel disease and highlight shared genetic risk across populations.	26192919
		rs11742570	5	40410482	LOC105374736 - LOC105374737	8.13e-65	Association analyses identify 38 susceptibility loci for inflammatory bowel disease and highlight shared genetic risk across populations.	26192919
		rs4409764	10	99524480	LOC101927300 - LINC01475	1.16e-61	Association analyses identify 38 susceptibility loci for inflammatory bowel disease and highlight shared genetic risk across populations.	26192919
		rs113653754	6	32658495	HLA-DQA1 - HLA-DQB1	3.3e-58	Association analyses identify 38 susceptibility loci for inflammatory bowel disease and highlight shared genetic risk across populations.	26192919
		rs10781499	9	136371953	CARD9	1.71e-53	Association analyses identify 38 susceptibility loci for inflammatory bowel disease and highlight shared genetic risk across populations.	26192919
		rs10761659	10	62685804	ZNF365 - ALDH7A1P4	4.97e-53	Association analyses identify 38 susceptibility loci for inflammatory bowel disease and highlight shared genetic risk across populations.	26192919
		rs3197999	3	49684099	MST1	1.55e-52	Association analyses identify 38 susceptibility loci for inflammatory bowel disease and highlight shared genetic risk across populations.	26192919
		rs3024505	1	206766559	LOC105372877 - IL10	2.99e-50	Association analyses identify 38 susceptibility loci for inflammatory bowel disease and highlight shared genetic risk across populations.	26192919
		rs56167332	5	159400761	LOC285626 - LOC285627	7.17e-50	Association analyses identify 38 susceptibility loci for inflammatory bowel disease and highlight shared genetic risk across populations.	26192919
		rs75900472	9	4981601	HNRNPA1P41 - JAK2	4.7e-48	Association analyses identify 38 susceptibility loci for inflammatory bowel disease and highlight shared genetic risk across populations.	26192919
		rs2836878	21	39093608	LOC107985484 - RPL23AP12	8.25e-48	Association analyses identify 38 susceptibility loci for inflammatory bowel disease and highlight shared genetic risk across populations.	26192919
		rs2155219	11	76588150	C11orf30 - LOC101928813	8.71e-48	Association analyses identify 38 susceptibility loci for inflammatory bowel disease and highlight shared genetic risk across populations.	26192919
		rs7554511	1	200908434	C1orf106	3.2e-44	Association analyses identify 38 susceptibility loci for inflammatory bowel disease and highlight shared genetic risk across populations.	26192919
		rs17622378	5	132442760	C5orf56	1.08e-42	Association analyses identify 38 susceptibility loci for inflammatory bowel disease and highlight shared genetic risk across populations.	26192919
		rs12994997	2	233264857	ATG16L1	2.58e-41	Association analyses identify 38 susceptibility loci for inflammatory bowel disease and highlight shared genetic risk across populations.	26192919
		rs12946510	17	39756124	GRB7 - IKZF3	2.16e-39	Association analyses identify 38 susceptibility loci for inflammatory bowel disease and highlight shared genetic risk across populations.	26192919
		rs2413583	22	39263768	PDGFB - LOC107985575	5.06e-38	Association analyses identify 38 susceptibility loci for inflammatory bowel disease and highlight shared genetic risk across populations.	26192919
		rs7608910	2	60977721	PUS10	2.6e-36	Association analyses identify 38 susceptibility loci for inflammatory bowel disease and highlight shared genetic risk across populations.	26192919
		rs6426833	1	19845367	RNF186 - LOC105376823	3.06e-36	Association analyses identify 38 susceptibility loci for inflammatory bowel disease and highlight shared genetic risk across populations.	26192919
		rs1801274	1	161509955	FCGR2A	8.5e-36	Association analyses identify 38 susceptibility loci for inflammatory bowel disease and highlight shared genetic risk across populations.	26192919
		rs6556412	5	159360377	LOC285626	1.24e-32	Association analyses identify 38 susceptibility loci for inflammatory bowel disease and highlight shared genetic risk across populations.	26192919
		rs1505992	5	40498475	LOC105374736 - LOC105374737	6.61e-32	Association analyses identify 38 susceptibility loci for inflammatory bowel disease and highlight shared genetic risk across populations.	26192919
		rs11741861	5	150898347	ZNF300, IRGM	5.5e-31	Association analyses identify 38 susceptibility loci for inflammatory bowel disease and highlight shared genetic risk across populations.	26192919
		rs7282490	21	44195858	LOC105377139 - LOC107983952	9.85e-30	Association analyses identify 38 susceptibility loci for inflammatory bowel disease and highlight shared genetic risk across populations.	26192919
		rs4246905	9	114790969	TNFSF15	2.86e-29	Association analyses identify 38 susceptibility loci for inflammatory bowel disease and highlight shared genetic risk across populations.	26192919
		rs1893217	18	12809341	PTPN2	1.37e-27	Association analyses identify 38 susceptibility loci for inflammatory bowel disease and highlight shared genetic risk across populations.	26192919
		rs2823286	21	15445619	LOC101927745 - CYCSP42	1.62e-27	Association analyses identify 38 susceptibility loci for inflammatory bowel disease and highlight shared genetic risk across populations.	26192919
		rs7134472	12	68106206	LOC107984526	5.64e-27	Association analyses identify 38 susceptibility loci for inflammatory bowel disease and highlight shared genetic risk across populations.	26192919
		rs9313808	5	159393836	LOC285626 - LOC285627	1.15e-25	Association analyses identify 38 susceptibility loci for inflammatory bowel disease and highlight shared genetic risk across populations.	26192919
		rs11010067	10	35006503	LOC105376491 - CUL2	6.37e-25	Association analyses identify 38 susceptibility loci for inflammatory bowel disease and highlight shared genetic risk across populations.	26192919
		rs11743851	5	131277907	CDC42SE2	1.57e-23	Association analyses identify 38 susceptibility loci for inflammatory bowel disease and highlight shared genetic risk across populations.	26192919
		rs12942547	17	42375526	STAT3	1.03e-21	Association analyses identify 38 susceptibility loci for inflammatory bowel disease and highlight shared genetic risk across populations.	26192919
		rs3806308	1	19816373	RNF186 - LOC105376823	1.08e-21	Association analyses identify 38 susceptibility loci for inflammatory bowel disease and highlight shared genetic risk across populations.	26192919
		rs26528	16	28506388	IL27	1.23e-21	Association analyses identify 38 susceptibility loci for inflammatory bowel disease and highlight shared genetic risk across populations.	26192919
		rs224090	10	62781559	ALDH7A1P4 - ADO	1.32e-21	Association analyses identify 38 susceptibility loci for inflammatory bowel disease and highlight shared genetic risk across populations.	26192919
		rs12422544	12	40134630	SLC2A13 - LOC101930164	2.13e-21	Association analyses identify 38 susceptibility loci for inflammatory bowel disease and highlight shared genetic risk across populations.	26192919
		rs11554257	9	114842790	TNFSF15 - LOC645266	3.93e-21	Association analyses identify 38 susceptibility loci for inflammatory bowel disease and highlight shared genetic risk across populations.	26192919
		rs7746082	6	105987394	RN7SKP211 - PRDM1	1.29e-20	Association analyses identify 38 susceptibility loci for inflammatory bowel disease and highlight shared genetic risk across populations.	26192919
		rs13407913	2	24874775	ADCY3	1.69e-20	Association analyses identify 38 susceptibility loci for inflammatory bowel disease and highlight shared genetic risk across populations.	26192919
		rs6062504	20	63717555	ZGPAT	2.12e-20	Association analyses identify 38 susceptibility loci for inflammatory bowel disease and highlight shared genetic risk across populations.	26192919
		rs395157	5	38867630	OSMR	2.22e-20	Association analyses identify 38 susceptibility loci for inflammatory bowel disease and highlight shared genetic risk across populations.	26192919
		rs17293632	15	67150258	SMAD3	2.71e-20	Association analyses identify 38 susceptibility loci for inflammatory bowel disease and highlight shared genetic risk across populations.	26192919
		rs3091315	17	34266646	CCL2 - CCL7	4.35e-20	Association analyses identify 38 susceptibility loci for inflammatory bowel disease and highlight shared genetic risk across populations.	26192919
		rs11879191	19	10402235	CDC37	5.27e-20	Association analyses identify 38 susceptibility loci for inflammatory bowel disease and highlight shared genetic risk across populations.	26192919
		rs13300218	9	136505189	NOTCH1	6.58e-20	Association analyses identify 38 susceptibility loci for inflammatory bowel disease and highlight shared genetic risk across populations.	26192919
		rs2024092	19	1124032	SBNO2	1.12e-18	Association analyses identify 38 susceptibility loci for inflammatory bowel disease and highlight shared genetic risk across populations.	26192919
		rs116392568	6	31306603	LOC105375015	1.55e-18	Association analyses identify 38 susceptibility loci for inflammatory bowel disease and highlight shared genetic risk across populations.	26192919
		rs12627970	22	39325740	RPL3 - SYNGR1	1.94e-18	Association analyses identify 38 susceptibility loci for inflammatory bowel disease and highlight shared genetic risk across populations.	26192919
		rs9868809	3	48643620	CELSR3	8.17e-18	Association analyses identify 38 susceptibility loci for inflammatory bowel disease and highlight shared genetic risk across populations.	26192919
		rs3766606	1	7962137	PARK7	8.84e-18	Association analyses identify 38 susceptibility loci for inflammatory bowel disease and highlight shared genetic risk across populations.	26192919
		rs4845604	1	151829204	RORC	1.21e-17	Association analyses identify 38 susceptibility loci for inflammatory bowel disease and highlight shared genetic risk across populations.	26192919
		rs8005161	14	88006251	GPR65	1.37e-16	Association analyses identify 38 susceptibility loci for inflammatory bowel disease and highlight shared genetic risk across populations.	26192919
		rs6588248	1	67187301	IL23R	1.38487e-16	Association analyses identify 38 susceptibility loci for inflammatory bowel disease and highlight shared genetic risk across populations.	26192919
		rs3749171	2	240630275	GPR35	1.57e-16	Association analyses identify 38 susceptibility loci for inflammatory bowel disease and highlight shared genetic risk across populations.	26192919
		rs10185424	2	102046427	LOC107985926 - IL1R1	1.63e-16	Association analyses identify 38 susceptibility loci for inflammatory bowel disease and highlight shared genetic risk across populations.	26192919
		rs921720	8	125522429	TRIB1 - LOC105375746	3.23e-16	Association analyses identify 38 susceptibility loci for inflammatory bowel disease and highlight shared genetic risk across populations.	26192919
		rs12720356	19	10359299	TYK2	4.13e-16	Association analyses identify 38 susceptibility loci for inflammatory bowel disease and highlight shared genetic risk across populations.	26192919
		rs13300483	9	114881082	LOC645266 - TNFSF8	6.33e-16	Association analyses identify 38 susceptibility loci for inflammatory bowel disease and highlight shared genetic risk across populations.	26192919
		rs3764147	13	43883789	LACC1	8.7e-16	Association analyses identify 38 susceptibility loci for inflammatory bowel disease and highlight shared genetic risk across populations.	26192919
		rs2488389	1	197662011	DENND1B	1.26e-15	Association analyses identify 38 susceptibility loci for inflammatory bowel disease and highlight shared genetic risk across populations.	26192919
		rs7097656	10	80491075	TSPAN14	1.27e-15	Association analyses identify 38 susceptibility loci for inflammatory bowel disease and highlight shared genetic risk across populations.	26192919
		rs3851228	6	111526988	LOC107986522, TRAF3IP2-AS1	1.5e-15	Association analyses identify 38 susceptibility loci for inflammatory bowel disease and highlight shared genetic risk across populations.	26192919
		rs4380874	7	107839870	PIGCP2 - LOC105375444	1.53e-15	Association analyses identify 38 susceptibility loci for inflammatory bowel disease and highlight shared genetic risk across populations.	26192919
		rs4768236	12	40362670	LOC105369736, LRRK2	1.76e-15	Association analyses identify 38 susceptibility loci for inflammatory bowel disease and highlight shared genetic risk across populations.	26192919
		rs1819333	6	166960059	RNASET2 - LOC105378120	2.72e-15	Association analyses identify 38 susceptibility loci for inflammatory bowel disease and highlight shared genetic risk across populations.	26192919
		rs1842076	5	40236916	KRT18P56 - RNU1-150P	4.15e-15	Association analyses identify 38 susceptibility loci for inflammatory bowel disease and highlight shared genetic risk across populations.	26192919
		rs1363907	5	96917099	ERAP1, ERAP2	4.87e-15	Association analyses identify 38 susceptibility loci for inflammatory bowel disease and highlight shared genetic risk across populations.	26192919
		rs5763767	22	30097893	HORMAD2	8.82e-15	Association analyses identify 38 susceptibility loci for inflammatory bowel disease and highlight shared genetic risk across populations.	26192919
		rs1260326	2	27508073	GCKR	1.03e-14	Association analyses identify 38 susceptibility loci for inflammatory bowel disease and highlight shared genetic risk across populations.	26192919
		rs11641184	16	11610795	LITAF	1.09e-14	Association analyses identify 38 susceptibility loci for inflammatory bowel disease and highlight shared genetic risk across populations.	26192919
		rs17694108	19	33240645	SLC7A10 - CEBPA	1.21e-14	Association analyses identify 38 susceptibility loci for inflammatory bowel disease and highlight shared genetic risk across populations.	26192919
		rs1250546	10	79272775	ZMIZ1	1.29e-14	Association analyses identify 38 susceptibility loci for inflammatory bowel disease and highlight shared genetic risk across populations.	26192919
		rs6920220	6	137685367	LOC102723649 - LOC442263	1.43e-14	Association analyses identify 38 susceptibility loci for inflammatory bowel disease and highlight shared genetic risk across populations.	26192919
		rs11230563	11	61008737	CD6	1.71e-14	Association analyses identify 38 susceptibility loci for inflammatory bowel disease and highlight shared genetic risk across populations.	26192919
		rs6863411	5	142133639	NDFIP1	2.41e-14	Association analyses identify 38 susceptibility loci for inflammatory bowel disease and highlight shared genetic risk across populations.	26192919
		rs925255	2	28391927	FLJ31356	2.7e-14	Association analyses identify 38 susceptibility loci for inflammatory bowel disease and highlight shared genetic risk across populations.	26192919
		rs12718244	7	50136058	C7orf72	3.35e-14	Association analyses identify 38 susceptibility loci for inflammatory bowel disease and highlight shared genetic risk across populations.	26192919
		rs1517352	2	191066738	STAT4	3.87e-14	Association analyses identify 38 susceptibility loci for inflammatory bowel disease and highlight shared genetic risk across populations.	26192919
		rs6708413	2	102446909	IL18RAP	8.39e-14	Association analyses identify 38 susceptibility loci for inflammatory bowel disease and highlight shared genetic risk across populations.	26192919
		rs2361755	16	85976080	LOC105371388 - LOC105371389	9.21e-14	Association analyses identify 38 susceptibility loci for inflammatory bowel disease and highlight shared genetic risk across populations.	26192919
		rs2930047	5	10695414	DAP	9.78e-14	Association analyses identify 38 susceptibility loci for inflammatory bowel disease and highlight shared genetic risk across populations.	26192919
		rs2382817	2	218286495	PNKD, TMBIM1	1.13e-13	Association analyses identify 38 susceptibility loci for inflammatory bowel disease and highlight shared genetic risk across populations.	26192919
		rs516246	19	48702915	FUT2, LOC105447645	1.15e-13	Association analyses identify 38 susceptibility loci for inflammatory bowel disease and highlight shared genetic risk across populations.	26192919
		rs7657746	4	122240464	KIAA1109	1.8e-13	Association analyses identify 38 susceptibility loci for inflammatory bowel disease and highlight shared genetic risk across populations.	26192919
		rs559928	11	64382898	RPS6KA4 - LOC107984366	3.33e-13	Association analyses identify 38 susceptibility loci for inflammatory bowel disease and highlight shared genetic risk across populations.	26192919
		rs1456896	7	50264865	C7orf72 - IKZF1	3.48e-13	Association analyses identify 38 susceptibility loci for inflammatory bowel disease and highlight shared genetic risk across populations.	26192919
		rs6908425	6	20728500	CDKAL1	5.41e-13	Association analyses identify 38 susceptibility loci for inflammatory bowel disease and highlight shared genetic risk across populations.	26192919
		rs941823	13	40439840	LINC00598	6.19e-13	Association analyses identify 38 susceptibility loci for inflammatory bowel disease and highlight shared genetic risk across populations.	26192919
		rs3742130	13	99255087	UBAC2, GPR18	9.19e-13	Association analyses identify 38 susceptibility loci for inflammatory bowel disease and highlight shared genetic risk across populations.	26192919
		rs1292053	17	59886176	TUBD1	9.89e-13	Association analyses identify 38 susceptibility loci for inflammatory bowel disease and highlight shared genetic risk across populations.	26192919
		rs10495903	2	43579779	THADA	2.61492e-12	Association analyses identify 38 susceptibility loci for inflammatory bowel disease and highlight shared genetic risk across populations.	26192919
		rs2256609	22	21570728	UBE2L3	2.73e-12	Association analyses identify 38 susceptibility loci for inflammatory bowel disease and highlight shared genetic risk across populations.	26192919
		rs4976646	5	177361569	RGS14	3.23e-12	Association analyses identify 38 susceptibility loci for inflammatory bowel disease and highlight shared genetic risk across populations.	26192919
		rs12722515	10	6039267	IL2RA	4.57e-12	Association analyses identify 38 susceptibility loci for inflammatory bowel disease and highlight shared genetic risk across populations.	26192919
		rs11229555	11	58641214	ZFP91-CNTF - GLYAT	5.23e-12	Association analyses identify 38 susceptibility loci for inflammatory bowel disease and highlight shared genetic risk across populations.	26192919
		rs6740462	2	65440138	SPRED2 - LOC105374780	5.59e-12	Association analyses identify 38 susceptibility loci for inflammatory bowel disease and highlight shared genetic risk across populations.	26192919
		rs259964	20	59249254	ZNF831	6.93e-12	Association analyses identify 38 susceptibility loci for inflammatory bowel disease and highlight shared genetic risk across populations.	26192919
		rs4656958	1	160887174	ITLN1 - LOC646347	2.05e-11	Association analyses identify 38 susceptibility loci for inflammatory bowel disease and highlight shared genetic risk across populations.	26192919
		rs17119	6	14719265	LOC101928354 - LOC107986572	2.18e-11	Association analyses identify 38 susceptibility loci for inflammatory bowel disease and highlight shared genetic risk across populations.	26192919
		rs7805114	7	107809588	PIGCP2, DLD	2.49837e-11	Association analyses identify 38 susceptibility loci for inflammatory bowel disease and highlight shared genetic risk across populations.	26192919
		rs2538470	7	148523356	LOC392145 - RPL32P17	3e-11	Association analyses identify 38 susceptibility loci for inflammatory bowel disease and highlight shared genetic risk across populations.	26192919
		rs17780256	17	72646784	LOC105371887, SLC39A11	3.19e-11	Association analyses identify 38 susceptibility loci for inflammatory bowel disease and highlight shared genetic risk across populations.	26192919
		rs12103	1	1312114	CPSF3L	3.28e-11	Association analyses identify 38 susceptibility loci for inflammatory bowel disease and highlight shared genetic risk across populations.	26192919
		rs913678	20	50338887	LINC01271 - LOC105372657	5.35e-11	Association analyses identify 38 susceptibility loci for inflammatory bowel disease and highlight shared genetic risk across populations.	26192919
		rs4703855	5	72398072	RPL10AP8 - YBX1P5	7.16e-11	Association analyses identify 38 susceptibility loci for inflammatory bowel disease and highlight shared genetic risk across populations.	26192919
		rs17085007	13	26957130	FGFR1OP2P1 - RPS21P8	7.52e-11	Association analyses identify 38 susceptibility loci for inflammatory bowel disease and highlight shared genetic risk across populations.	26192919
		rs6074022	20	46111557	RPL13P2 - CD40	8.32e-11	Association analyses identify 38 susceptibility loci for inflammatory bowel disease and highlight shared genetic risk across populations.	26192919
		rs9297145	7	99161494	KPNA7	9.94e-11	Association analyses identify 38 susceptibility loci for inflammatory bowel disease and highlight shared genetic risk across populations.	26192919
		rs13126505	4	101944147	BANK1	1e-10	Association analyses identify 38 susceptibility loci for inflammatory bowel disease and highlight shared genetic risk across populations.	26192919
		rs7240004	18	48868651	CTIF - SMAD7	1.01e-10	Association analyses identify 38 susceptibility loci for inflammatory bowel disease and highlight shared genetic risk across populations.	26192919
		rs6716753	2	230232414	SP140	1.23e-10	Association analyses identify 38 susceptibility loci for inflammatory bowel disease and highlight shared genetic risk across populations.	26192919
		rs1042058	10	30439172	MAP3K8	1.29e-10	Association analyses identify 38 susceptibility loci for inflammatory bowel disease and highlight shared genetic risk across populations.	26192919
		rs423674	16	11279548	LOC105371082	1.54e-10	Association analyses identify 38 susceptibility loci for inflammatory bowel disease and highlight shared genetic risk across populations.	26192919
		rs4256159	3	18725912	LOC105376976	2.06e-10	Association analyses identify 38 susceptibility loci for inflammatory bowel disease and highlight shared genetic risk across populations.	26192919
		rs111781203	2	227795396	─	2.15805e-10	Association analyses identify 38 susceptibility loci for inflammatory bowel disease and highlight shared genetic risk across populations.	26192919
		rs71559680	6	21430497	CDKAL1 - LINC00581	2.4e-10	Association analyses identify 38 susceptibility loci for inflammatory bowel disease and highlight shared genetic risk across populations.	26192919
		rs1199103	10	58187470	MRPS35P3 - IPMK	3.22e-10	Association analyses identify 38 susceptibility loci for inflammatory bowel disease and highlight shared genetic risk across populations.	26192919
		rs12568930	1	22375738	LOC101060363 - LOC105376856	3.64e-10	Association analyses identify 38 susceptibility loci for inflammatory bowel disease and highlight shared genetic risk across populations.	26192919
		rs2816958	1	200132792	NR5A2	3.64e-10	Association analyses identify 38 susceptibility loci for inflammatory bowel disease and highlight shared genetic risk across populations.	26192919
		rs314313	7	100825743	EPHB4	3.92e-10	Association analyses identify 38 susceptibility loci for inflammatory bowel disease and highlight shared genetic risk across populations.	26192919
		rs13204742	6	127924620	THEMIS - PTPRK	5.39e-10	Association analyses identify 38 susceptibility loci for inflammatory bowel disease and highlight shared genetic risk across populations.	26192919
		rs1847472	6	90263440	BACH2	6.63e-10	Association analyses identify 38 susceptibility loci for inflammatory bowel disease and highlight shared genetic risk across populations.	26192919
		rs3853824	17	56803632	C17orf67	7.7e-10	Association analyses identify 38 susceptibility loci for inflammatory bowel disease and highlight shared genetic risk across populations.	26192919
		rs254560	5	135107916	C5orf66	8.55e-10	Association analyses identify 38 susceptibility loci for inflammatory bowel disease and highlight shared genetic risk across populations.	26192919
		rs6651252	8	128554935	LINC00824	9.08e-10	Association analyses identify 38 susceptibility loci for inflammatory bowel disease and highlight shared genetic risk across populations.	26192919
		rs1182188	7	2830351	GNA12	1.08e-09	Association analyses identify 38 susceptibility loci for inflammatory bowel disease and highlight shared genetic risk across populations.	26192919
		rs2227551	10	73909432	PLAU	1.28e-09	Association analyses identify 38 susceptibility loci for inflammatory bowel disease and highlight shared genetic risk across populations.	26192919
		rs561722	11	114516108	NXPE2	1.62e-09	Association analyses identify 38 susceptibility loci for inflammatory bowel disease and highlight shared genetic risk across populations.	26192919
		rs10995235	10	62609990	ZNF365	1.87475e-09	Association analyses identify 38 susceptibility loci for inflammatory bowel disease and highlight shared genetic risk across populations.	26192919
		rs11681525	2	144734815	TEX41	2.09e-09	Association analyses identify 38 susceptibility loci for inflammatory bowel disease and highlight shared genetic risk across populations.	26192919
		rs7555082	1	198629533	ATP6V1G3 - PTPRC	2.54e-09	Association analyses identify 38 susceptibility loci for inflammatory bowel disease and highlight shared genetic risk across populations.	26192919
		rs915286	13	40121855	LOC107984569 - LINC00332	2.89e-09	Association analyses identify 38 susceptibility loci for inflammatory bowel disease and highlight shared genetic risk across populations.	26192919
		rs1569328	14	75275048	LOC105370571 - FOS	3.21e-09	Association analyses identify 38 susceptibility loci for inflammatory bowel disease and highlight shared genetic risk across populations.	26192919
		rs4743820	9	91166134	LINC00484	3.8e-09	Association analyses identify 38 susceptibility loci for inflammatory bowel disease and highlight shared genetic risk across populations.	26192919
		rs2111485	2	162254026	LOC105373724 - IFIH1	4.6e-09	Association analyses identify 38 susceptibility loci for inflammatory bowel disease and highlight shared genetic risk across populations.	26192919
		rs17061048	13	40258875	RNY3P9 - LINC00598	4.66e-09	Association analyses identify 38 susceptibility loci for inflammatory bowel disease and highlight shared genetic risk across populations.	26192919
		rs2284553	21	33404389	IFNGR2	4.82e-09	Association analyses identify 38 susceptibility loci for inflammatory bowel disease and highlight shared genetic risk across populations.	26192919
		rs7773324	6	382559	DUSP22 - IRF4	5.84e-09	Association analyses identify 38 susceptibility loci for inflammatory bowel disease and highlight shared genetic risk across populations.	26192919
		rs9358372	6	20812357	CDKAL1	6.48e-09	Association analyses identify 38 susceptibility loci for inflammatory bowel disease and highlight shared genetic risk across populations.	26192919
		rs6724516	2	240647393	─	8.46802e-09	Association analyses identify 38 susceptibility loci for inflammatory bowel disease and highlight shared genetic risk across populations.	26192919
		rs10051722	5	130768383	ARL2BPP4 - LOC107986449	8.89e-09	Association analyses identify 38 susceptibility loci for inflammatory bowel disease and highlight shared genetic risk across populations.	26192919
		rs34856868	1	92088726	BTBD8	9.8e-09	Association analyses identify 38 susceptibility loci for inflammatory bowel disease and highlight shared genetic risk across populations.	26192919
		rs174537	11	61785208	MYRF	1.03e-08	Association analyses identify 38 susceptibility loci for inflammatory bowel disease and highlight shared genetic risk across populations.	26192919
		rs653178	12	111569952	ATXN2	1.11e-08	Association analyses identify 38 susceptibility loci for inflammatory bowel disease and highlight shared genetic risk across populations.	26192919
		rs4692386	4	26130739	LOC645481 - LOC105374541	1.21e-08	Association analyses identify 38 susceptibility loci for inflammatory bowel disease and highlight shared genetic risk across populations.	26192919
		rs7236492	18	79460616	NFATC1, LOC101927897	1.45e-08	Association analyses identify 38 susceptibility loci for inflammatory bowel disease and highlight shared genetic risk across populations.	26192919
		rs72810983	5	173891251	CPEB4	1.57e-08	Association analyses identify 38 susceptibility loci for inflammatory bowel disease and highlight shared genetic risk across populations.	26192919
		rs907611	11	1852842	LOC107984299 - LSP1	1.59e-08	Association analyses identify 38 susceptibility loci for inflammatory bowel disease and highlight shared genetic risk across populations.	26192919
		rs4802307	19	46346549	HIF3A - PPP5C	1.72e-08	Association analyses identify 38 susceptibility loci for inflammatory bowel disease and highlight shared genetic risk across populations.	26192919
		rs7011507	8	48216682	LOC100287157 - LOC100130299	2.03e-08	Association analyses identify 38 susceptibility loci for inflammatory bowel disease and highlight shared genetic risk across populations.	26192919
		rs6025	1	169549811	F5	2.51e-08	Association analyses identify 38 susceptibility loci for inflammatory bowel disease and highlight shared genetic risk across populations.	26192919
		rs4664304	2	159937497	PLA2R1	2.61e-08	Association analyses identify 38 susceptibility loci for inflammatory bowel disease and highlight shared genetic risk across populations.	26192919
		rs2945412	17	27516617	KSR1	2.77e-08	Association analyses identify 38 susceptibility loci for inflammatory bowel disease and highlight shared genetic risk across populations.	26192919
		rs7015630	8	89863690	COX6B1P6 - RNU6-925P	2.9e-08	Association analyses identify 38 susceptibility loci for inflammatory bowel disease and highlight shared genetic risk across populations.	26192919
		rs3172494	3	48694054	IP6K2	2.90194e-08	Association analyses identify 38 susceptibility loci for inflammatory bowel disease and highlight shared genetic risk across populations.	26192919
		rs7404095	16	23853269	PRKCB	3.1e-08	Association analyses identify 38 susceptibility loci for inflammatory bowel disease and highlight shared genetic risk across populations.	26192919
		rs113010081	3	46415921	LOC105377068	4.21e-08	Association analyses identify 38 susceptibility loci for inflammatory bowel disease and highlight shared genetic risk across populations.	26192919
		rs727088	18	69863203	CD226	4.40086e-08	Association analyses identify 38 susceptibility loci for inflammatory bowel disease and highlight shared genetic risk across populations.	26192919
		rs6596	16	50675812	SNX20	2.85e-24	Genetic architecture differences between pediatric and adult-onset inflammatory bowel diseases in the Polish population.	28008999
		rs1049526	6	32981027	BRD2	5.16e-11	Genetic architecture differences between pediatric and adult-onset inflammatory bowel diseases in the Polish population.	28008999
		rs13333062	16	50888875	LOC107983964	3.79e-10	Genetic architecture differences between pediatric and adult-onset inflammatory bowel diseases in the Polish population.	28008999
		rs2395128	10	75052692	DUPD1	9.36e-09	Genetic architecture differences between pediatric and adult-onset inflammatory bowel diseases in the Polish population.	28008999
		rs2239802	6	32444069	HLA-DRA	1.15e-08	Genetic architecture differences between pediatric and adult-onset inflammatory bowel diseases in the Polish population.	28008999
		rs1004819	1	67204530	IL23R	1e-08	Genome-wide association study for Crohn's disease in the Quebec Founder Population identifies multiple validated disease loci.	17804789
		rs10889676	1	67256884	IL23R	1e-08	Genome-wide association study for Crohn's disease in the Quebec Founder Population identifies multiple validated disease loci.	17804789
		rs11209002	1	67124778	C1orf141	1e-08	Genome-wide association study for Crohn's disease in the Quebec Founder Population identifies multiple validated disease loci.	17804789
		rs11209003	1	67135449	C1orf141	1e-08	Genome-wide association study for Crohn's disease in the Quebec Founder Population identifies multiple validated disease loci.	17804789
		rs11465802	1	67219915	IL23R;	1e-08	Genome-wide association study for Crohn's disease in the Quebec Founder Population identifies multiple validated disease loci.	17804789
		rs12567232	1	67262335	IL23R - RNU4ATAC4P	1e-08	Genome-wide association study for Crohn's disease in the Quebec Founder Population identifies multiple validated disease loci.	17804789
		rs1343151	1	67253446	IL23R	1e-08	Genome-wide association study for Crohn's disease in the Quebec Founder Population identifies multiple validated disease loci.	17804789
		rs2064689	1	67187327	IL23R	1e-08	Genome-wide association study for Crohn's disease in the Quebec Founder Population identifies multiple validated disease loci.	17804789
		rs2902440	1	67205233	IL23R - RNU4ATAC4P	1e-08	Genome-wide association study for Crohn's disease in the Quebec Founder Population identifies multiple validated disease loci.	17804789
		rs6669582	1	67264372	IL23R - RNU4ATAC4P	1e-08	Genome-wide association study for Crohn's disease in the Quebec Founder Population identifies multiple validated disease loci.	17804789
		rs9988642	1	67260421	IL23R	1e-08	Genome-wide association study for Crohn's disease in the Quebec Founder Population identifies multiple validated disease loci.	17804789
		rs4654925	1	19901230	OTUD3	8.1e-17	Genome-wide association study for ulcerative colitis identifies risk loci at 7q22 and 22q13 (IL17REL).	20228798
		rs9268923	6	32465058	HLA-DRB9 - HLA-DRB5	4.1e-15	Genome-wide association study for ulcerative colitis identifies risk loci at 7q22 and 22q13 (IL17REL).	20228798
		rs7809799	7	99162881	KPNA7	8.81e-11	Genome-wide association study for ulcerative colitis identifies risk loci at 7q22 and 22q13 (IL17REL).	20228798
		rs3024493	1	206770623	IL10	1.3e-08	Genome-wide association study for ulcerative colitis identifies risk loci at 7q22 and 22q13 (IL17REL).	20228798
		rs10210302	2	233250193	INPP5D - ATG16L1	5.26e-14	Genome-wide association study of 14,000 cases of seven common diseases and 3,000 shared controls.	17554300
		rs17234657	5	40401407	LOC105374736 - LOC105374737	1.99e-12	Genome-wide association study of 14,000 cases of seven common diseases and 3,000 shared controls.	17554300
		rs11805303	1	67209833	IL23R	5.85e-12	Genome-wide association study of 14,000 cases of seven common diseases and 3,000 shared controls.	17554300
		rs17221417	16	50705671	NOD2	3.98e-11	Genome-wide association study of 14,000 cases of seven common diseases and 3,000 shared controls.	17554300
		rs1728785	16	68557327	ZFP90	2.8e-08	Genome-wide association study of ulcerative colitis identifies three new susceptibility loci, including the HNF4A region.	19915572
		rs886774	7	107854989	PIGCP2 - LOC105375444	3e-08	Genome-wide association study of ulcerative colitis identifies three new susceptibility loci, including the HNF4A region.	19915572
		rs2076756	16	50722970	NOD2	3.98e-69	Genome-wide meta-analysis increases to 71 the number of confirmed Crohn's disease susceptibility loci.	21102463
		rs3792109	2	233275771	ATG16L1, SCARNA5	6.76e-41	Genome-wide meta-analysis increases to 71 the number of confirmed Crohn's disease susceptibility loci.	21102463
		rs4077515	9	136372044	CARD9	1.3e-36	Genome-wide meta-analysis increases to 71 the number of confirmed Crohn's disease susceptibility loci.	21102463
		rs1250550	10	79300560	ZMIZ1	1.1e-30	Genome-wide meta-analysis increases to 71 the number of confirmed Crohn's disease susceptibility loci.	21102463
		rs12521868	5	132448701	C5orf56	1.41e-20	Genome-wide meta-analysis increases to 71 the number of confirmed Crohn's disease susceptibility loci.	21102463
		rs7714584	5	150890858	IRGM	7.76e-19	Genome-wide meta-analysis increases to 71 the number of confirmed Crohn's disease susceptibility loci.	21102463
		rs1819658	10	58153390	MRPS35P3 - IPMK	9.1e-17	Genome-wide meta-analysis increases to 71 the number of confirmed Crohn's disease susceptibility loci.	21102463
		rs181359	22	21574352	UBE2L3	4.8e-16	Genome-wide meta-analysis increases to 71 the number of confirmed Crohn's disease susceptibility loci.	21102463
		rs3810936	9	114790605	TNFSF15	1e-15	Genome-wide meta-analysis increases to 71 the number of confirmed Crohn's disease susceptibility loci.	21102463
		rs7517810	1	172884320	LOC105371618 - AIMP1P2	1.51e-15	Genome-wide meta-analysis increases to 71 the number of confirmed Crohn's disease susceptibility loci.	21102463
		rs4809330	20	63718234	ZGPAT	2.7e-15	Genome-wide meta-analysis increases to 71 the number of confirmed Crohn's disease susceptibility loci.	21102463
		rs3180018	1	155260340	SCAMP3	2.3e-13	Genome-wide meta-analysis increases to 71 the number of confirmed Crohn's disease susceptibility loci.	21102463
		rs7423615	2	230252159	SP140	3.1e-13	Genome-wide meta-analysis increases to 71 the number of confirmed Crohn's disease susceptibility loci.	21102463
		rs7927997	11	76590331	C11orf30 - LOC101928813	5.62e-13	Genome-wide meta-analysis increases to 71 the number of confirmed Crohn's disease susceptibility loci.	21102463
		rs4871611	8	125525328	LOC105375746	1.51e-12	Genome-wide meta-analysis increases to 71 the number of confirmed Crohn's disease susceptibility loci.	21102463
		rs2058660	2	102437989	IL18RAP	1.58e-12	Genome-wide meta-analysis increases to 71 the number of confirmed Crohn's disease susceptibility loci.	21102463
		rs359457	5	173852839	LOC107986482 - CPEB4	2.5e-12	Genome-wide meta-analysis increases to 71 the number of confirmed Crohn's disease susceptibility loci.	21102463
		rs415890	6	166993145	LOC105378120 - MIR3939	2.51e-12	Genome-wide meta-analysis increases to 71 the number of confirmed Crohn's disease susceptibility loci.	21102463
		rs7702331	5	73255307	LOC105379031	5.9e-12	Genome-wide meta-analysis increases to 71 the number of confirmed Crohn's disease susceptibility loci.	21102463
		rs713875	22	30196498	HORMAD2, LOC105372988	7.3e-12	Genome-wide meta-analysis increases to 71 the number of confirmed Crohn's disease susceptibility loci.	21102463
		rs281379	19	48711017	MAMSTR	7.4e-12	Genome-wide meta-analysis increases to 71 the number of confirmed Crohn's disease susceptibility loci.	21102463
		rs740495	19	1124836	SBNO2	8.13e-12	Genome-wide meta-analysis increases to 71 the number of confirmed Crohn's disease susceptibility loci.	21102463
		rs1736020	21	15440233	LOC101927745	9.33e-12	Genome-wide meta-analysis increases to 71 the number of confirmed Crohn's disease susceptibility loci.	21102463
		rs151181	16	28479196	CLN3	1.5e-11	Genome-wide meta-analysis increases to 71 the number of confirmed Crohn's disease susceptibility loci.	21102463
		rs102275	11	61790331	TMEM258	2.3e-11	Genome-wide meta-analysis increases to 71 the number of confirmed Crohn's disease susceptibility loci.	21102463
		rs1799964	6	31574531	LTA - TNF	3.98e-11	Genome-wide meta-analysis increases to 71 the number of confirmed Crohn's disease susceptibility loci.	21102463
		rs780093	2	27519736	GCKR	4.7e-11	Genome-wide meta-analysis increases to 71 the number of confirmed Crohn's disease susceptibility loci.	21102463
		rs2549794	5	96908845	ERAP1, ERAP2	1.1e-10	Genome-wide meta-analysis increases to 71 the number of confirmed Crohn's disease susceptibility loci.	21102463
		rs4902642	14	68743482	LOC107984647	1.6e-10	Genome-wide meta-analysis increases to 71 the number of confirmed Crohn's disease susceptibility loci.	21102463
		rs2062305	13	42478744	LOC105370177	4.9e-10	Genome-wide meta-analysis increases to 71 the number of confirmed Crohn's disease susceptibility loci.	21102463
		rs694739	11	64329761	LOC102723878	6e-10	Genome-wide meta-analysis increases to 71 the number of confirmed Crohn's disease susceptibility loci.	21102463
		rs13428812	2	25269598	DNMT3A	8.5e-10	Genome-wide meta-analysis increases to 71 the number of confirmed Crohn's disease susceptibility loci.	21102463
		rs12242110	10	35246767	LOC105376493 - CCNY	1.1e-09	Genome-wide meta-analysis increases to 71 the number of confirmed Crohn's disease susceptibility loci.	21102463
		rs11167764	5	142099500	LOC105378204	2e-09	Genome-wide meta-analysis increases to 71 the number of confirmed Crohn's disease susceptibility loci.	21102463
		rs12722489	10	6060049	IL2RA	2.9e-09	Genome-wide meta-analysis increases to 71 the number of confirmed Crohn's disease susceptibility loci.	21102463
		rs6738825	2	198032171	PLCL1	3.5e-09	Genome-wide meta-analysis increases to 71 the number of confirmed Crohn's disease susceptibility loci.	21102463
		rs10181042	2	60997124	PUS10	6.61e-09	Genome-wide meta-analysis increases to 71 the number of confirmed Crohn's disease susceptibility loci.	21102463
		rs13073817	3	18665366	RAD23BP1 - LOC105376976	6.7e-09	Genome-wide meta-analysis increases to 71 the number of confirmed Crohn's disease susceptibility loci.	21102463
		rs17309827	6	3433084	SLC22A23	6.7e-09	Genome-wide meta-analysis increases to 71 the number of confirmed Crohn's disease susceptibility loci.	21102463
		rs2797685	1	7819003	PER3	7.1e-09	Genome-wide meta-analysis increases to 71 the number of confirmed Crohn's disease susceptibility loci.	21102463
		rs1998598	1	197758512	DENND1B	8.7e-09	Genome-wide meta-analysis increases to 71 the number of confirmed Crohn's disease susceptibility loci.	21102463
		rs736289	19	33266156	SLC7A10 - CEBPA	8.7e-09	Genome-wide meta-analysis increases to 71 the number of confirmed Crohn's disease susceptibility loci.	21102463
		rs11871801	17	42418754	PTRF	2.51e-08	Genome-wide meta-analysis increases to 71 the number of confirmed Crohn's disease susceptibility loci.	21102463
		rs11209026	1	67240275	IL23R	8.12e-161	Host-microbe interactions have shaped the genetic architecture of inflammatory bowel disease.	23128233
		rs2066847	16	50729868	NOD2	2.9e-69	Host-microbe interactions have shaped the genetic architecture of inflammatory bowel disease.	23128233
		rs6927022	6	32644620	HLA-DQA1	3.19e-52	Host-microbe interactions have shaped the genetic architecture of inflammatory bowel disease.	23128233
		rs10758669	9	4981602	HNRNPA1P41 - JAK2	7.88e-45	Host-microbe interactions have shaped the genetic architecture of inflammatory bowel disease.	23128233
		rs6871626	5	159399784	LOC285626 - LOC285627	1.43e-42	Host-microbe interactions have shaped the genetic architecture of inflammatory bowel disease.	23128233
		rs2188962	5	132435113	C5orf56	3.74e-37	Host-microbe interactions have shaped the genetic architecture of inflammatory bowel disease.	23128233
		rs11564258	12	40398498	MUC19, LOC105369736	5.04e-23	Host-microbe interactions have shaped the genetic architecture of inflammatory bowel disease.	23128233
		rs7134599	12	68106295	LOC107984526	1.22e-22	Host-microbe interactions have shaped the genetic architecture of inflammatory bowel disease.	23128233
		rs6017342	20	44436388	HNF4A - LINC01430	1.43e-21	Host-microbe interactions have shaped the genetic architecture of inflammatory bowel disease.	23128233
		rs3091316	17	34266955	CCL2 - CCL7	5.26e-20	Host-microbe interactions have shaped the genetic architecture of inflammatory bowel disease.	23128233
		rs6568421	6	105987150	RN7SKP211 - PRDM1	2.52e-17	Host-microbe interactions have shaped the genetic architecture of inflammatory bowel disease.	23128233
		rs917997	2	102454108	IL18RAP - SLC9A4	6.17e-17	Host-microbe interactions have shaped the genetic architecture of inflammatory bowel disease.	23128233
		rs2266959	22	21568615	UBE2L3	1.39e-16	Host-microbe interactions have shaped the genetic architecture of inflammatory bowel disease.	23128233
		rs35675666	1	7961913	PARK7	1.12e-15	Host-microbe interactions have shaped the genetic architecture of inflammatory bowel disease.	23128233
		rs6545800	2	24896016	ADCY3	9.4e-15	Host-microbe interactions have shaped the genetic architecture of inflammatory bowel disease.	23128233
		rs6586030	10	80494291	TSPAN14	1.27e-14	Host-microbe interactions have shaped the genetic architecture of inflammatory bowel disease.	23128233
		rs9557195	13	99304368	UBAC2, GPR183	2.37e-14	Host-microbe interactions have shaped the genetic architecture of inflammatory bowel disease.	23128233
		rs2412970	22	30090837	HORMAD2	2.7e-14	Host-microbe interactions have shaped the genetic architecture of inflammatory bowel disease.	23128233
		rs9264942	6	31306603	LOC105375015	7.26e-14	Host-microbe interactions have shaped the genetic architecture of inflammatory bowel disease.	23128233
		rs529866	16	11279463	LOC105371082	1.49e-12	Host-microbe interactions have shaped the genetic architecture of inflammatory bowel disease.	23128233
		rs1569723	20	46113425	RPL13P2 - CD40	6.55e-11	Host-microbe interactions have shaped the genetic architecture of inflammatory bowel disease.	23128233
		rs7495132	15	90629669	CRTC3-AS1, CRTC3	9.48e-11	Host-microbe interactions have shaped the genetic architecture of inflammatory bowel disease.	23128233
		rs4246215	11	61796827	FEN1	1.49e-10	Host-microbe interactions have shaped the genetic architecture of inflammatory bowel disease.	23128233
		rs1734907	7	100717894	POP7 - EPO	1.92e-10	Host-microbe interactions have shaped the genetic architecture of inflammatory bowel disease.	23128233
		rs6142618	20	32137845	TM9SF4	6.05e-10	Host-microbe interactions have shaped the genetic architecture of inflammatory bowel disease.	23128233
		rs10896794	11	58571651	LPXN	6.8e-10	Host-microbe interactions have shaped the genetic architecture of inflammatory bowel disease.	23128233
		rs4911259	20	32788476	DNMT3B	1.2e-09	Host-microbe interactions have shaped the genetic architecture of inflammatory bowel disease.	23128233
		rs798502	7	2750246	GNA12, AMZ1	1.23e-09	Host-microbe interactions have shaped the genetic architecture of inflammatory bowel disease.	23128233
		rs10521318	16	85977731	LOC105371388 - LOC105371389	1.41e-09	Host-microbe interactions have shaped the genetic architecture of inflammatory bowel disease.	23128233
		rs1991866	8	129611859	CCDC26	1.65e-09	Host-microbe interactions have shaped the genetic architecture of inflammatory bowel disease.	23128233
		rs11672983	19	54871595	RNU6-222P - FCAR	2.48e-09	Host-microbe interactions have shaped the genetic architecture of inflammatory bowel disease.	23128233
		rs1728918	2	27412596	PPM1G - NRBP1	8.44e-09	Host-microbe interactions have shaped the genetic architecture of inflammatory bowel disease.	23128233
		rs12654812	5	177367190	RGS14	1.68e-08	Host-microbe interactions have shaped the genetic architecture of inflammatory bowel disease.	23128233
		rs12199775	6	143577757	LOC285740 - PHACTR2	1.99e-08	Host-microbe interactions have shaped the genetic architecture of inflammatory bowel disease.	23128233
		rs6592362	11	87414396	LOC107984361	2.32e-08	Host-microbe interactions have shaped the genetic architecture of inflammatory bowel disease.	23128233
		rs7911264	10	92677094	EIF2S2P3 - HHEX	2.98e-08	Host-microbe interactions have shaped the genetic architecture of inflammatory bowel disease.	23128233
		rs194749	14	68807188	ZFP36L1 - MAGOH3P	3.86e-08	Host-microbe interactions have shaped the genetic architecture of inflammatory bowel disease.	23128233
		rs11168249	12	47814585	HDAC7	4.59e-08	Host-microbe interactions have shaped the genetic architecture of inflammatory bowel disease.	23128233
		rs9268853	6	32461866	HLA-DRB9 - HLA-DRB5	1.35e-55	Meta-analysis identifies 29 additional ulcerative colitis risk loci, increasing the number of confirmed associations to 47.	21297633
		rs6584283	10	99530544	LINC01475	8.46e-21	Meta-analysis identifies 29 additional ulcerative colitis risk loci, increasing the number of confirmed associations to 47.	21297633
		rs16940202	16	85980635	LOC105371388 - LOC105371389	5.96e-19	Meta-analysis identifies 29 additional ulcerative colitis risk loci, increasing the number of confirmed associations to 47.	21297633
		rs9822268	3	49682296	APEH	1.6e-17	Meta-analysis identifies 29 additional ulcerative colitis risk loci, increasing the number of confirmed associations to 47.	21297633
		rs4510766	7	107852344	PIGCP2 - LOC105375444	2e-16	Meta-analysis identifies 29 additional ulcerative colitis risk loci, increasing the number of confirmed associations to 47.	21297633
		rs678170	11	114561234	NXPE2	4.65e-14	Meta-analysis identifies 29 additional ulcerative colitis risk loci, increasing the number of confirmed associations to 47.	21297633
		rs7524102	1	22371954	LOC101060363 - LOC105376856	1.65e-13	Meta-analysis identifies 29 additional ulcerative colitis risk loci, increasing the number of confirmed associations to 47.	21297633
		rs1297265	21	15444732	LOC101927745	6.99e-13	Meta-analysis identifies 29 additional ulcerative colitis risk loci, increasing the number of confirmed associations to 47.	21297633
		rs2310173	2	102047167	LOC107985926 - IL1R1	3.17e-12	Meta-analysis identifies 29 additional ulcerative colitis risk loci, increasing the number of confirmed associations to 47.	21297633
		rs267939	5	10752203	DAP	6.01e-12	Meta-analysis identifies 29 additional ulcerative colitis risk loci, increasing the number of confirmed associations to 47.	21297633
		rs2872507	17	39884510	ZPBP2 - GSDMB	5.44e-11	Meta-analysis identifies 29 additional ulcerative colitis risk loci, increasing the number of confirmed associations to 47.	21297633
		rs2838519	21	44195140	LOC105377139 - LOC107983952	6.41e-11	Meta-analysis identifies 29 additional ulcerative colitis risk loci, increasing the number of confirmed associations to 47.	21297633
		rs4676406	2	240639691	GPR35 - LOC100420500	8.32e-11	Meta-analysis identifies 29 additional ulcerative colitis risk loci, increasing the number of confirmed associations to 47.	21297633
		rs11676348	2	218145423	CXCR2 - CXCR1	1.25e-10	Meta-analysis identifies 29 additional ulcerative colitis risk loci, increasing the number of confirmed associations to 47.	21297633
		rs2297441	20	63696229	RTEL1-TNFRSF6B, RTEL1	1.7e-10	Meta-analysis identifies 29 additional ulcerative colitis risk loci, increasing the number of confirmed associations to 47.	21297633
		rs943072	6	43828231	LOC105375070 - LOC107986598	2.37e-10	Meta-analysis identifies 29 additional ulcerative colitis risk loci, increasing the number of confirmed associations to 47.	21297633
		rs12261843	10	35265126	CCNY	7.09e-10	Meta-analysis identifies 29 additional ulcerative colitis risk loci, increasing the number of confirmed associations to 47.	21297633
		rs6451493	5	40410833	LOC105374736 - LOC105374737	2.8e-09	Meta-analysis identifies 29 additional ulcerative colitis risk loci, increasing the number of confirmed associations to 47.	21297633
		rs734999	1	2581777	LOC100996583	3.34e-09	Meta-analysis identifies 29 additional ulcerative colitis risk loci, increasing the number of confirmed associations to 47.	21297633
		rs6911490	6	106074152	PRDM1	1.01e-08	Meta-analysis identifies 29 additional ulcerative colitis risk loci, increasing the number of confirmed associations to 47.	21297633
		rs4728142	7	128933913	LOC392787 - IRF5	1.74e-08	Meta-analysis identifies 29 additional ulcerative colitis risk loci, increasing the number of confirmed associations to 47.	21297633
		rs11739663	5	593968	LOC105374607 - LOC105374608	2.8e-08	Meta-analysis identifies 29 additional ulcerative colitis risk loci, increasing the number of confirmed associations to 47.	21297633
		rs6499188	16	68640885	ZFP90 - CDH3	3.97e-08	Meta-analysis identifies 29 additional ulcerative colitis risk loci, increasing the number of confirmed associations to 47.	21297633
		rs3194051	5	35876172	IL7R	4.22e-08	Meta-analysis identifies 29 additional ulcerative colitis risk loci, increasing the number of confirmed associations to 47.	21297633
		rs9268877	6	32463370	HLA-DRB9 - HLA-DRB5	6.48e-18	Sequence variants in IL10, ARPC2 and multiple other loci contribute to ulcerative colitis susceptibility.	18836448
		rs9292777	5	40437846	LOC105374736 - LOC105374737	3.2e-18	Sequence variants in the autophagy gene IRGM and multiple other replicating loci contribute to Crohn's disease susceptibility.	17554261
		rs13361189	5	150843825	SMIM3 - IRGM	2.09e-10	Sequence variants in the autophagy gene IRGM and multiple other replicating loci contribute to Crohn's disease susceptibility.	17554261
		rs10883365	10	99528007	LINC01475	3.71e-10	Sequence variants in the autophagy gene IRGM and multiple other replicating loci contribute to Crohn's disease susceptibility.	17554261
		rs10801047	1	191590226	LOC105371660 - LOC107985457	2.83e-08	Sequence variants in the autophagy gene IRGM and multiple other replicating loci contribute to Crohn's disease susceptibility.	17554261
		rs9858542	3	49664550	BSN	4.91e-08	Sequence variants in the autophagy gene IRGM and multiple other replicating loci contribute to Crohn's disease susceptibility.	17554261
		rs2241880	2	233274722	ATG16L1	1.44e-12	A genome-wide scan of Ashkenazi Jewish Crohn's disease suggests novel susceptibility loci.	22412388
		rs9258260	6	29755384	IFITM4P - 3.8-1.5	1.74e-10	A genome-wide scan of Ashkenazi Jewish Crohn's disease suggests novel susceptibility loci.	22412388
		rs6545946	2	62486398	LOC105374764, TMEM17	7.01e-09	A genome-wide scan of Ashkenazi Jewish Crohn's disease suggests novel susceptibility loci.	22412388
		rs7076156	10	62655424	LOC105378327, ZNF365	7.29e-09	A genome-wide scan of Ashkenazi Jewish Crohn's disease suggests novel susceptibility loci.	22412388
		rs11229030	11	57435536	SLC43A3 - RNA5SP341	8.45e-09	A genome-wide scan of Ashkenazi Jewish Crohn's disease suggests novel susceptibility loci.	22412388
		rs7705924	5	102611094	LINC00491, LINC00492	1.78e-08	A genome-wide scan of Ashkenazi Jewish Crohn's disease suggests novel susceptibility loci.	22412388
		rs12677663	8	73095112	SBSPON - LOC107986891	1.96e-08	A genome-wide scan of Ashkenazi Jewish Crohn's disease suggests novel susceptibility loci.	22412388
		rs10734105	10	131373856	LOC101927461 - LINC01164	3.34e-08	A genome-wide scan of Ashkenazi Jewish Crohn's disease suggests novel susceptibility loci.	22412388
		rs3091338	5	132067045	IL3 - CSF2	4.47e-08	A genome-wide scan of Ashkenazi Jewish Crohn's disease suggests novel susceptibility loci.	22412388
		rs6740847	2	181443625	LOC101927156 - ITGA4	1.22e-13	Genome-wide association study implicates immune activation of multiple integrin genes in inflammatory bowel disease.	28067908
		rs11548656	16	81883307	PLCG2	5.18e-11	Genome-wide association study implicates immune activation of multiple integrin genes in inflammatory bowel disease.	28067908
		rs243505	7	148738247	CUL1	3.04e-10	Genome-wide association study implicates immune activation of multiple integrin genes in inflammatory bowel disease.	28067908
		rs111456533	10	124750812	FAM53B - METTL10	1.18e-09	Genome-wide association study implicates immune activation of multiple integrin genes in inflammatory bowel disease.	28067908
		rs2593855	3	71126344	FOXP1	2.54e-09	Genome-wide association study implicates immune activation of multiple integrin genes in inflammatory bowel disease.	28067908
		rs59043219	1	209797265	IRF6	1.09e-08	Genome-wide association study implicates immune activation of multiple integrin genes in inflammatory bowel disease.	28067908
		rs4256018	20	6113242	FERMT1	1.23e-08	Genome-wide association study implicates immune activation of multiple integrin genes in inflammatory bowel disease.	28067908
		rs144344067	2	186711652	FAM171B	1.29e-08	Genome-wide association study implicates immune activation of multiple integrin genes in inflammatory bowel disease.	28067908
		rs503734	3	101304904	IMPG2	2.67e-08	Genome-wide association study implicates immune activation of multiple integrin genes in inflammatory bowel disease.	28067908
		rs76527535	2	241545286	BOK-AS1	2.87e-08	Genome-wide association study implicates immune activation of multiple integrin genes in inflammatory bowel disease.	28067908
		rs67289879	6	42039665	CCND3	3.04e-08	Genome-wide association study implicates immune activation of multiple integrin genes in inflammatory bowel disease.	28067908
		rs149169037	7	20537675	ITGB8 - EEF1A1P27	3.26e-08	Genome-wide association study implicates immune activation of multiple integrin genes in inflammatory bowel disease.	28067908
		rs11768365	7	6505557	GRID2IP	3.88e-08	Genome-wide association study implicates immune activation of multiple integrin genes in inflammatory bowel disease.	28067908
		rs11734570	4	38586832	LOC105374411 - LOC102723415	4.8e-08	Genome-wide association study implicates immune activation of multiple integrin genes in inflammatory bowel disease.	28067908
		rs212402	6	159051263	LOC105378083	8e-09	Genome-wide association study of celiac disease in North America confirms FRMD4B as new celiac locus.	24999842
		rs2474619	6	90170316	BACH2	2e-08	Genome-wide association study of celiac disease in North America confirms FRMD4B as new celiac locus.	24999842
	Celiac disease	rs13096142	3	46240253	CCR3	4e-08	Genome-wide association study of celiac disease in North America confirms FRMD4B as new celiac locus.	24999842
		rs2187668	6	32638107	HLA-DQA1, LOC107986589	1e-50	Multiple common variants for celiac disease influencing immune gene expression.	20190752
		rs1464510	3	188394766	LPP	2.98e-40	Multiple common variants for celiac disease influencing immune gene expression.	20190752
		rs17810546	3	159947262	IL12A-AS1	3.98e-28	Multiple common variants for celiac disease influencing immune gene expression.	20190752
		rs13151961	4	122194347	KIAA1109	2.18e-27	Multiple common variants for celiac disease influencing immune gene expression.	20190752
		rs653178	12	111569952	ATXN2	7.15e-21	Multiple common variants for celiac disease influencing immune gene expression.	20190752
		rs2327832	6	137651931	BTF3L4P3 - LOC102723649	4.46e-19	Multiple common variants for celiac disease influencing immune gene expression.	20190752
		rs2816316	1	192567683	LOC105371664	2.2e-17	Multiple common variants for celiac disease influencing immune gene expression.	20190752
		rs13098911	3	46193709	LOC105377067 - CCR1	3.26e-17	Multiple common variants for celiac disease influencing immune gene expression.	20190752
		rs11221332	11	128511079	ETS1	5.28e-16	Multiple common variants for celiac disease influencing immune gene expression.	20190752
		rs917997	2	102454108	IL18RAP - SLC9A4	1.11e-15	Multiple common variants for celiac disease influencing immune gene expression.	20190752
		rs1738074	6	159044945	TAGAP, LOC105378083	2.94e-15	Multiple common variants for celiac disease influencing immune gene expression.	20190752
		rs802734	6	127957653	THEMIS - PTPRK	2.62e-14	Multiple common variants for celiac disease influencing immune gene expression.	20190752
		rs13003464	2	60959694	PUS10	3.71e-13	Multiple common variants for celiac disease influencing immune gene expression.	20190752
		rs13010713	2	181131318	LOC101927156	4.74e-11	Multiple common variants for celiac disease influencing immune gene expression.	20190752
		rs10903122	1	24977085	RUNX3 - MIR4425	1.73e-10	Multiple common variants for celiac disease influencing immune gene expression.	20190752
		rs1893217	18	12809341	PTPN2	2.52e-10	Multiple common variants for celiac disease influencing immune gene expression.	20190752
		rs10806425	6	90216893	BACH2	3.89e-10	Multiple common variants for celiac disease influencing immune gene expression.	20190752
		rs1250552	10	79298270	ZMIZ1	9.09e-10	Multiple common variants for celiac disease influencing immune gene expression.	20190752
		rs4819388	21	44227538	ICOSLG	2.46e-09	Multiple common variants for celiac disease influencing immune gene expression.	20190752
		rs13314993	3	32973977	LOC105377022	3.27e-09	Multiple common variants for celiac disease influencing immune gene expression.	20190752
		rs3748816	1	2595307	MMEL1	3.28e-09	Multiple common variants for celiac disease influencing immune gene expression.	20190752
		rs9792269	8	128252343	RN7SKP226 - LINC00824	3.28e-09	Multiple common variants for celiac disease influencing immune gene expression.	20190752
		rs296547	1	200923009	MROH3P	4.11e-09	Multiple common variants for celiac disease influencing immune gene expression.	20190752
		rs4675374	2	203937855	LOC101927840, ICOS	5.79e-09	Multiple common variants for celiac disease influencing immune gene expression.	20190752
		rs17035378	2	68371823	PLEK	7.79e-09	Multiple common variants for celiac disease influencing immune gene expression.	20190752
		rs11712165	3	119399949	ARHGAP31	8.03e-09	Multiple common variants for celiac disease influencing immune gene expression.	20190752
		rs12928822	16	11310036	LOC105371082	3.12e-08	Multiple common variants for celiac disease influencing immune gene expression.	20190752
		rs6822844	4	122588266	IL2 - IL21	3e-13	Newly identified genetic risk variants for celiac disease related to the immune response.	18311140
		rs13015714	2	102355405	IL1RL1 - IL18R1	4e-09	Newly identified genetic risk variants for celiac disease related to the immune response.	18311140
	Chronic pancreatitis	rs2855983	7	142770582	TRB	5e-40	Genome-wide association study identifies inversion in the CTRB1-CTRB2 locus to modify risk for alcoholic and non-alcoholic chronic pancreatitis.	28754779
		rs12688091	X	107131628	LOC644563, NUP62CL	1e-32	Genome-wide association study identifies inversion in the CTRB1-CTRB2 locus to modify risk for alcoholic and non-alcoholic chronic pancreatitis.	28754779
		rs4726575	7	142747017	TRB, PRSS1	9e-32	Genome-wide association study identifies inversion in the CTRB1-CTRB2 locus to modify risk for alcoholic and non-alcoholic chronic pancreatitis.	28754779
		rs7057398	X	106901299	CLDN2, RIPPLY1	2e-29	Genome-wide association study identifies inversion in the CTRB1-CTRB2 locus to modify risk for alcoholic and non-alcoholic chronic pancreatitis.	28754779
		rs55833042	7	142758924	TRB	3e-29	Genome-wide association study identifies inversion in the CTRB1-CTRB2 locus to modify risk for alcoholic and non-alcoholic chronic pancreatitis.	28754779
		rs6953502	7	142723525	TRB	2e-25	Genome-wide association study identifies inversion in the CTRB1-CTRB2 locus to modify risk for alcoholic and non-alcoholic chronic pancreatitis.	28754779
		rs148655558	X	106768355	RNF128	1e-24	Genome-wide association study identifies inversion in the CTRB1-CTRB2 locus to modify risk for alcoholic and non-alcoholic chronic pancreatitis.	28754779
		rs78907924	─	─	─	2e-23	Genome-wide association study identifies inversion in the CTRB1-CTRB2 locus to modify risk for alcoholic and non-alcoholic chronic pancreatitis.	28754779
		rs58854468	─	─	─	4e-23	Genome-wide association study identifies inversion in the CTRB1-CTRB2 locus to modify risk for alcoholic and non-alcoholic chronic pancreatitis.	28754779
		rs2734221	7	142779536	TRB, WBP1LP1	1e-22	Genome-wide association study identifies inversion in the CTRB1-CTRB2 locus to modify risk for alcoholic and non-alcoholic chronic pancreatitis.	28754779
		rs4726580	7	142762217	TRB, PRSS3P1	1e-22	Genome-wide association study identifies inversion in the CTRB1-CTRB2 locus to modify risk for alcoholic and non-alcoholic chronic pancreatitis.	28754779
		rs3857776	7	142751439	TRB, PRSS1	2e-22	Genome-wide association study identifies inversion in the CTRB1-CTRB2 locus to modify risk for alcoholic and non-alcoholic chronic pancreatitis.	28754779
		rs545634	1	15443607	CTRC	3e-22	Genome-wide association study identifies inversion in the CTRB1-CTRB2 locus to modify risk for alcoholic and non-alcoholic chronic pancreatitis.	28754779
		rs35031873	7	142758607	TRB	6e-22	Genome-wide association study identifies inversion in the CTRB1-CTRB2 locus to modify risk for alcoholic and non-alcoholic chronic pancreatitis.	28754779
		rs138700403	7	142768604	TRB	2e-21	Genome-wide association study identifies inversion in the CTRB1-CTRB2 locus to modify risk for alcoholic and non-alcoholic chronic pancreatitis.	28754779
		rs6464530	─	─	─	6e-21	Genome-wide association study identifies inversion in the CTRB1-CTRB2 locus to modify risk for alcoholic and non-alcoholic chronic pancreatitis.	28754779
		rs4145394	─	─	─	9e-21	Genome-wide association study identifies inversion in the CTRB1-CTRB2 locus to modify risk for alcoholic and non-alcoholic chronic pancreatitis.	28754779
		rs66491909	X	106732269	RNF128	6e-20	Genome-wide association study identifies inversion in the CTRB1-CTRB2 locus to modify risk for alcoholic and non-alcoholic chronic pancreatitis.	28754779
		rs60095957	7	142742709	TRB, PRSS1	8e-20	Genome-wide association study identifies inversion in the CTRB1-CTRB2 locus to modify risk for alcoholic and non-alcoholic chronic pancreatitis.	28754779
		rs12014762	X	106940440	MORC4	2e-19	Genome-wide association study identifies inversion in the CTRB1-CTRB2 locus to modify risk for alcoholic and non-alcoholic chronic pancreatitis.	28754779
		rs73742446	─	─	─	4e-19	Genome-wide association study identifies inversion in the CTRB1-CTRB2 locus to modify risk for alcoholic and non-alcoholic chronic pancreatitis.	28754779
		rs144184641	7	142775173	TRB	7e-19	Genome-wide association study identifies inversion in the CTRB1-CTRB2 locus to modify risk for alcoholic and non-alcoholic chronic pancreatitis.	28754779
		rs11762011	─	─	─	2e-18	Genome-wide association study identifies inversion in the CTRB1-CTRB2 locus to modify risk for alcoholic and non-alcoholic chronic pancreatitis.	28754779
		rs149506335	7	142776454	TRB	2e-18	Genome-wide association study identifies inversion in the CTRB1-CTRB2 locus to modify risk for alcoholic and non-alcoholic chronic pancreatitis.	28754779
		rs192514996	7	142778229	TRB	5e-18	Genome-wide association study identifies inversion in the CTRB1-CTRB2 locus to modify risk for alcoholic and non-alcoholic chronic pancreatitis.	28754779
		rs4457242	7	142777285	TRB	8e-18	Genome-wide association study identifies inversion in the CTRB1-CTRB2 locus to modify risk for alcoholic and non-alcoholic chronic pancreatitis.	28754779
		rs73742434	─	─	─	8e-18	Genome-wide association study identifies inversion in the CTRB1-CTRB2 locus to modify risk for alcoholic and non-alcoholic chronic pancreatitis.	28754779
		rs147767607	7	142769934	TRB	1e-17	Genome-wide association study identifies inversion in the CTRB1-CTRB2 locus to modify risk for alcoholic and non-alcoholic chronic pancreatitis.	28754779
		rs1285582	X	107123872	NUP62CL	2e-17	Genome-wide association study identifies inversion in the CTRB1-CTRB2 locus to modify risk for alcoholic and non-alcoholic chronic pancreatitis.	28754779
		rs10243591	7	142725721	TRB	1e-16	Genome-wide association study identifies inversion in the CTRB1-CTRB2 locus to modify risk for alcoholic and non-alcoholic chronic pancreatitis.	28754779
		rs12562037	1	15456025	CTRC - CELA2A	1e-16	Genome-wide association study identifies inversion in the CTRB1-CTRB2 locus to modify risk for alcoholic and non-alcoholic chronic pancreatitis.	28754779
		rs12539868	─	─	─	2e-16	Genome-wide association study identifies inversion in the CTRB1-CTRB2 locus to modify risk for alcoholic and non-alcoholic chronic pancreatitis.	28754779
		rs4725602	─	─	─	3e-16	Genome-wide association study identifies inversion in the CTRB1-CTRB2 locus to modify risk for alcoholic and non-alcoholic chronic pancreatitis.	28754779
		rs6622126	X	106956972	MORC4	8e-16	Genome-wide association study identifies inversion in the CTRB1-CTRB2 locus to modify risk for alcoholic and non-alcoholic chronic pancreatitis.	28754779
		rs146437551	5	147808460	JAKMIP2 - SPINK1	3e-15	Genome-wide association study identifies inversion in the CTRB1-CTRB2 locus to modify risk for alcoholic and non-alcoholic chronic pancreatitis.	28754779
		rs58649169	─	─	─	3e-15	Genome-wide association study identifies inversion in the CTRB1-CTRB2 locus to modify risk for alcoholic and non-alcoholic chronic pancreatitis.	28754779
		rs148916504	7	142770747	TRB	5e-15	Genome-wide association study identifies inversion in the CTRB1-CTRB2 locus to modify risk for alcoholic and non-alcoholic chronic pancreatitis.	28754779
		rs12008279	X	106917472	CLDN2	6e-15	Genome-wide association study identifies inversion in the CTRB1-CTRB2 locus to modify risk for alcoholic and non-alcoholic chronic pancreatitis.	28754779
		rs73742436	─	─	─	3e-14	Genome-wide association study identifies inversion in the CTRB1-CTRB2 locus to modify risk for alcoholic and non-alcoholic chronic pancreatitis.	28754779
		rs12847061	X	107230661	PIH1D3	4e-14	Genome-wide association study identifies inversion in the CTRB1-CTRB2 locus to modify risk for alcoholic and non-alcoholic chronic pancreatitis.	28754779
		rs1800907	7	142800425	TRB	8e-14	Genome-wide association study identifies inversion in the CTRB1-CTRB2 locus to modify risk for alcoholic and non-alcoholic chronic pancreatitis.	28754779
		rs34689332	X	106834287	TBC1D8B	4e-13	Genome-wide association study identifies inversion in the CTRB1-CTRB2 locus to modify risk for alcoholic and non-alcoholic chronic pancreatitis.	28754779
		rs57586289	7	142798480	TRB	5e-13	Genome-wide association study identifies inversion in the CTRB1-CTRB2 locus to modify risk for alcoholic and non-alcoholic chronic pancreatitis.	28754779
		rs62605968	X	106829297	TBC1D8B	1e-12	Genome-wide association study identifies inversion in the CTRB1-CTRB2 locus to modify risk for alcoholic and non-alcoholic chronic pancreatitis.	28754779
		rs141052845	X	106964394	MORC4	2e-12	Genome-wide association study identifies inversion in the CTRB1-CTRB2 locus to modify risk for alcoholic and non-alcoholic chronic pancreatitis.	28754779
		rs7795886	─	─	─	2e-12	Genome-wide association study identifies inversion in the CTRB1-CTRB2 locus to modify risk for alcoholic and non-alcoholic chronic pancreatitis.	28754779
		rs144878061	1	15456801	CELA2A	1e-11	Genome-wide association study identifies inversion in the CTRB1-CTRB2 locus to modify risk for alcoholic and non-alcoholic chronic pancreatitis.	28754779
		rs10465287	X	106545130	LOC105373306 - SERPINA7P1	4e-11	Genome-wide association study identifies inversion in the CTRB1-CTRB2 locus to modify risk for alcoholic and non-alcoholic chronic pancreatitis.	28754779
		rs148771016	X	107318205	MYCLP1 - DNAJA1P3	4e-11	Genome-wide association study identifies inversion in the CTRB1-CTRB2 locus to modify risk for alcoholic and non-alcoholic chronic pancreatitis.	28754779
		rs17251	7	142715462	TRB, TRBV27	5e-11	Genome-wide association study identifies inversion in the CTRB1-CTRB2 locus to modify risk for alcoholic and non-alcoholic chronic pancreatitis.	28754779
		rs55916943	X	106313139	MUM1L1 - LOC107178920	2e-10	Genome-wide association study identifies inversion in the CTRB1-CTRB2 locus to modify risk for alcoholic and non-alcoholic chronic pancreatitis.	28754779
		rs73740310	─	─	─	3e-10	Genome-wide association study identifies inversion in the CTRB1-CTRB2 locus to modify risk for alcoholic and non-alcoholic chronic pancreatitis.	28754779
		rs10808021	─	─	─	5e-10	Genome-wide association study identifies inversion in the CTRB1-CTRB2 locus to modify risk for alcoholic and non-alcoholic chronic pancreatitis.	28754779
		rs12857658	X	107281285	MYCLP1 - DNAJA1P3	6e-10	Genome-wide association study identifies inversion in the CTRB1-CTRB2 locus to modify risk for alcoholic and non-alcoholic chronic pancreatitis.	28754779
		rs2226970	7	142648438	TRB	6e-10	Genome-wide association study identifies inversion in the CTRB1-CTRB2 locus to modify risk for alcoholic and non-alcoholic chronic pancreatitis.	28754779
		rs13239736	7	142620329	TRB	8e-10	Genome-wide association study identifies inversion in the CTRB1-CTRB2 locus to modify risk for alcoholic and non-alcoholic chronic pancreatitis.	28754779
		rs6693417	1	15436844	EFHD2 - CTRC	8e-10	Genome-wide association study identifies inversion in the CTRB1-CTRB2 locus to modify risk for alcoholic and non-alcoholic chronic pancreatitis.	28754779
		rs6954663	7	142683246	TRB	1e-09	Genome-wide association study identifies inversion in the CTRB1-CTRB2 locus to modify risk for alcoholic and non-alcoholic chronic pancreatitis.	28754779
		rs149055315	X	106730962	RNF128	2e-09	Genome-wide association study identifies inversion in the CTRB1-CTRB2 locus to modify risk for alcoholic and non-alcoholic chronic pancreatitis.	28754779
		rs8055167	16	75220991	CTRB1	4e-09	Genome-wide association study identifies inversion in the CTRB1-CTRB2 locus to modify risk for alcoholic and non-alcoholic chronic pancreatitis.	28754779
		rs4645995	1	15522508	CASP9	6e-09	Genome-wide association study identifies inversion in the CTRB1-CTRB2 locus to modify risk for alcoholic and non-alcoholic chronic pancreatitis.	28754779
		rs1285594	X	107158099	NUP62CL	1e-08	Genome-wide association study identifies inversion in the CTRB1-CTRB2 locus to modify risk for alcoholic and non-alcoholic chronic pancreatitis.	28754779
		rs6622208	X	107289163	MYCLP1 - DNAJA1P3	2e-08	Genome-wide association study identifies inversion in the CTRB1-CTRB2 locus to modify risk for alcoholic and non-alcoholic chronic pancreatitis.	28754779
		rs77808099	1	15618437	DDI2	3e-08	Genome-wide association study identifies inversion in the CTRB1-CTRB2 locus to modify risk for alcoholic and non-alcoholic chronic pancreatitis.	28754779
		rs6935723	6	32713892	MTCO3P1 - LOC102725019	1e-21	HLA-DQA1-HLA-DRB1 variants confer susceptibility to pancreatitis induced by thiopurine immunosuppressants.	25217962
		rs12688220	X	107001537	MORC4 - EEF1A1P40	2e-22	Common genetic variants in the CLDN2 and PRSS1-PRSS2 loci alter risk for alcohol-related and sporadic pancreatitis.	23143602
		rs10273639	7	142749077	TRB, PRSS1	2e-14	Common genetic variants in the CLDN2 and PRSS1-PRSS2 loci alter risk for alcohol-related and sporadic pancreatitis.	23143602
	Primary sclerosing cholangitis	rs3197999	3	49684099	MST1	5e-26	Genome-wide association study of primary sclerosing cholangitis identifies new risk loci and quantifies the genetic relationship with inflammatory bowel disease.	27992413
		rs4147359	10	6066476	IL2RA - RPL32P23	8e-17	Genome-wide association study of primary sclerosing cholangitis identifies new risk loci and quantifies the genetic relationship with inflammatory bowel disease.	27992413
		rs7426056	2	203747335	CD28 - KRT18P39	2e-16	Genome-wide association study of primary sclerosing cholangitis identifies new risk loci and quantifies the genetic relationship with inflammatory bowel disease.	27992413
		rs80060485	3	71104739	FOXP1	3e-15	Genome-wide association study of primary sclerosing cholangitis identifies new risk loci and quantifies the genetic relationship with inflammatory bowel disease.	27992413
		rs13140464	4	122578590	IL2 - IL21	1e-13	Genome-wide association study of primary sclerosing cholangitis identifies new risk loci and quantifies the genetic relationship with inflammatory bowel disease.	27992413
		rs663743	11	64340263	CCDC88B, LOC102723878	2e-13	Genome-wide association study of primary sclerosing cholangitis identifies new risk loci and quantifies the genetic relationship with inflammatory bowel disease.	27992413
		rs725613	16	11075826	CLEC16A	4e-13	Genome-wide association study of primary sclerosing cholangitis identifies new risk loci and quantifies the genetic relationship with inflammatory bowel disease.	27992413
		rs3184504	12	111446804	SH2B3	4e-13	Genome-wide association study of primary sclerosing cholangitis identifies new risk loci and quantifies the genetic relationship with inflammatory bowel disease.	27992413
		rs2836883	21	39094818	LOC107985484 - RPL23AP12	4e-13	Genome-wide association study of primary sclerosing cholangitis identifies new risk loci and quantifies the genetic relationship with inflammatory bowel disease.	27992413
		rs3748816	1	2595307	MMEL1	5e-13	Genome-wide association study of primary sclerosing cholangitis identifies new risk loci and quantifies the genetic relationship with inflammatory bowel disease.	27992413
		rs60652743	19	46702450	PRKD2	2e-12	Genome-wide association study of primary sclerosing cholangitis identifies new risk loci and quantifies the genetic relationship with inflammatory bowel disease.	27992413
		rs1893592	21	42434957	UBASH3A	2e-12	Genome-wide association study of primary sclerosing cholangitis identifies new risk loci and quantifies the genetic relationship with inflammatory bowel disease.	27992413
		rs1788097	18	69876452	CD226	7e-12	Genome-wide association study of primary sclerosing cholangitis identifies new risk loci and quantifies the genetic relationship with inflammatory bowel disease.	27992413
		rs72837826	2	111175424	BCL2L11 - MIR4435-1HG	2e-11	Genome-wide association study of primary sclerosing cholangitis identifies new risk loci and quantifies the genetic relationship with inflammatory bowel disease.	27992413
		rs56258221	6	90320722	LOC105377891	1e-09	Genome-wide association study of primary sclerosing cholangitis identifies new risk loci and quantifies the genetic relationship with inflammatory bowel disease.	27992413
		rs61861422	10	132544853	INPP5A	1e-08	Genome-wide association study of primary sclerosing cholangitis identifies new risk loci and quantifies the genetic relationship with inflammatory bowel disease.	27992413
		rs36023390	3	71473942	FOXP1	2e-08	Genome-wide association study of primary sclerosing cholangitis identifies new risk loci and quantifies the genetic relationship with inflammatory bowel disease.	27992413
		rs145832854	22	24914162	SGSM1	3e-08	Genome-wide association study of primary sclerosing cholangitis identifies new risk loci and quantifies the genetic relationship with inflammatory bowel disease.	27992413
		rs4676410	2	240624322	GPR35	2e-09	Genome-wide association analysis in primary sclerosing cholangitis and ulcerative colitis identifies risk loci at GPR35 and TCF4.	22821403
		rs3749171	2	240630275	GPR35	3e-09	Genome-wide association analysis in primary sclerosing cholangitis and ulcerative colitis identifies risk loci at GPR35 and TCF4.	22821403
		rs1452787	18	55539976	TCF4	3e-08	Genome-wide association analysis in primary sclerosing cholangitis and ulcerative colitis identifies risk loci at GPR35 and TCF4.	22821403
		rs6720394	2	111231795	MIR4435-1HG	4e-08	Genome-wide association analysis in primary sclerosing cholangitis identifies two non-HLA susceptibility loci.	21151127
	Abbreviations: Chr., chromosome; SNP, single-nucleotide polymorphism.
	a The SNPs (P-value < 5×10-8) reported in GWAS that were curated by NHGRI-EBI Catalog as of October 9, 2017. Additional SNPs from published GWAS were also added to this list if they met the significant level criteria.
	b SNP position according to NCBI Human Genome Build 38 patch release 12 (GRCh38.p12).

## Sheet: Supp. Table S2
	Supplementary Table S2. Association of inflammatory intestinal disease groups with risk of PDAC by study design in participants of European ancestry from PanScan and PanC4 studiesa
	Study design	Disease group	Index-SNP defined region, n	SNP, n	P-value
	Cohortb	Ulcerative colitis	98	726	0.72
		Crohn's disease	149	982	0.5
		Inflammatory bowel disease	208	1384	0.63
		Celiac disease	21	148	0.11
		Chronic pancreatitis	11	35	0.37
		Primary sclerosing cholangitis	15	109	0.53
	Case-controlc	Ulcerative colitis	99	728	0.022
		Crohn's disease	151	997	0.0069
		Inflammatory bowel disease	211	1403	0.014
		Celiac disease	21	148	0.78
		Chronic pancreatitis	11	35	3.2 × 10-6
		Primary sclerosing cholangitis	15	109	0.018
	Abbreviations: PDAC, pancreatic ductal adenocarcinoma; SNP, single-nucleotide polymorphism.
	a The analysis (N=8,384 cases and 11,955 controls) was adjusted for age, sex, study, geographic region, and the top eigenvectors for the PanScan studies and age, sex, and the top eigenvectors for the PanC4 studies.
	b Cohort studies included PanScan Ⅰ and PanScan Ⅲ cohort studies.
	c Case-control studies included PanScan Ⅰ, PanScan Ⅱ and PanC4 case-control studies.

## Sheet: Supp. Table S3
	Supplementary Table S3. Index-SNP defined regions selected by sARTP contributing to the associations between inflammatory intestinal disease groups and PDAC in participants of European ancestry from PanScan and PanC4 studiesa
	Disease group	Index-SNP defined region	Gene	Region	SNPs, nb	P-value
	Ulcerative colitis	rs9822268	APEH	3p21.31	9	0.0029
		rs2872507	─	17q21.1	22	0.006
		rs7809799	KPNA7	7q22.1	3	0.0069
		rs4409764	LINC01475	10q24.2	17	0.0073
		rs80174646	IL23R	1p31.3	1	0.0092
		rs12946510	─	17q12	11	0.014
		rs798502	AMZ1, GNA12	7p22.3	32	0.017
		rs1182188	GNA12	7p22.2	33	0.017
		rs2413583	─	22q13.1	2	0.021
		rs7517847	IL23R	1p31.3	4	0.029
		rs9868809	CELSR3	3p21.31	12	0.031
		rs6499188	─	16q22.1	7	0.045
		rs254560	C5orf66	5q31.1	4	0.047
		rs6088765	PROCR, MMP24-AS1-EDEM2	20q11.22	1	0.047
		rs3766606	PARK7	1p36.23	12	0.058
		rs4656958	─	1q23.3	23	0.07
		rs10781499	CARD9	9q34.3	10	0.084
		rs267939	DAP	5p15.2	4	0.085
		rs7805114	─	7q31.1	7	0.089
		rs9268877	─	6p21.32	12	0.12
		rs2858829	─	6q22.1	1	0.14
		rs7404095	PRKCB	16p12.2	5	0.14
		rs6724516	─	2q37.3	2	0.16
		rs886774	─	7q31.1	10	0.16
		rs1728785	ZFP90	16q22.1	14	0.16
		rs7282490	─	21q22.3	3	0.16
		rs734999	LOC100996583	1p36.32	18	0.18
		rs4380874	─	7q31.1	10	0.18
		rs3024493	IL10	1q32.1	3	0.2
		rs483905	MAML2	11q21	7	0.22
		rs12942547	STAT3	17q21.2	4	0.23
		rs1297265	LOC101927745	21q21.1	6	0.23
	Crohn's disease	rs9858542	BSN	3p21.31	9	0.0026
		rs6651252	LINC00824	8q24.21	6	0.0055
		rs2872507	─	17q21.1	22	0.0063
		rs568617	FIBP	11q13.1	4	0.0071
		rs10883365	LINC01475	10q24.2	18	0.0079
		rs9988642	IL23R	1p31.3	1	0.0091
		rs13428812	DNMT3A	2p23.3	7	0.013
		rs359457	─	5q35.2	2	0.015
		rs12946510	─	17q12	11	0.015
		rs9491697	RSPO3	6q22.33	4	0.018
		rs2413583	─	22q13.1	2	0.022
		rs7517847	IL23R	1p31.3	4	0.029
		rs727563	ACO2	22q13.2	2	0.029
		rs9868809	CELSR3	3p21.31	12	0.031
		rs10061469	─	5q13.2	7	0.033
		rs2488389	DENND1B	1q31.3	18	0.036
		rs3897478	─	1p12	6	0.038
		rs3766606	PARK7	1p36.23	12	0.057
		rs1250546	ZMIZ1	10q22.3	5	0.068
		rs2361755	─	16q24.1	1	0.07
		rs1199103	─	10q21.1	4	0.074
		rs6708413	IL18RAP	2q12.1	1	0.08
		rs10495903	THADA	2p21	31	0.084
		rs4077515	CARD9	9q34.3	10	0.084
		rs72810983	CPEB4	5q35.2	7	0.12
		rs2930047	DAP	5p15.2	6	0.12
		rs11209003	C1orf141	1p31.3	15	0.13
		rs3853824	C17orf67	17q22	4	0.13
	Inflammatory bowel disease	rs9858542	BSN	3p21.31	9	0.0026
		rs6651252	LINC00824	8q24.21	6	0.0061
		rs7809799	KPNA7	7q22.1	3	0.0068
		rs2872507	─	17q21.1	22	0.0069
		rs10883365	LINC01475	10q24.2	18	0.0076
		rs9988642	IL23R	1p31.3	1	0.0089
		rs4256018	FERMT1	20p12.3	3	0.0097
		rs13428812	DNMT3A	2p23.3	7	0.013
		rs12946510	─	17q12	11	0.014
		rs359457	─	5q35.2	2	0.016
		rs798502	AMZ1, GNA12	7p22.3	32	0.016
		rs1182188	GNA12	7p22.2	33	0.016
		rs2413583	─	22q13.1	2	0.021
		rs1049526	BRD2	6p21.32	1	0.022
		rs7517847	IL23R	1p31.3	4	0.029
		rs7911264	─	10q23.33	4	0.03
		rs9868809	CELSR3	3p21.31	12	0.031
		rs2239802	HLA-DRA	6p21.32	5	0.031
		rs2488389	DENND1B	1q31.3	18	0.037
		rs6499188	─	16q22.1	7	0.043
		rs254560	C5orf66	5q31.1	4	0.046
		rs3766606	PARK7	1p36.23	12	0.056
		rs1250546	ZMIZ1	10q22.3	5	0.07
		rs4656958	─	1q23.3	23	0.071
		rs10521318	─	16q24.1	1	0.071
		rs1734907	─	7q22.1	3	0.073
		rs1199103	─	10q21.1	4	0.073
		rs917997	─	2q12.1	1	0.08
		rs10495903	THADA	2p21	31	0.083
		rs4077515	CARD9	9q34.3	10	0.084
	Celiac disease	rs13098911	─	3p21.31	6	0.024
		rs10903122	─	1p36.11	11	0.025
		rs9792269	─	8q24.21	2	0.062
		rs917997	─	2q12.1	1	0.079
		rs1464510	LPP	3q28	16	0.086
	Chronic pancreatitis	rs8055167	CTRB1, CTRB2	16q23.1	3	1.0 × 10-7
	Primary sclerosing cholangitis	rs3197999	MST1	3p21.31	9	0.0028
	Abbreviations: PDAC, pancreatic ductal adenocarcinoma; sARTP, summary data-based adaptive rank truncated product; SNP, single-nucleotide polymorphism.
	a The analysis (N=8,384 cases and 11,955 controls) was adjusted for age, sex, study, geographic region, and the top eigenvectors for the PanScan studies and age, sex, and the top eigenvectors for the PanC4 studies.
	b These SNPs are correlated with index SNPs at r2 > 0.80.

## Sheet: Supp. Table S4
	Supplementary Table S4. SNPs selected by sARTP that contribute to the association between inflammatory intestinal disease groups and risk of PDAC in participants of European ancestry from PanScan and PanC4 studiesa
		Index-SNP					sARTP-selected SNP									Pairwise LD analysisg
	Disease group	SNP ID	Gene	Location	Positionb	Allelesc	SNP ID	Gene	Chr.	Positionb	Allelesc	OR (95% CI)_Cohortd	OR (95% CI)_Case-controle	OR (95% CI)_Combinedf	P-value_Combined	Alleles in LDh	r2	Directioni
	Ulcerative colitis	rs9822268	APEH	3p21.31	49719729	G/A	rs9836291	BSN	3	49697459	G/A	0.98 (0.90-1.07)	0.90 (0.85-0.96)	0.93 (0.88-0.97)	0.0012	G-G/A-A	1	Opposite
							rs7614725	BSN	3	49650395	G/A	0.97 (0.89-1.05)	0.91 (0.86-0.96)	0.93 (0.88-0.97)	0.0013	G-G/A-A	0.97	Opposite
							rs11917431	BSN	3	49644012	C/T	0.97 (0.89-1.05)	0.91 (0.86-0.96)	0.93 (0.88-0.97)	0.0013	G-C/A-T	0.97	Opposite
							rs7630869	DAG1	3	49522543	C/T	0.97 (0.89-1.05)	0.91 (0.86-0.97)	0.93 (0.89-0.97)	0.0017	G-C/A-T	0.93	Opposite
							rs13062429	DAG1	3	49559485	G/A	0.96 (0.89-1.05)	0.91 (0.87-0.97)	0.93 (0.89-0.97)	0.0018	G-G/A-A	0.93	Opposite
		rs2872507	─	17q21.1	38040763	G/A	rs12936231	ZPBP2	17	38029120	C/G	0.93 (0.85-1.00)	0.93 (0.89-0.98)	0.93 (0.89-0.97)	0.0012	G-C/A-G	0.84	Opposite
							rs1453559	IKZF3	17	38020419	C/T	1.06 (0.98-1.15)	1.07 (1.02-1.13)	1.07 (1.03-1.12)	0.0017	G-T/A-C	0.83	Opposite
							rs11658278	ZPBP2	17	38031164	T/C	0.93 (0.86-1.01)	0.94 (0.89-0.98)	0.93 (0.89-0.97)	0.0017	G-T/A-C	0.87	Opposite
							rs9903250	ZPBP2	17	38031030	G/A	0.93 (0.86-1.01)	0.94 (0.89-0.98)	0.93 (0.89-0.97)	0.0018	G-G/A-A	0.87	Opposite
							rs12950209	─	17	38049102	T/C	0.93 (0.86-1.00)	0.94 (0.89-0.99)	0.93 (0.90-0.98)	0.002	G-T/A-C	0.87	Opposite
		rs7809799	KPNA7	7q22.1	98760504	A/G	rs73147654	KPNA7	7	98783782	T/C	1.21 (0.99-1.48)	1.13 (1.00-1.29)	1.16 (1.04-1.28)	0.0079	A-T/G-C	0.95	Same
							rs4454228	─	7	98753158	C/T	1.21 (1.00-1.47)	1.12 (0.99-1.27)	1.15 (1.04-1.27)	0.0091	A-C/G-T	0.98	Same
							rs75599274	KPNA7	7	98781259	A/C	1.21 (0.99-1.47)	1.13 (0.99-1.28)	1.15 (1.03-1.28)	0.01	A-A/G-C	0.97	Same
		rs4409764	─	10q24.2	101284237	G/T	rs10883361	─	10	101282968	C/T	1.02 (0.94-1.10)	1.09 (1.04-1.15)	1.07 (1.03-1.12)	0.002	G-C/T-T	0.92	Same
							rs7911680	NKX2-3	10	101293468	C/A	1.01 (0.94-1.10)	1.09 (1.04-1.15)	1.07 (1.02-1.12)	0.0022	G-C/T-A	0.96	Same
							rs10748782	─	10	101283389	G/T	1.02 (0.94-1.10)	1.09 (1.04-1.15)	1.07 (1.02-1.12)	0.0022	G-G/T-T	0.9	Same
							rs10883373	─	10	101292484	A/G	1.01 (0.94-1.10)	1.09 (1.04-1.15)	1.07 (1.02-1.11)	0.0024	G-A/T-G	0.98	Same
							rs10786556	─	10	101278324	T/C	1.00 (0.93-1.09)	1.10 (1.04-1.15)	1.07 (1.02-1.12)	0.0024	G-T/T-C	0.92	Same
		rs80174646	IL23R	1p31.3	67708155	G/T	rs148170789	IL23R	1	67710231	A/G	1.01 (0.86-1.18)	0.85 (0.77-0.94)	0.89 (0.82-0.97)	0.0087	G-A/T-G	0.98	Same
		rs12946510	─	17q12	37912377	C/T	rs9747973	─	17	37905107	C/T	1.06 (0.98-1.14)	1.07 (1.02-1.13)	1.07 (1.02-1.12)	0.0024	C-T/T-C	0.83	Opposite
							rs907091	IKZF3	17	37921742	T/C	0.94 (0.90-0.98)	0.94 (0.89-0.98)	0.94 (0.90-0.98)	0.0043	C-T/T-C	0.8	Opposite
							rs4795397	─	17	38023745	A/G	0.93 (0.86-1.01)	0.95 (0.90-1.00)	0.94 (0.90-0.98)	0.0076	C-A/T-G	0.87	Opposite
							rs9905959	ZPBP2	17	38031138	A/G	0.94 (0.86-1.01)	0.95 (0.90-1.00)	0.95 (0.91-0.99)	0.011	C-A/T-G	0.85	Opposite
							rs59716545	ZPBP2	17	38031857	T/G	0.93 (0.86-1.01)	0.95 (0.91-1.00)	0.95 (0.91-0.99)	0.013	C-T/T-G	0.85	Opposite
		rs798502	GNA12, AMZ1	7p22.3	2789880	A/C	rs798495	GNA12	7	2797267	T/C	0.95 (0.87-1.04)	0.92 (0.87-0.98)	0.93 (0.89-0.98)	0.0032	A-T/C-C	0.93	Same
							rs1182198	GNA12	7	2862906	C/T	0.93 (0.85-1.02)	0.93 (0.88-0.99)	0.93 (0.89-0.98)	0.0033	A-C/C-T	0.91	Same
							rs1182176	GNA12	7	2874601	A/G	0.94 (0.86-1.02)	0.93 (0.88-0.99)	0.93 (0.89-0.98)	0.0045	A-A/C-G	0.91	Same
							rs798526	GNA12	7	2775542	G/C	0.94 (0.86-1.03)	0.93 (0.88-0.98)	0.93 (0.89-0.98)	0.0047	A-G/C-C	0.94	Same
							rs798488	GNA12	7	2802522	T/C	0.95 (0.87-1.04)	0.93 (0.88-0.98)	0.93 (0.89-0.98)	0.0047	A-T/C-C	0.95	Same
		rs1182188	GNA12	7p22.2	2869985	T/C	rs798495	GNA12	7	2797267	T/C	0.95 (0.87-1.04)	0.92 (0.87-0.98)	0.93 (0.89-0.98)	0.0032	T-T/C-C	0.93	Same
							rs1182198	GNA12	7	2862906	C/T	0.93 (0.85-1.02)	0.93 (0.88-0.99)	0.93 (0.89-0.98)	0.0033	T-C/C-T	0.94	Same
							rs2644291	─	7	2890456	T/C	0.93 (0.86-1.02)	0.93 (0.88-0.99)	0.93 (0.89-0.98)	0.0041	T-T/C-C	0.84	Same
							rs1182176	GNA12	7	2874601	A/G	0.94 (0.86-1.02)	0.93 (0.88-0.99)	0.93 (0.89-0.98)	0.0045	T-A/C-G	0.99	Same
							rs798526	GNA12	7	2775542	G/C	0.94 (0.86-1.03)	0.93 (0.88-0.98)	0.93 (0.89-0.98)	0.0047	T-G/C-C	0.92	Same
		rs2413583	─	22q13.1	39659773	C/T	rs9611131	─	22	39662480	T/C	1.12 (1.00-1.25)	1.06 (0.99-1.14)	1.07 (1.01-1.14)	0.018	C-T/T-C	0.81	Opposite
							rs9607629	─	22	39670854	A/G	1.06 (0.95-1.18)	1.07 (1.00-1.14)	1.07 (1.01-1.13)	0.027	C-A/T-G	0.87	Opposite
		rs7517847	IL23R	1p31.3	67681669	T/G	rs11580078	IL23R	1	67669634	C/G	0.91 (0.84-0.99)	0.96 (0.91-1.01)	0.95 (0.91-0.99)	0.017	T-C/G-G	0.92	Same
							rs11576518	IL23R	1	67682196	G/A	0.92 (0.85-1.00)	0.97 (0.92-1.02)	0.95 (0.91-1.00)	0.033	T-G/G-A	1	Same
							rs2863210	IL23R	1	67670768	T/C	0.92 (0.85-1.00)	0.97 (0.92-1.02)	0.95 (0.91-1.00)	0.034	T-T/G-C	0.96	Same
							rs2019262	IL23R	1	67679990	G/A	0.92 (0.85-0.99)	0.97 (0.92-1.02)	0.95 (0.91-1.00)	0.037	T-G/G-A	1	Same
		rs9868809	CELSR3	3p21.31	48681053	C/T	rs34638686	CELSR3	3	48682658	C/T	0.97 (0.85-1.11)	0.88 (0.80-0.96)	0.91 (0.84-0.97)	0.0081	C-C/T-T	0.95	Opposite
							rs2310997	CELSR3	3	48678011	G/C	0.97 (0.85-1.11)	0.89 (0.82-0.97)	0.91 (0.85-0.98)	0.013	C-G/T-C	0.97	Opposite
							rs13096357	CELSR3	3	48675856	C/A	0.96 (0.84-1.10)	0.89 (0.82-0.97)	0.91 (0.85-0.98)	0.013	C-C/T-A	0.97	Opposite
							rs7620853	SLC26A6	3	48666503	G/A	0.97 (0.85-1.11)	0.89 (0.82-0.97)	0.92 (0.85-0.98)	0.016	C-G/T-A	0.97	Opposite
							rs34096717	NCKIPSD	3	48719453	A/C	0.97 (0.86-1.11)	0.90 (0.83-0.98)	0.92 (0.86-0.99)	0.02	C-A/T-C	0.92	Opposite
		rs6499188	─	16q22.1	68674788	A/G	rs12447310	CDH3	16	68680280	C/G	1.12 (1.02-1.23)	1.04 (0.98-1.11)	1.07 (1.01-1.12)	0.012	A-C/G-G	0.97	Opposite
							rs2902324	CDH3	16	68675726	C/T	1.11 (1.02-1.22)	1.04 (0.98-1.10)	1.06 (1.01-1.11)	0.023	A-C/G-T	0.98	Opposite
							rs10153230	CDH3	16	68671741	C/G	1.12 (1.02-1.23)	1.04 (0.98-1.10)	1.06 (1.01-1.11)	0.023	A-C/G-G	0.99	Opposite
		rs254560	C5orf66	5q31.1	134443606	G/A	rs254559	C5orf66	5	134444982	C/A	1.05 (0.97-1.14)	1.05 (0.99-1.10)	1.05 (1.00-1.10)	0.036	G-C/A-A	0.99	Same
							rs254564	C5orf66	5	134439287	C/T	1.06 (0.98-1.15)	1.04 (0.99-1.10)	1.05 (1.00-1.10)	0.042	G-C/A-T	0.91	Same
							rs254570	C5orf66	5	134436352	G/A	1.07 (0.99-1.17)	1.03 (0.98-1.09)	1.05 (1.00-1.09)	0.046	G-G/A-A	0.84	Same
							rs254562	C5orf66	5	134441457	A/G	1.04 (0.96-1.13)	1.04 (0.99-1.10)	1.04 (1.00-1.09)	0.06	G-A/A-G	0.98	Same
		rs6088765	PROCR, MMP24-AS1	20q11.22	33799280	T/G	rs6120880	MMP24-AS1	20	33829406	C/G	0.95 (0.88-1.03)	0.93 (0.85-1.01)	0.94 (0.89-1.00)	0.048	─	─	─
		rs3766606	PARK7	1p36.23	8022197	G/T	rs35675666	PARK7	1	8021973	G/T	1.08 (0.97-1.20)	1.07 (1.00-1.15)	1.07 (1.01-1.14)	0.021	G-G/T-T	0.99	Opposite
							rs12740409	PARK7	1	8027830	A/C	1.09 (0.98-1.20)	1.06 (0.99-1.14)	1.07 (1.01-1.13)	0.024	G-A/T-C	0.99	Opposite
							rs34124834	PARK7	1	8028930	T/G	1.09 (0.98-1.20)	1.06 (0.99-1.14)	1.07 (1.01-1.13)	0.024	G-T/T-G	0.99	Opposite
							rs34157438	PARK7	1	8023586	C/T	1.08 (0.97-1.20)	1.06 (0.99-1.14)	1.07 (1.01-1.13)	0.028	G-C/T-T	0.99	Opposite
							rs7517357	PARK7	1	8025275	C/T	1.08 (0.97-1.20)	1.06 (0.99-1.14)	1.07 (1.01-1.13)	0.028	G-C/T-T	0.99	Opposite
		rs4656958	─	1q23.3	160856964	G/A	rs10797087	─	1	160877252	G/A	0.97 (0.89-1.05)	0.94 (0.89-0.99)	0.95 (0.90-0.99)	0.02	G-G/A-A	0.87	Same
							rs1930596	─	1	160876052	G/A	0.96 (0.88-1.05)	0.94 (0.89-0.99)	0.95 (0.90-0.99)	0.021	G-G/A-A	0.87	Same
							rs10908811	─	1	160878485	G/A	0.96 (0.88-1.05)	0.94 (0.89-0.99)	0.95 (0.90-0.99)	0.023	G-G/A-A	0.86	Same
							rs2225591	─	1	160875756	T/C	0.96 (0.88-1.05)	0.94 (0.89-1.00)	0.95 (0.91-0.99)	0.023	G-T/A-C	0.87	Same
							rs1810924	─	1	160880510	A/G	0.97 (0.89-1.05)	0.94 (0.89-0.99)	0.95 (0.91-0.99)	0.023	G-A/A-G	0.86	Same
		rs10781499	CARD9	9q34.3	139266405	G/A	rs10781507	SNAPC4	9	139272058	A/G	1.02 (0.94-1.11)	1.06 (1.00-1.11)	1.05 (1.00-1.09)	0.043	G-A/A-G	0.97	Same
							rs4266763	SNAPC4	9	139289825	A/G	1.01 (0.93-1.10)	1.06 (1.01-1.12)	1.05 (1.00-1.09)	0.049	G-A/A-G	0.96	Same
							rs10781496	CARD9	9	139261086	A/G	1.03 (0.95-1.12)	1.05 (1.00-1.11)	1.05 (1.00-1.09)	0.049	G-A/A-G	0.88	Same
							rs10781505	SNAPC4	9	139271355	T/C	1.01 (0.93-1.10)	1.06 (1.00-1.11)	1.04 (1.00-1.09)	0.05	G-T/A-C	0.86	Same
							rs35670379	SNAPC4	9	139270606	T/C	1.01 (0.93-1.10)	1.06 (1.00-1.11)	1.04 (1.00-1.09)	0.051	G-T/A-C	0.85	Same
		rs267939	DAP	5p15.2	10752315	T/C	rs10866479	─	5	10674139	A/G	1.04 (0.95-1.13)	1.04 (0.99-1.10)	1.04 (1.00-1.09)	0.072	T-A/C-G	0.83	Same
							rs2918392	DAP	5	10704797	T/C	1.02 (0.94-1.11)	1.05 (1.00-1.11)	1.04 (1.00-1.09)	0.071	T-T/C-C	0.95	Same
							rs9637829	─	5	10673287	A/G	1.04 (0.95-1.13)	1.04 (0.99-1.10)	1.04 (1.00-1.09)	0.077	T-A/C-G	0.83	Same
							rs2930048	DAP	5	10698569	C/G	1.03 (0.95-1.12)	1.04 (0.99-1.10)	1.04 (0.99-1.09)	0.084	T-T/C-G	0.9	Same
		rs7805114	─	7q31.1	107450033	T/G	rs6466189	─	7	107448516	C/T	0.95 (0.87-1.02)	0.96 (0.91-1.01)	0.96 (0.91-1.00)	0.039	T-C/G-T	0.85	Same
							rs4730262	SLC26A3	7	107437614	C/G	0.94 (0.86-1.01)	0.96 (0.92-1.02)	0.96 (0.92-1.00)	0.043	T-C/G-G	0.78	Same
							rs2237681	SLC26A3	7	107441678	A/T	0.94 (0.86-1.02)	0.96 (0.91-1.02)	0.96 (0.91-1.00)	0.046	T-A/G-T	0.91	Same
		rs9268877	─	6p21.32	32431147	G/A	rs7773182	─	6	32441422	C/T	0.99 (0.91-1.07)	0.95 (0.90-1.00)	0.96 (0.92-1.00)	0.066	G-C/A-T	0.96	Opposite
							rs7739203	─	6	32441555	G/A	0.97 (0.89-1.05)	0.96 (0.91-1.01)	0.96 (0.92-1.00)	0.069	G-G/A-A	0.95	Opposite
							rs9269069	HLA-DRB9	6	32440362	T/C	0.99 (0.91-1.07)	0.95 (0.90-1.00)	0.96 (0.92-1.00)	0.071	G-T/A-C	0.89	Opposite
							rs9269071	HLA-DRB9	6	32440467	C/T	0.98 (0.90-1.06)	0.95 (0.90-1.00)	0.96 (0.92-1.00)	0.074	G-C/A-T	0.92	Opposite
							rs9269070	HLA-DRB9	6	32440451	A/G	0.97 (0.90-1.06)	0.96 (0.91-1.01)	0.96 (0.92-1.01)	0.082	G-A/A-G	0.92	Opposite
		rs2858829	─	6q22.1	116768917	A/G	rs2637678	─	6	116787378	T/C	0.95 (0.88-1.04)	0.97 (0.92-1.02)	0.97 (0.92-1.01)	0.13	A-T/G-C	0.89	─
		rs7404095	PRKCB	16p12.2	23864590	C/T	rs7199385	PRKCB	16	23850639	A/G	0.98 (0.91-1.06)	1.06 (1.01-1.12)	1.04 (0.99-1.08)	0.11	C-A/T-G	0.85	Opposite
							rs3900008	─	16	23847013	T/C	0.98 (0.91-1.06)	1.06 (1.01-1.12)	1.04 (0.99-1.08)	0.11	C-T/T-C	0.83	Opposite
							rs7200798	PRKCB	16	23853860	A/G	0.99 (0.91-1.07)	1.06 (1.00-1.11)	1.04 (0.99-1.08)	0.11	C-A/T-G	0.89	Opposite
							rs11860759	PRKCB	16	23856804	G/A	0.98 (0.90-1.06)	1.06 (1.00-1.11)	1.03 (0.99-1.08)	0.15	C-G/T-A	0.96	Opposite
							rs28458436	PRKCB	16	23858759	G/A	0.99 (0.91-1.07)	1.05 (1.00-1.11)	1.03 (0.99-1.08)	0.16	C-G/T-A	0.93	Opposite
		rs6724516	─	2q37.3	241586810	A/G	rs1864867	─	2	241593031	C/T	1.09 (0.99-1.19)	1.02 (0.96-1.08)	1.04 (0.99-1.09)	0.14	A-C/G-T	0.96	Opposite
							rs13023028	─	2	241608453	G/A	1.09 (0.99-1.19)	1.02 (0.96-1.08)	1.04 (0.99-1.09)	0.15	A-G/G-A	0.9	Opposite
		rs886774	─	7q31.1	107495434	A/G	rs4518	DLD	7	107560191	T/C	1.09 (1.00-1.18)	1.03 (0.98-1.08)	1.05 (1.00-1.09)	0.046	A-T/G-C	0.8	Same
							rs1468433	─	7	107495331	A/G	1.09 (1.01-1.18)	1.02 (0.97-1.07)	1.04 (0.99-1.09)	0.084	A-A/G-G	1	Same
							rs2395932	─	7	107495145	T/C	1.09 (1.00-1.18)	1.02 (0.97-1.07)	1.04 (0.99-1.08)	0.1	A-T/G-C	1	Same
							rs7776797	─	7	107493598	C/T	1.09 (1.00-1.18)	1.02 (0.96-1.07)	1.04 (0.99-1.08)	0.11	A-C/G-T	0.98	Same
							rs10215427	─	7	107498242	G/A	1.08 (0.99-1.17)	1.02 (0.97-1.07)	1.04 (0.99-1.08)	0.12	A-G/G-A	0.93	Same
		rs1728785	ZFP90	16q22.1	68591230	C/A	rs4783649	─	16	68558467	G/A	1.11 (1.00-1.22)	1.04 (0.97-1.11)	1.06 (1.00-1.12)	0.043	C-G/A-A	0.85	Opposite
							rs4783650	─	16	68558528	T/C	1.10 (0.99-1.21)	1.04 (0.97-1.11)	1.06 (1.00-1.12)	0.047	C-T/A-C	0.82	Opposite
							rs12929568	ZFP90	16	68596689	G/A	1.09 (1.00-1.20)	1.03 (0.97-1.09)	1.05 (0.99-1.10)	0.078	C-G/A-A	0.91	Opposite
							rs11648314	ZFP90	16	68596775	C/T	1.09 (0.99-1.20)	1.03 (0.97-1.10)	1.05 (0.99-1.10)	0.078	C-C/A-T	0.98	Opposite
							rs698729	─	16	68624205	C/G	1.10 (1.00-1.21)	1.02 (0.96-1.09)	1.05 (0.99-1.10)	0.091	C-C/A-G	0.89	Opposite
		rs7282490	─	21q22.3	45615741	A/G	rs3804032	─	21	45629691	G/A	1.06 (0.97-1.15)	1.03 (0.98-1.08)	1.04 (0.99-1.08)	0.11	A-G/G-A	0.86	Same
							rs2838519	─	21	45615023	A/G	1.06 (0.97-1.15)	1.03 (0.97-1.08)	1.04 (0.99-1.08)	0.13	A-A/G-G	0.98	Same
							rs8126495	─	21	45624136	T/C	1.06 (0.98-1.15)	1.01 (0.96-1.07)	1.02 (0.98-1.07)	0.28	A-T/G-C	0.86	Same
		rs734999	LOC100996583	1p36.32	2513216	T/C	rs2495366	TNFRSF14	1	2488930	G/A	1.09 (1.01-1.19)	1.02 (0.97-1.07)	1.04 (1.00-1.09)	0.065	T-A/C-G	0.91	Opposite
							rs2281852	TNFRSF14	1	2490942	C/A	1.09 (1.01-1.18)	1.02 (0.97-1.07)	1.04 (1.00-1.09)	0.079	T-A/C-C	0.93	Opposite
							rs2227312	RP3-395M20.8	1	2487663	C/A	1.09 (1.00-1.18)	1.02 (0.97-1.07)	1.04 (0.99-1.08)	0.087	T-A/C-C	0.94	Opposite
							rs2257763	TNFRSF14	1	2490898	C/A	1.09 (1.01-1.18)	1.02 (0.97-1.07)	1.04 (0.99-1.08)	0.088	T-A/C-C	0.92	Opposite
							rs4870	RP3-395M20.8	1	2488153	A/G	1.09 (1.00-1.18)	1.02 (0.97-1.07)	1.04 (0.99-1.08)	0.091	T-G/C-A	0.94	Opposite
		rs4380874	─	7q31.1	107480315	C/T	rs886774	─	7	107495434	A/G	1.09 (1.01-1.19)	1.02 (0.97-1.08)	1.04 (1.00-1.09)	0.078	C-A/T-G	0.85	Same
							rs1468433	─	7	107495331	A/G	1.09 (1.01-1.18)	1.02 (0.97-1.07)	1.04 (0.99-1.09)	0.084	C-A/T-G	0.85	Same
							rs2395932	─	7	107495145	T/C	1.09 (1.00-1.18)	1.02 (0.97-1.07)	1.04 (0.99-1.08)	0.1	C-T/T-C	0.85	Same
							rs7776797	─	7	107493598	C/T	1.09 (1.00-1.18)	1.02 (0.96-1.07)	1.04 (0.99-1.08)	0.11	C-C/T-T	0.86	Same
							rs10215427	─	7	107498242	G/A	1.08 (0.99-1.17)	1.02 (0.97-1.07)	1.04 (0.99-1.08)	0.12	C-G/T-A	0.8	Same
		rs3024493	IL10	1q32.1	206943968	C/A	rs3024505	─	1	206939904	G/A	1.10 (0.98-1.22)	1.02 (0.95-1.10)	1.05 (0.99-1.11)	0.14	C-G/A-A	0.99	Same
							rs3024495	IL10	1	206942413	C/T	1.09 (0.98-1.22)	1.03 (0.96-1.10)	1.05 (0.99-1.11)	0.14	C-C/A-T	0.99	Same
							rs3122605	─	1	206955041	A/G	1.09 (0.97-1.23)	1.01 (0.94-1.09)	1.04 (0.97-1.11)	0.25	C-A/A-G	0.84	Same
		rs483905	MAML2	11q21	96023427	G/A	rs474137	MAML2	11	96045998	T/C	1.03 (0.94-1.12)	1.05 (0.99-1.11)	1.04 (0.99-1.09)	0.08	G-T/A-C	0.89	Same
							rs147075562	MAML2	11	96015429	T/A	1.04 (0.95-1.14)	1.04 (0.98-1.10)	1.04 (0.99-1.09)	0.13	G-T/A-A	0.84	Same
							rs1786707	MAML2	11	96031872	T/A	1.01 (0.92-1.10)	1.05 (0.99-1.11)	1.03 (0.99-1.09)	0.16	G-T/A-A	0.97	Same
		rs12942547	STAT3	17q21.2	40527544	A/G	rs9897389	STAT3	17	40523725	T/C	0.97 (0.90-1.06)	0.97 (0.92-1.02)	0.97 (0.93-1.01)	0.19	A-T/G-C	1	Same
							rs12949918	STAT3	17	40526273	T/C	0.97 (0.90-1.06)	0.97 (0.92-1.02)	0.97 (0.93-1.02)	0.22	A-T/G-C	0.98	Same
							rs9891119	STAT3	17	40507980	A/C	0.97 (0.89-1.06)	0.97 (0.92-1.03)	0.97 (0.93-1.02)	0.23	A-A/G-C	0.81	Same
							rs3816769	STAT3	17	40498273	T/C	0.97 (0.89-1.05)	0.98 (0.93-1.03)	0.97 (0.93-1.02)	0.24	A-T/G-C	0.8	Same
		rs1297265	LOC101927745	21q21.1	16817051	A/G	rs1736034	─	21	16823258	T/A	0.96 (0.88-1.04)	0.97 (0.92-1.02)	0.96 (0.92-1.01)	0.11	A-T/G-A	1	Same
							rs1736157	─	21	16828235	G/C	0.96 (0.88-1.04)	0.97 (0.92-1.02)	0.97 (0.92-1.01)	0.11	A-G/G-C	0.99	Same
							rs1736015	─	21	16806316	C/A	0.97 (0.89-1.05)	0.97 (0.92-1.02)	0.97 (0.93-1.01)	0.19	A-C/G-A	0.89	Same
							rs2823289	─	21	16841195	T/C	0.96 (0.88-1.04)	0.98 (0.93-1.04)	0.98 (0.93-1.02)	0.28	A-T/G-C	0.82	Same
							rs1297255	─	21	16804367	C/T	0.97 (0.90-1.06)	0.98 (0.93-1.03)	0.98 (0.93-1.02)	0.28	A-C/G-T	0.88	Same
	Crohn's disease	rs9858542	BSN	3p21.31	49701983	G/A	rs9836291	BSN	3	49697459	G/A	0.98 (0.90-1.07)	0.90 (0.85-0.96)	0.93 (0.88-0.97)	0.0012	G-G/A-A	1	Opposite
							rs7614725	BSN	3	49650395	G/A	0.97 (0.89-1.05)	0.91 (0.86-0.96)	0.93 (0.88-0.97)	0.0013	G-G/A-A	0.97	Opposite
							rs11917431	BSN	3	49644012	C/T	0.97 (0.89-1.05)	0.91 (0.86-0.96)	0.93 (0.88-0.97)	0.0013	G-C/A-T	0.97	Opposite
							rs7630869	DAG1	3	49522543	C/T	0.97 (0.89-1.05)	0.91 (0.86-0.97)	0.93 (0.89-0.97)	0.0017	G-C/A-T	0.93	Opposite
							rs13062429	DAG1	3	49559485	G/A	0.96 (0.89-1.05)	0.91 (0.87-0.97)	0.93 (0.89-0.97)	0.0018	G-G/A-A	0.93	Opposite
		rs6651252	LINC00824	8q24.21	129567181	T/C	rs74866331	LINC00824	8	129548654	T/C	0.93 (0.81-1.06)	0.89 (0.82-0.97)	0.90 (0.84-0.97)	0.0049	T-T/C-C	0.83	Same
							rs10102835	LINC00824	8	129560314	C/T	0.93 (0.82-1.06)	0.90 (0.83-0.98)	0.91 (0.85-0.97)	0.0066	T-C/C-T	0.84	Same
							rs10088755	LINC00824	8	129551633	G/A	0.96 (0.85-1.08)	0.90 (0.83-0.97)	0.92 (0.86-0.98)	0.0075	T-G/C-A	0.99	Same
							rs16903065	LINC00824	8	129540464	C/A	0.96 (0.85-1.08)	0.90 (0.83-0.97)	0.92 (0.86-0.98)	0.0081	T-C/C-A	0.99	Same
							rs17807628	LINC00824	8	129551311	T/C	0.96 (0.85-1.08)	0.90 (0.83-0.97)	0.92 (0.86-0.98)	0.0092	T-T/C-C	0.99	Same
		rs2872507	─	17q21.1	38040763	G/A	rs12936231	ZPBP2	17	38029120	C/G	0.93 (0.85-1.00)	0.93 (0.89-0.98)	0.93 (0.89-0.97)	0.0012	G-C/A-G	0.84	Opposite
							rs1453559	IKZF3	17	38020419	C/T	1.06 (0.98-1.15)	1.07 (1.02-1.13)	1.07 (1.03-1.12)	0.0017	G-T/A-C	0.83	Opposite
							rs11658278	ZPBP2	17	38031164	T/C	0.93 (0.86-1.01)	0.94 (0.89-0.98)	0.93 (0.89-0.97)	0.0017	G-T/A-C	0.87	Opposite
							rs9903250	ZPBP2	17	38031030	G/A	0.93 (0.86-1.01)	0.94 (0.89-0.98)	0.93 (0.89-0.97)	0.0018	G-G/A-A	0.87	Opposite
							rs12950209	─	17	38049102	T/C	0.93 (0.86-1.00)	0.94 (0.89-0.99)	0.93 (0.90-0.98)	0.002	G-T/A-C	0.87	Opposite
		rs568617	FIBP	11q13.1	65653242	C/T	rs58568715	FOSL1	11	65662985	A/G	1.07 (0.96-1.19)	1.09 (1.02-1.17)	1.09 (1.02-1.15)	0.0053	C-A/T-G	0.81	Same
							rs2231884	─	11	65656564	C/T	1.07 (0.97-1.20)	1.09 (1.02-1.17)	1.08 (1.02-1.15)	0.0058	C-C/T-T	0.83	Same
							rs10791830	FOSL1	11	65661291	C/T	1.04 (0.94-1.15)	1.09 (1.02-1.16)	1.07 (1.02-1.13)	0.012	C-C/T-T	0.95	Same
							rs608616	FOSL1	11	65662436	T/C	1.02 (0.92-1.14)	1.07 (1.00-1.15)	1.06 (1.00-1.12)	0.048	C-T/T-C	0.89	Same
		rs10883365	LINC01475	10q24.2	101287764	A/G	rs10883361	─	10	101282968	C/T	1.02 (0.94-1.10)	1.09 (1.04-1.15)	1.07 (1.03-1.12)	0.002	A-C/G-T	0.91	Same
							rs7911680	NKX2-3	10	101293468	C/A	1.01 (0.94-1.10)	1.09 (1.04-1.15)	1.07 (1.02-1.12)	0.0022	A-C/G-A	0.97	Same
							rs10748782	─	10	101283389	G/T	1.02 (0.94-1.10)	1.09 (1.04-1.15)	1.07 (1.02-1.12)	0.0022	A-G/G-T	0.9	Same
							rs10883373	─	10	101292484	A/G	1.01 (0.94-1.10)	1.09 (1.04-1.15)	1.07 (1.02-1.11)	0.0024	A-A/G-G	0.98	Same
							rs10786556	─	10	101278324	T/C	1.00 (0.93-1.09)	1.10 (1.04-1.15)	1.07 (1.02-1.12)	0.0024	A-T/G-C	0.91	Same
		rs9988642	IL23R	1p31.3	67726104	T/C	rs148170789	IL23R	1	67710231	A/G	1.01 (0.86-1.18)	0.85 (0.77-0.94)	0.89 (0.82-0.97)	0.0087	T-A/C-G	0.94	Same
		rs13428812	DNMT3A	2p23.3	25492467	A/G	rs72810068	DNMT3A	2	25505793	T/C	─	1.10 (1.03-1.18)	1.10 (1.03-1.18)	0.0066	A-T/G-C	0.94	Same
							rs2006788	DNMT3A	2	25502552	T/G	─	1.10 (1.02-1.18)	1.10 (1.02-1.18)	0.009	A-T/G-G	0.96	Same
							rs56197924	DNMT3A	2	25503786	G/A	─	1.10 (1.02-1.18)	1.10 (1.02-1.18)	0.0092	A-G/G-A	0.97	Same
							rs57976122	DNMT3A	2	25506107	C/T	─	1.10 (1.02-1.18)	1.10 (1.02-1.18)	0.0094	A-C/G-T	0.96	Same
							rs56089703	DNMT3A	2	25500289	T/A	─	1.09 (1.02-1.17)	1.09 (1.02-1.17)	0.011	A-T/G-A	0.97	Same
		rs359457	─	5q35.2	173279842	T/C	rs359431	─	5	173288534	T/C	1.01 (0.93-1.10)	1.08 (1.02-1.13)	1.06 (1.01-1.10)	0.013	T-T/C-C	0.98	Opposite
							rs359456	─	5	173279808	C/T	1.00 (0.93-1.09)	1.08 (1.02-1.14)	1.06 (1.01-1.10)	0.015	T-C/C-T	1	Opposite
		rs12946510	─	17q12	37912377	C/T	rs9747973	─	17	37905107	C/T	1.06 (0.98-1.14)	1.07 (1.02-1.13)	1.07 (1.02-1.12)	0.0024	C-T/T-C	0.83	Opposite
							rs907091	IKZF3	17	37921742	T/C	0.95 (0.88-1.03)	0.94 (0.89-0.98)	0.94 (0.90-0.98)	0.0043	C-T/T-C	0.8	Opposite
							rs4795397	─	17	38023745	A/G	0.93 (0.86-1.01)	0.95 (0.90-1.00)	0.94 (0.90-0.98)	0.0076	C-A/T-G	0.87	Opposite
							rs9905959	ZPBP2	17	38031138	A/G	0.94 (0.86-1.01)	0.95 (0.90-1.00)	0.95 (0.91-0.99)	0.011	C-A/T-G	0.85	Opposite
							rs59716545	ZPBP2	17	38031857	T/G	0.93 (0.86-1.01)	0.95 (0.91-1.00)	0.95 (0.91-0.99)	0.013	C-T/T-G	0.85	Opposite
		rs9491697	RSPO3	6q22.33	127456122	A/G	rs9482772	RSPO3	6	127446790	T/C	1.06 (0.97-1.14)	1.06 (1.01-1.12)	1.06 (1.02-1.11)	0.0074	A-T/G-C	0.96	Same
		rs2413583	─	22q13.1	39659773	C/T	rs9611131	─	22	39662480	T/C	1.12 (1.00-1.25)	1.06 (0.99-1.14)	1.07 (1.01-1.14)	0.018	C-T/T-C	0.81	Opposite
							rs9607629	─	22	39670854	A/G	1.06 (0.95-1.18)	1.07 (1.00-1.14)	1.07 (1.01-1.13)	0.027	C-A/T-G	0.87	Opposite
		rs7517847	IL23R	1p31.3	67681669	T/G	rs11580078	IL23R	1	67669634	C/G	0.91 (0.84-0.99)	0.96 (0.91-1.01)	0.95 (0.91-0.99)	0.017	T-C/G-G	0.92	Same
							rs11576518	IL23R	1	67682196	G/A	0.92 (0.85-1.00)	0.97 (0.92-1.02)	0.95 (0.91-1.00)	0.033	T-G/G-A	1	Same
							rs2863210	IL23R	1	67670768	T/C	0.92 (0.85-1.00)	0.97 (0.92-1.02)	0.95 (0.91-1.00)	0.034	T-T/G-C	0.96	Same
							rs2019262	IL23R	1	67679990	G/A	0.92 (0.85-0.99)	0.97 (0.92-1.02)	0.95 (0.91-1.00)	0.037	T-G/G-A	1	Same
		rs727563	ACO2	22q13.2	41867377	T/C	C22P41962470	CSDC2	22	41962470	A/C	1.12 (1.01-1.24)	1.05 (0.94-1.18)	1.09 (1.01-1.17)	0.03	─	─	─
							rs113546599	LOC105373044	22	41950482	G/C	1.08 (0.98-1.20)	1.04 (0.98-1.11)	1.06 (1.00-1.11)	0.051	─	─	─
		rs9868809	CELSR3	3p21.31	48681053	C/T	rs34638686	CELSR3	3	48682658	C/T	0.97 (0.85-1.11)	0.88 (0.80-0.96)	0.91 (0.84-0.97)	0.0081	C-C/T-T	0.95	Opposite
							rs2310997	CELSR3	3	48678011	G/C	0.97 (0.85-1.11)	0.89 (0.82-0.97)	0.91 (0.85-0.98)	0.013	C-G/T-C	0.97	Opposite
							rs13096357	CELSR3	3	48675856	C/A	0.96 (0.84-1.10)	0.89 (0.82-0.97)	0.91 (0.85-0.98)	0.013	C-C/T-A	0.97	Opposite
							rs7620853	SLC26A6	3	48666503	G/A	0.97 (0.85-1.11)	0.89 (0.82-0.97)	0.92 (0.85-0.98)	0.016	C-G/T-A	0.97	Opposite
							rs34096717	NCKIPSD	3	48719453	A/C	0.97 (0.86-1.11)	0.90 (0.83-0.98)	0.92 (0.86-0.99)	0.02	C-A/T-C	0.92	Opposite
		rs10061469	─	5q13.2	72518148	T/C	rs13160915	RP11-60A8.1	5	72525986	G/A	0.98 (0.90-1.07)	0.93 (0.88-0.99)	0.95 (0.90-0.99)	0.021	T-G/C-A	1	Same
							rs7730504	RP11-60A8.1	5	72519678	A/G	0.98 (0.90-1.07)	0.93 (0.88-0.99)	0.95 (0.90-0.99)	0.021	T-A/C-G	1	Same
							rs6882248	RP11-60A8.1	5	72521854	C/T	0.98 (0.90-1.07)	0.93 (0.88-0.99)	0.95 (0.90-0.99)	0.021	T-C/C-T	1	Same
							rs11953937	RP11-60A8.1	5	72520347	A/T	0.98 (0.90-1.07)	0.93 (0.88-0.99)	0.95 (0.90-0.99)	0.022	─	─	─
							rs62361398	RP11-60A8.1	5	72529325	C/T	0.98 (0.90-1.07)	0.94 (0.89-0.99)	0.95 (0.90-0.99)	0.025	T-C/C-T	0.99	Same
		rs2488389	DENND1B	1q31.3	197631141	G/A	rs11583319	DENND1B	1	197555860	A/G	0.92 (0.84-1.01)	0.94 (0.88-1.00)	0.93 (0.89-0.98)	0.0075	G-A/A-G	0.91	Opposite
							rs35939830	DENND1B	1	197561510	C/T	0.92 (0.84-1.02)	0.94 (0.89-1.00)	0.94 (0.89-0.98)	0.011	G-C/A-T	0.9	Opposite
							rs6702421	DENND1B	1	197559324	C/T	0.92 (0.84-1.02)	0.94 (0.89-1.00)	0.94 (0.89-0.99)	0.012	G-C/A-T	0.89	Opposite
							rs12118913	DENND1B	1	197512404	T/C	0.93 (0.85-1.03)	0.94 (0.88-1.00)	0.94 (0.89-0.99)	0.014	G-T/A-C	0.89	Opposite
							rs2042097	─	1	197471350	G/A	0.94 (0.85-1.03)	0.94 (0.89-1.00)	0.94 (0.89-0.99)	0.017	G-G/A-A	0.88	Opposite
		rs3897478	─	1p12	120451190	T/C	rs12084158	NOTCH2	1	120608444	A/G	1.08 (0.94-1.24)	1.10 (1.01-1.20)	1.09 (1.02-1.18)	0.016	T-A/C-G	0.96	Opposite
							rs2487569	─	1	120442257	A/T	1.05 (0.93-1.20)	1.09 (1.00-1.18)	1.08 (1.01-1.15)	0.028	T-A/C-T	0.88	Opposite
							rs41463147	NOTCH2	1	120554134	T/G	1.11 (0.96-1.27)	1.08 (0.99-1.18)	1.09 (1.01-1.17)	0.033	T-T/C-G	0.87	Opposite
							rs406767	NOTCH2	1	120554048	T/C	1.09 (0.95-1.25)	1.08 (0.99-1.18)	1.08 (1.01-1.16)	0.035	T-T/C-C	0.92	Opposite
							rs141884455	NOTCH2	1	120544331	A/G	1.07 (0.94-1.23)	1.08 (0.99-1.17)	1.08 (1.00-1.16)	0.036	T-A/C-G	0.9	Opposite
		rs3766606	PARK7	1p36.23	8022197	G/T	rs35675666	PARK7	1	8021973	G/T	1.08 (0.97-1.20)	1.07 (1.00-1.15)	1.07 (1.01-1.14)	0.021	G-G/T-T	0.99	Opposite
							rs12740409	PARK7	1	8027830	A/C	1.09 (0.98-1.20)	1.06 (0.99-1.14)	1.07 (1.01-1.13)	0.024	G-A/T-C	0.99	Opposite
							rs34124834	PARK7	1	8028930	T/G	1.09 (0.98-1.20)	1.06 (0.99-1.14)	1.07 (1.01-1.13)	0.024	G-T/T-G	0.99	Opposite
							rs34157438	PARK7	1	8023586	C/T	1.08 (0.97-1.20)	1.06 (0.99-1.14)	1.07 (1.01-1.13)	0.028	G-C/T-T	0.99	Opposite
							rs7517357	PARK7	1	8025275	C/T	1.08 (0.97-1.20)	1.06 (0.99-1.14)	1.07 (1.01-1.13)	0.028	G-C/T-T	0.99	Opposite
		rs1250546	ZMIZ1	10q22.3	81032532	A/G	rs2802372	ZMIZ1	10	81047575	A/C	1.06 (0.98-1.15)	1.04 (0.99-1.10)	1.05 (1.00-1.10)	0.032	A-A/G-C	0.82	Opposite
							rs1250568	ZMIZ1	10	81045280	T/C	1.06 (0.98-1.15)	1.04 (0.99-1.10)	1.05 (1.00-1.09)	0.047	A-T/G-C	0.82	Opposite
							rs1108618	ZMIZ1	10	81043743	A/G	1.05 (0.97-1.14)	1.04 (0.98-1.09)	1.04 (1.00-1.09)	0.078	A-A/G-G	0.87	Opposite
							rs1108617	ZMIZ1	10	81043573	A/G	1.04 (0.96-1.13)	1.04 (0.98-1.09)	1.04 (0.99-1.09)	0.097	A-A/G-G	0.83	Opposite
							rs1250540	ZMIZ1	10	81036007	A/G	1.04 (0.96-1.13)	1.03 (0.97-1.09)	1.03 (0.99-1.08)	0.16	A-A/G-G	0.83	Opposite
		rs2361755	─	16q24.1	86009686	G/C	rs2885363	─	16	86009261	G/C	0.97 (0.83-1.12)	1.14 (1.03-1.25)	1.08 (1.00-1.17)	0.063	G-G/C-C	1	Opposite
		rs1199103	─	10q21.1	59947231	A/G	rs2246537	─	10	59929697	T/G	0.94 (0.86-1.04)	0.95 (0.89-1.01)	0.95 (0.90-1.00)	0.054	─	─	─
							rs2790186	CISD1	10	60041914	G/T	0.94 (0.86-1.04)	0.92 (0.83-1.02)	0.93 (0.87 -1.00)	0.062	─	─	─
							rs9731951	─	10	59923346	A/G	0.95 (0.86-1.05)	0.95 (0.89-1.02)	0.95 (0.90 -1.01)	0.083	A-A/G-G	0.79	Same
							rs4405261	IPMK	10	59965514	G/A	0.95 (0.86-1.05)	0.96 (0.90-1.03)	0.96 (0.91 -1.01)	0.15	A-G/G-A	0.88	Same
		rs6708413	IL18RAP	2q12.1	103063369	A/G	rs2075185	─	2	103070988	G/A	1.07 (0.97-1.17)	1.04 (0.98-1.10)	1.05 (1.00-1.10)	0.071	─	─	─
		rs10495903	THADA	2p21	43806918	C/T	rs80075345	THADA	2	43810698	C/T	1.14 (1.02-1.28)	1.06 (0.98-1.14)	1.08 (1.02-1.15)	0.015	C-C/T-T	0.98	Same
							rs74501107	THADA	2	43806012	A/C	1.14 (1.02-1.28)	1.05 (0.98-1.13)	1.08 (1.01-1.15)	0.017	─	─	─
							rs76621120	THADA	2	43810651	G/A	1.14 (1.02-1.28)	1.05 (0.98-1.13)	1.08 (1.01-1.15)	0.019	C-G/T-A	0.99	Same
							rs79388962	THADA	2	43807561	T/C	1.15 (1.02-1.29)	1.05 (0.97-1.13)	1.08 (1.01-1.15)	0.02	C-T/T-C	0.97	Same
							rs76501189	THADA	2	43806353	C/T	1.14 (1.01-1.27)	1.05 (0.98-1.13)	1.08 (1.01-1.15)	0.021	C-C/T-T	0.99	Same
		rs4077515	CARD9	9q34.3	139266496	C/T	rs10781507	SNAPC4	9	139272058	A/G	1.02 (0.94-1.11)	1.06 (1.00-1.11)	1.05 (1.00-1.09)	0.043	C-A/T-G	0.97	Same
							rs4266763	SNAPC4	9	139289825	A/G	1.01 (0.93-1.10)	1.06 (1.01-1.12)	1.05 (1.00-1.09)	0.049	C-A/T-G	0.97	Same
							rs10781496	CARD9	9	139261086	A/G	1.03 (0.95-1.12)	1.05 (1.00-1.11)	1.05 (1.00-1.09)	0.049	C-A/T-G	0.89	Same
							rs10781505	SNAPC4	9	139271355	T/C	1.01 (0.93-1.10)	1.06 (1.00-1.11)	1.04 (1.00-1.09)	0.05	C-T/T-C	0.87	Same
							rs35670379	SNAPC4	9	139270606	T/C	1.01 (0.93-1.10)	1.06 (1.00-1.11)	1.04 (1.00-1.09)	0.051	C-T/T-C	0.86	Same
		rs72810983	CPEB4	5q35.2	173318254	A/G	rs7731717	─	5	173281685	T/C	1.01 (0.92-1.10)	1.07 (1.01-1.13)	1.05 (1.00-1.10)	0.032	A-T/G-C	0.79	Opposite
		rs2930047	DAP	5p15.2	10695526	T/C	rs10866479	─	5	10674139	A/G	1.04 (0.95-1.13)	1.04 (0.99-1.10)	1.04 (1.00-1.09)	0.072	T-A/C-G	0.9	Same
							rs2918392	DAP	5	10704797	T/C	1.02 (0.94-1.11)	1.05 (1.00-1.11)	1.04 (1.00-1.09)	0.071	T-T/C-C	0.94	Same
							rs9637829	─	5	10673287	A/G	1.04 (0.95-1.13)	1.04 (0.99-1.10)	1.04 (1.00-1.09)	0.077	T-A/C-G	0.9	Same
							rs2930048	DAP	5	10698569	C/G	1.03 (0.95-1.12)	1.04 (0.99-1.10)	1.04 (0.99-1.09)	0.084	T-C/C-G	0.99	Same
							rs3822411	DAP	5	10684942	T/C	1.03 (0.94-1.12)	1.03 (0.98-1.09)	1.03 (0.98-1.08)	0.21	T-T/C-C	0.81	Same
		rs11209003	C1orf141	1p31.3	67601132	G/T	rs10789224	C1orf141	1	67605134	T/C	0.88 (0.80-0.96)	0.98 (0.93-1.04)	0.95 (0.91-1.00)	0.04	G-T/T-C	0.95	Same
							rs72676067	C1orf141	1	67658803	G/A	0.88 (0.80-0.95)	0.99 (0.94-1.05)	0.96 (0.91-1.00)	0.059	G-G/T-A	0.93	Same
							rs12095335	C1orf141	1	67649700	C/T	0.88 (0.80-0.96)	0.99 (0.94-1.05)	0.96 (0.91-1.00)	0.062	G-C/T-T	0.93	Same
							rs56920441	C1orf141	1	67652012	A/G	0.88 (0.81-0.96)	0.99 (0.94-1.05)	0.96 (0.91-1.00)	0.064	G-A/T-G	0.92	Same
							rs10889660	C1orf141	1	67623874	G/A	0.88 (0.81-0.96)	0.99 (0.94-1.05)	0.96 (0.91-1.00)	0.066	G-G/T-A	0.95	Same
		rs3853824	C17orf67	17q22	54880993	C/T	rs6503767	C17orf67	17	54900047	T/C	1.10 (1.02-1.20)	1.01 (0.96-1.07)	1.04 (0.99-1.09)	0.088	C-T/T-C	0.91	Opposite
							rs2235092	C17orf67	17	54911929	A/G	1.10 (1.01-1.20)	1.01 (0.96-1.07)	1.04 (0.99-1.09)	0.095	C-A/T-G	0.84	Opposite
							rs3986358	C17orf67	17	54898301	C/T	1.10 (1.01-1.20)	1.01 (0.96-1.07)	1.04 (0.99-1.08)	0.12	C-C/T-T	1	Opposite
							rs7209599	─	17	54868990	T/C	1.10 (1.01-1.19)	1.00 (0.95-1.06)	1.03 (0.98-1.08)	0.21	C-T/T-C	0.99	Opposite
	Inflammatory bowel disease	rs9858542	BSN	3p21.31	49701983	G/A	rs9836291	BSN	3	49697459	G/A	0.98 (0.90-1.07)	0.90 (0.85-0.96)	0.93 (0.88-0.97)	0.0012	G-G/A-A	1	Opposite
							rs7614725	BSN	3	49650395	G/A	0.97 (0.89-1.05)	0.91 (0.86-0.96)	0.93 (0.88-0.97)	0.0013	G-G/A-A	0.97	Opposite
							rs11917431	BSN	3	49644012	C/T	0.97 (0.89-1.05)	0.91 (0.86-0.96)	0.93 (0.88-0.97)	0.0013	G-C/A-T	0.97	Opposite
							rs7630869	DAG1	3	49522543	C/T	0.97 (0.89-1.05)	0.91 (0.86-0.97)	0.93 (0.89-0.97)	0.0017	G-C/A-T	0.93	Opposite
							rs13062429	DAG1	3	49559485	G/A	0.96 (0.89-1.05)	0.91 (0.87-0.97)	0.93 (0.89-0.97)	0.0018	G-G/A-A	0.93	Opposite
		rs6651252	LINC00824	8q24.21	129567181	T/C	rs74866331	LINC00824	8	129548654	T/C	0.93 (0.81-1.06)	0.89 (0.82-0.97)	0.90 (0.84-0.97)	0.0049	T-T/C-C	0.83	Same
							rs10102835	LINC00824	8	129560314	C/T	0.93 (0.82-1.06)	0.90 (0.83-0.98)	0.91 (0.85-0.97)	0.0066	T-C/C-T	0.84	Same
							rs10088755	LINC00824	8	129551633	G/A	0.96 (0.85-1.08)	0.90 (0.83-0.97)	0.92 (0.86-0.98)	0.0075	T-G/C-A	0.99	Same
							rs16903065	LINC00824	8	129540464	C/A	0.96 (0.85-1.08)	0.90 (0.83-0.97)	0.92 (0.86-0.98)	0.0081	T-C/C-A	0.99	Same
							rs17807628	LINC00824	8	129551311	T/C	0.96 (0.85-1.08)	0.90 (0.83-0.97)	0.92 (0.86-0.98)	0.0092	T-T/C-C	0.99	Same
		rs7809799	KPNA7	7q22.1	98760504	A/G	rs73147654	KPNA7	7	98783782	T/C	1.21 (0.99-1.48)	1.13 (1.00-1.29)	1.16 (1.04-1.28)	0.0079	A-T/G-C	0.95	Same
							rs4454228	─	7	98753158	C/T	1.21 (1.00-1.47)	1.12 (0.99-1.27)	1.15 (1.04-1.27)	0.0091	A-C/G-T	0.98	Same
							rs75599274	KPNA7	7	98781259	A/C	1.21 (0.99-1.47)	1.13 (0.99-1.28)	1.15 (1.03-1.28)	0.01	A-A/G-C	0.97	Same
		rs2872507	─	17q21.1	38040763	G/A	rs12936231	ZPBP2	17	38029120	C/G	0.93 (0.85-1.00)	0.93 (0.89-0.98)	0.93 (0.89-0.97)	0.0012	G-C/A-G	0.84	Opposite
							rs1453559	IKZF3	17	38020419	C/T	1.06 (0.98-1.15)	1.07 (1.02-1.13)	1.07 (1.03-1.12)	0.0017	G-T/A-C	0.83	Opposite
							rs11658278	ZPBP2	17	38031164	T/C	0.93 (0.86-1.01)	0.94 (0.89-0.98)	0.93 (0.89-0.97)	0.0017	G-T/A-C	0.87	Opposite
							rs9903250	ZPBP2	17	38031030	G/A	0.93 (0.86-1.01)	0.94 (0.89-0.98)	0.93 (0.89-0.97)	0.0018	G-G/A-A	0.87	Opposite
							rs12950209	─	17	38049102	T/C	0.93 (0.86-1.00)	0.94 (0.89-0.99)	0.93 (0.90-0.98)	0.002	G-T/A-C	0.87	Opposite
		rs10883365	LINC01475	10q24.2	101287764	A/G	rs10883361	─	10	101282968	C/T	1.02 (0.94-1.10)	1.09 (1.04-1.15)	1.07 (1.03-1.12)	0.002	A-C/G-T	0.91	Same
							rs7911680	NKX2-3	10	101293468	C/A	1.01 (0.94-1.10)	1.09 (1.04-1.15)	1.07 (1.02-1.12)	0.0022	A-C/G-A	0.97	Same
							rs10748782	─	10	101283389	G/T	1.02 (0.94-1.10)	1.09 (1.04-1.15)	1.07 (1.02-1.12)	0.0022	A-G/G-T	0.9	Same
							rs10883373	─	10	101292484	A/G	1.01 (0.94-1.10)	1.09 (1.04-1.15)	1.07 (1.02-1.11)	0.0024	A-A/G-G	0.98	Same
							rs10786556	─	10	101278324	T/C	1.00 (0.93-1.09)	1.10 (1.04-1.15)	1.07 (1.02-1.12)	0.0024	A-T/G-C	0.91	Same
		rs9988642	IL23R	1p31.3	67726104	T/C	rs148170789	IL23R	1	67710231	A/G	1.01 (0.86-1.18)	0.85 (0.77-0.94)	0.89 (0.82-0.97)	0.0087	T-A/C-G	0.94	Same
		rs4256018	FERMT1	20p12.3	6093889	T/G	rs11700048	FERMT1	20	6085006	T/C	0.96 (0.88-1.05)	0.92 (0.87-0.98)	0.93 (0.89-0.98)	0.0068	T-T/G-C	0.97	Opposite
							rs6053910	FERMT1	20	6087272	G/C	0.96 (0.88-1.05)	0.92 (0.87-0.98)	0.93 (0.89-0.98)	0.0069	T-G/G-C	0.97	Opposite
							rs3761878	FERMT1	20	6076126	A/T	0.97 (0.88-1.06)	0.93 (0.88-0.99)	0.94 (0.90-0.99)	0.015	T-A/G-T	0.89	Opposite
		rs13428812	DNMT3A	2p23.3	25492467	A/G	rs72810068	DNMT3A	2	25505793	T/C	─	1.10 (1.03-1.18)	1.10 (1.03-1.18)	0.0066	A-T/G-C	0.94	Same
							rs2006788	DNMT3A	2	25502552	T/G	─	1.10 (1.02-1.18)	1.10 (1.02-1.18)	0.009	A-T/G-G	0.96	Same
							rs56197924	DNMT3A	2	25503786	G/A	─	1.10 (1.02-1.18)	1.10 (1.02-1.18)	0.0092	A-G/G-A	0.97	Same
							rs57976122	DNMT3A	2	25506107	C/T	─	1.10 (1.02-1.18)	1.10 (1.02-1.18)	0.0094	A-C/G-T	0.96	Same
							rs56089703	DNMT3A	2	25500289	T/A	─	1.09 (1.02-1.17)	1.09 (1.02-1.17)	0.011	A-T/G-A	0.97	Same
		rs12946510	─	17q12	37912377	C/T	rs9747973	─	17	37905107	C/T	1.06 (0.98-1.14)	1.07 (1.02-1.13)	1.07 (1.02-1.12)	0.0024	C-T/T-C	0.83	Opposite
							rs907091	IKZF3	17	37921742	T/C	0.94 (0.90-0.98)	0.94 (0.89-0.98)	0.94 (0.90-0.98)	0.0043	C-T/T-C	0.8	Opposite
							rs4795397	─	17	38023745	A/G	0.93 (0.86-1.01)	0.95 (0.90-1.00)	0.94 (0.90-0.98)	0.0076	C-A/T-G	0.87	Opposite
							rs9905959	ZPBP2	17	38031138	A/G	0.94 (0.86-1.01)	0.95 (0.90-1.00)	0.95 (0.91-0.99)	0.011	C-A/T-G	0.85	Opposite
							rs59716545	ZPBP2	17	38031857	T/G	0.93 (0.86-1.01)	0.95 (0.91-1.00)	0.95 (0.91-0.99)	0.013	C-T/T-G	0.85	Opposite
		rs359457	─	5q35.2	173279842	T/C	rs359431	─	5	173288534	T/C	1.01 (0.93-1.10)	1.08 (1.02-1.13)	1.06 (1.01-1.10)	0.013	T-T/C-C	0.98	Opposite
							rs359456	─	5	173279808	C/T	1.00 (0.93-1.09)	1.08 (1.02-1.14)	1.06 (1.01-1.10)	0.015	T-C/C-T	1	Opposite
		rs798502	AMZ1, GNA12	7p22.3	2789880	A/C	rs798495	GNA12	7	2797267	T/C	0.95 (0.87-1.04)	0.92 (0.87-0.98)	0.93 (0.89-0.98)	0.0032	A-T/C-C	0.93	Same
							rs1182198	GNA12	7	2862906	C/T	0.93 (0.85-1.02)	0.93 (0.88-0.99)	0.93 (0.89-0.98)	0.0033	A-C/C-T	0.91	Same
							rs1182176	GNA12	7	2874601	A/G	0.94 (0.86-1.02)	0.93 (0.88-0.99)	0.93 (0.89-0.98)	0.0045	A-A/C-G	0.91	Same
							rs798526	GNA12	7	2775542	G/C	0.94 (0.86-1.03)	0.93 (0.88-0.98)	0.93 (0.89-0.98)	0.0047	A-G/C-C	0.94	Same
							rs798488	GNA12	7	2802522	T/C	0.95 (0.87-1.04)	0.93 (0.88-0.98)	0.93 (0.89-0.98)	0.0047	A-T/C-C	0.95	Same
		rs1182188	GNA12	7p22.2	2869985	T/C	rs798495	GNA12	7	2797267	T/C	0.95 (0.87-1.04)	0.92 (0.87-0.98)	0.93 (0.89-0.98)	0.0032	T-T/C-C	0.93	Same
							rs1182198	GNA12	7	2862906	C/T	0.93 (0.85-1.02)	0.93 (0.88-0.99)	0.93 (0.89-0.98)	0.0033	T-C/C-T	0.94	Same
							rs2644291	─	7	2890456	T/C	0.93 (0.86-1.02)	0.93 (0.88-0.99)	0.93 (0.89-0.98)	0.0041	T-T/C-C	0.84	Same
							rs1182176	GNA12	7	2874601	A/G	0.94 (0.86-1.02)	0.93 (0.88-0.99)	0.93 (0.89-0.98)	0.0045	T-A/C-G	0.99	Same
							rs798526	GNA12	7	2775542	G/C	0.94 (0.86-1.03)	0.93 (0.88-0.98)	0.93 (0.89-0.98)	0.0047	T-G/C-C	0.92	Same
		rs2413583	─	22q13.1	39659773	C/T	rs9611131	─	22	39662480	T/C	1.12 (1.00-1.25)	1.06 (0.99-1.14)	1.07 (1.01-1.14)	0.018	C-T/T-C	0.81	Opposite
							rs9607629	─	22	39670854	A/G	1.06 (0.95-1.18)	1.07 (1.00-1.14)	1.07 (1.01-1.13)	0.027	C-A/T-G	0.87	Opposite
		rs1049526	BRD2	6p21.32	32948804	T/C	rs3129305	─	6	32959180	C/G	1.06 (0.92-1.22)	1.11 (1.01-1.22)	1.10 (1.01-1.18)	0.021	T-C/C-G	0.98	─
		rs7517847	IL23R	1p31.3	67681669	T/G	rs11580078	IL23R	1	67669634	C/G	0.91 (0.84-0.99)	0.96 (0.91-1.01)	0.95 (0.91-0.99)	0.017	T-C/G-G	0.92	Same
							rs11576518	IL23R	1	67682196	G/A	0.92 (0.85-1.00)	0.97 (0.92-1.02)	0.95 (0.91-1.00)	0.033	T-G/G-A	1	Same
							rs2863210	IL23R	1	67670768	T/C	0.92 (0.85-1.00)	0.97 (0.92-1.02)	0.95 (0.91-1.00)	0.034	T-T/G-C	0.96	Same
							rs2019262	IL23R	1	67679990	G/A	0.92 (0.85-0.99)	0.97 (0.92-1.02)	0.95 (0.91-1.00)	0.037	T-G/G-A	1	Same
		rs7911264	─	10q23.33	94436851	C/T	rs11187128	─	10	94429708	G/T	1.08 (1.00-1.17)	1.05 (0.99-1.10)	1.06 (1.01-1.10)	0.014	C-T/T-G	0.89	Same
							rs10882100	─	10	94460687	G/C	0.92 (0.85-1.00)	0.97 (0.92-1.02)	0.95 (0.91-0.99)	0.025	C-G/T-C	0.98	Same
							rs10786052	─	10	94446635	C/T	0.92 (0.85-1.00)	0.97 (0.92-1.02)	0.96 (0.92-1.00)	0.039	C-C/T-T	1	Same
							rs2488087	─	10	94446041	G/A	0.92 (0.85-1.00)	0.97 (0.92-1.02)	0.96 (0.92-1.00)	0.041	C-G/T-A	1	Same
		rs9868809	CELSR3	3p21.31	48681053	C/T	rs34638686	CELSR3	3	48682658	C/T	0.97 (0.85-1.11)	0.88 (0.80-0.96)	0.91 (0.84-0.97)	0.0081	C-C/T-T	0.95	Opposite
							rs2310997	CELSR3	3	48678011	G/C	0.97 (0.85-1.11)	0.89 (0.82-0.97)	0.91 (0.85-0.98)	0.013	C-G/T-C	0.97	Opposite
							rs13096357	CELSR3	3	48675856	C/A	0.96 (0.84-1.10)	0.89 (0.82-0.97)	0.91 (0.85-0.98)	0.013	C-C/T-A	0.97	Opposite
							rs7620853	SLC26A6	3	48666503	G/A	0.97 (0.85-1.11)	0.89 (0.82-0.97)	0.92 (0.85-0.98)	0.016	C-G/T-A	0.97	Opposite
							rs34096717	NCKIPSD	3	48719453	A/C	0.97 (0.86-1.11)	0.90 (0.83-0.98)	0.92 (0.86-0.99)	0.02	C-A/T-C	0.92	Opposite
		rs2239802	HLA-DRA	6p21.32	32411846	G/C	rs3135387	─	6	32415109	G/T	1.01 (0.91-1.12)	0.91 (0.86-0.97)	0.94 (0.89-0.99)	0.029	G-G/C-T	0.93	─
							rs3135385	─	6	32416366	G/A	1.01 (0.91-1.11)	0.92 (0.86-0.98)	0.94 (0.90-1.00)	0.034	G-G/C-A	0.99	─
							rs3129888	HLA-DRA	6	32411726	A/G	1.01 (0.92-1.12)	0.92 (0.86-0.98)	0.95 (0.90-1.00)	0.043	G-A/C-G	0.94	─
							rs7197	HLA-DRA	6	32412580	C/T	1.01 (0.91-1.12)	0.92 (0.86-0.98)	0.94 (0.89-1.00)	0.046	G-C/C-T	0.82	─
							rs2395182	─	6	32413317	T/G	1.01 (0.92-1.11)	0.92 (0.87-0.98)	0.95 (0.90-1.00)	0.047	G-T/C-G	1	─
		rs2488389	DENND1B	1q31.3	197631141	G/A	rs11583319	DENND1B	1	197555860	A/G	0.92 (0.84-1.01)	0.94 (0.88-1.00)	0.93 (0.89-0.98)	0.0075	G-A/A-G	0.91	Opposite
							rs35939830	DENND1B	1	197561510	C/T	0.92 (0.84-1.02)	0.94 (0.89-1.00)	0.94 (0.89-0.98)	0.011	G-C/A-T	0.9	Opposite
							rs6702421	DENND1B	1	197559324	C/T	0.92 (0.84-1.02)	0.94 (0.89-1.00)	0.94 (0.89-0.99)	0.012	G-C/A-T	0.89	Opposite
							rs12118913	DENND1B	1	197512404	T/C	0.93 (0.85-1.03)	0.94 (0.88-1.00)	0.94 (0.89-0.99)	0.014	G-T/A-C	0.89	Opposite
							rs2042097	─	1	197471350	G/A	0.94 (0.85-1.03)	0.94 (0.89-1.00)	0.94 (0.89-0.99)	0.017	G-G/A-A	0.88	Opposite
		rs6499188	─	16q22.1	68674788	A/G	rs12447310	CDH3	16	68680280	C/G	1.12 (1.02-1.23)	1.04 (0.98-1.11)	1.07 (1.01-1.12)	0.012	A-C/G-G	0.97	Opposite
							rs2902324	CDH3	16	68675726	C/T	1.11 (1.02-1.22)	1.04 (0.98-1.10)	1.06 (1.01-1.11)	0.023	A-C/G-T	0.98	Opposite
							rs10153230	CDH3	16	68671741	C/G	1.12 (1.02-1.23)	1.04 (0.98-1.10)	1.06 (1.01-1.11)	0.023	A-C/G-G	0.99	Opposite
		rs254560	C5orf66	5q31.1	134443606	G/A	rs254559	C5orf66	5	134444982	C/A	1.05 (0.97-1.14)	1.05 (0.99-1.10)	1.05 (1.00-1.10)	0.036	G-C/A-A	0.99	Same
							rs254564	C5orf66	5	134439287	C/T	1.06 (0.98-1.15)	1.04 (0.99-1.10)	1.05 (1.00-1.10)	0.042	G-C/A-T	0.91	Same
							rs254570	C5orf66	5	134436352	G/A	1.07 (0.99-1.17)	1.03 (0.98-1.09)	1.05 (1.00-1.09)	0.046	G-G/A-A	0.84	Same
							rs254562	C5orf66	5	134441457	A/G	1.04 (0.96-1.13)	1.04 (0.99-1.10)	1.04 (1.00-1.09)	0.06	G-A/A-G	0.98	Same
		rs3766606	PARK7	1p36.23	8022197	G/T	rs35675666	PARK7	1	8021973	G/T	1.08 (0.97-1.20)	1.07 (1.00-1.15)	1.07 (1.01-1.14)	0.021	G-G/T-T	0.99	Opposite
							rs12740409	PARK7	1	8027830	A/C	1.09 (0.98-1.20)	1.06 (0.99-1.14)	1.07 (1.01-1.13)	0.024	G-A/T-C	0.99	Opposite
							rs34124834	PARK7	1	8028930	T/G	1.09 (0.98-1.20)	1.06 (0.99-1.14)	1.07 (1.01-1.13)	0.024	G-T/T-G	0.99	Opposite
							rs34157438	PARK7	1	8023586	C/T	1.08 (0.97-1.20)	1.06 (0.99-1.14)	1.07 (1.01-1.13)	0.028	G-C/T-T	0.99	Opposite
							rs7517357	PARK7	1	8025275	C/T	1.08 (0.97-1.20)	1.06 (0.99-1.14)	1.07 (1.01-1.13)	0.028	G-C/T-T	0.99	Opposite
		rs1250546	ZMIZ1	10q22.3	81032532	A/G	rs2802372	ZMIZ1	10	81047575	A/C	1.06 (0.98-1.15)	1.04 (0.99-1.10)	1.05 (1.00-1.10)	0.032	A-A/G-C	0.82	Opposite
							rs1250568	ZMIZ1	10	81045280	T/C	1.06 (0.98-1.15)	1.04 (0.99-1.10)	1.05 (1.00-1.09)	0.047	A-T/G-C	0.82	Opposite
							rs1108618	ZMIZ1	10	81043743	A/G	1.05 (0.97-1.14)	1.04 (0.98-1.09)	1.04 (1.00-1.09)	0.078	A-A/G-G	0.87	Opposite
							rs1108617	ZMIZ1	10	81043573	A/G	1.04 (0.96-1.13)	1.04 (0.98-1.09)	1.04 (0.99-1.09)	0.097	A-A/G-G	0.83	Opposite
							rs1250540	ZMIZ1	10	81036007	A/G	1.04 (0.96-1.13)	1.03 (0.97-1.09)	1.03 (0.99-1.08)	0.16	A-A/G-G	0.83	Opposite
		rs4656958	─	1q23.3	160856964	G/A	rs10797087	─	1	160877252	G/A	0.97 (0.89-1.05)	0.94 (0.89-0.99)	0.95 (0.90-0.99)	0.02	G-G/A-A	0.87	Same
							rs1930596	─	1	160876052	G/A	0.96 (0.88-1.05)	0.94 (0.89-0.99)	0.95 (0.90-0.99)	0.021	G-G/A-A	0.87	Same
							rs10908811	─	1	160878485	G/A	0.96 (0.88-1.05)	0.94 (0.89-0.99)	0.95 (0.90-0.99)	0.023	G-G/A-A	0.86	Same
							rs2225591	─	1	160875756	T/C	0.96 (0.88-1.05)	0.94 (0.89-1.00)	0.95 (0.91-0.99)	0.023	G-T/A-C	0.87	Same
							rs1810924	─	1	160880510	A/G	0.97 (0.89-1.05)	0.94 (0.89-0.99)	0.95 (0.91-0.99)	0.023	G-A/A-G	0.86	Same
		rs10521318	─	16q24.1	86011337	C/T	rs2361755	─	16	86009686	G/C	0.96 (0.83-1.12)	1.14 (1.03-1.25)	1.08 (1.00-1.17)	0.065	C-G/T-C	0.82	Opposite
		rs1734907	─	7q22.1	100315517	G/A	rs221792	GIGYF1	7	100278657	G/A	1.08 (0.97-1.20)	1.05 (0.98-1.13)	1.06 (1.00-1.12)	0.055	G-G/A-A	0.96	Same
							rs221789	GNB2	7	100271521	C/T	1.08 (0.97-1.20)	1.05 (0.98-1.12)	1.06 (1.00-1.12)	0.064	G-C/A-T	0.96	Same
							rs492430	─	7	100313099	G/T	1.06 (0.95-1.19)	1.05 (0.98-1.13)	1.05 (0.99-1.12)	0.08	G-G/A-T	0.99	Same
		rs1199103	─	10q21.1	59947231	A/G	rs2246537	─	10	59929697	T/G	0.94 (0.86-1.04)	0.95 (0.89-1.01)	0.95 (0.90-1.00)	0.054	─	─	─
							rs2790186	CISD1	10	60041914	G/T	0.94 (0.86-1.04)	0.92 (0.83-1.02)	0.93 (0.87 -1.00)	0.062	─	─	─
							rs9731951	─	10	59923346	A/G	0.95 (0.86-1.05)	0.95 (0.89-1.02)	0.95 (0.90 -1.01)	0.083	A-A/G-G	0.79	Same
							rs4405261	IPMK	10	59965514	G/A	0.95 (0.86-1.05)	0.96 (0.90-1.03)	0.96 (0.91 -1.01)	0.15	A-G/G-A	0.88	Same
		rs917997	─	2q12.1	103070568	C/T	rs2075185	─	2	103070988	G/A	1.07 (0.97-1.17)	1.04 (0.98-1.10)	1.05 (1.00-1.10)	0.071	─	─	─
		rs10495903	THADA	2p21	43806918	C/T	rs80075345	THADA	2	43810698	C/T	1.14 (1.02-1.28)	1.06 (0.98-1.14)	1.08 (1.02-1.15)	0.015	C-C/T-T	0.98	Same
							rs74501107	THADA	2	43806012	A/C	1.14 (1.02-1.28)	1.05 (0.98-1.13)	1.08 (1.01-1.15)	0.017	─	─	─
							rs76621120	THADA	2	43810651	G/A	1.14 (1.02-1.28)	1.05 (0.98-1.13)	1.08 (1.01-1.15)	0.019	C-G/T-A	0.99	Same
							rs79388962	THADA	2	43807561	T/C	1.15 (1.02-1.29)	1.05 (0.97-1.13)	1.08 (1.01-1.15)	0.02	C-T/T-C	0.97	Same
							rs76501189	THADA	2	43806353	C/T	1.14 (1.01-1.27)	1.05 (0.98-1.13)	1.08 (1.01-1.15)	0.021	C-C/T-T	0.99	Same
		rs4077515	CARD9	9q34.3	139266496	C/T	rs10781507	SNAPC4	9	139272058	A/G	1.02 (0.94-1.11)	1.06 (1.00-1.11)	1.05 (1.00-1.09)	0.043	C-A/T-G	0.97	Same
							rs4266763	SNAPC4	9	139289825	A/G	1.01 (0.93-1.10)	1.06 (1.01-1.12)	1.05 (1.00-1.09)	0.049	C-A/T-G	0.97	Same
							rs10781496	CARD9	9	139261086	A/G	1.03 (0.95-1.12)	1.05 (1.00-1.11)	1.05 (1.00-1.09)	0.049	C-A/T-G	0.89	Same
							rs10781505	SNAPC4	9	139271355	T/C	1.01 (0.93-1.10)	1.06 (1.00-1.11)	1.04 (1.00-1.09)	0.05	C-T/T-C	0.87	Same
							rs35670379	SNAPC4	9	139270606	T/C	1.01 (0.93-1.10)	1.06 (1.00-1.11)	1.04 (1.00-1.09)	0.051	C-T/T-C	0.86	Same
	Celiac disease	rs13098911	─	3p21.31	46235201	C/T	rs1542756	CCR3	3	46272162	G/T	0.87 (0.75-1.01)	0.92 (0.83-1.01)	0.90 (0.83-0.98)	0.015	C-G/T-T	0.82	Opposite
							rs71615440	CCR3	3	46268536	A/T	0.86 (0.74-1.00)	0.92 (0.83-1.02)	0.90 (0.83-0.98)	0.017	─	─	─
							rs35178150	─	3	46194769	G/A	0.89 (0.77-1.03)	0.92 (0.84-1.01)	0.91 (0.84-0.98)	0.019	─	─	─
							rs143975805	CCR3	3	46222236	C/T	0.91 (0.79-1.04)	0.92 (0.84-1.01)	0.92 (0.85-0.99)	0.032	C-C/T-T	0.94	Opposite
							rs35960950	─	3	46199680	G/C	0.92 (0.80-1.05)	0.93 (0.85-1.02)	0.92 (0.86-1.00)	0.046	─	─	─
		rs10903122	─	1p36.11	25303576	G/A	rs10751776	RP11-84D1.2	1	25296743	C/A	0.88 (0.81-0.95)	0.97 (0.92-1.02)	0.94 (0.90-0.99)	0.0097	G-C/A-A	0.96	Same
							rs10751775	RP11-84D1.2	1	25296478	C/T	0.88 (0.81-0.95)	0.97 (0.93-1.03)	0.94 (0.90-0.99)	0.0099	G-C/A-T	0.96	Same
							rs7550635	─	1	25299637	C/G	1.13 (1.05-1.23)	1.03 (0.98-1.08)	1.06 (1.01-1.10)	0.011	G-G/A-C	0.98	Same
							rs6672420	RUNX3	1	25291010	A/T	1.12 (1.03-1.22)	1.03 (0.98-1.09)	1.06 (1.01-1.11)	0.012	G-T/A-A	0.9	Same
							rs2370233	─	1	25304463	G/C	1.13 (1.05-1.23)	1.03 (0.97-1.08)	1.06 (1.01-1.10)	0.013	G-C/A-G	0.98	Same
		rs9792269	─	8q24.21	129264589	A/G	rs9792320	─	8	129265059	G/A	1.04 (0.94-1.14)	1.06 (1.00-1.13)	1.05 (1.00-1.11)	0.056	A-G/G-A	0.92	Opposite
							rs9792159	─	8	129268583	A/G	1.03 (0.94-1.13)	1.06 (0.99-1.12)	1.05 (1.00-1.10)	0.065	A-A/G-G	1	Opposite
		rs917997	─	2q12.1	103070568	C/T	rs2075185	─	2	103070988	G/A	1.07 (0.97-1.17)	1.04 (0.98-1.10)	1.05 (1.00-1.10)	0.071	─	─	─
		rs1464510	LPP	3q28	188112554	C/A	rs9848000	LPP	3	188102421	A/T	1.08 (1.00-1.17)	1.04 (0.99-1.10)	1.05 (1.01-1.10)	0.018	─	─	─
							rs13079689	LPP	3	188102112	A/T	0.93 (0.85-1.00)	0.96 (0.91-1.01)	0.95 (0.91-0.99)	0.02	─	─	─
							rs6780858	LPP	3	188132110	G/A	0.92 (0.85-1.00)	0.97 (0.92-1.02)	0.95 (0.91-0.99)	0.025	─	─	─
							rs13080163	LPP	3	188102104	G/T	0.92 (0.84-0.99)	0.97 (0.92-1.02)	0.95 (0.91-1.00)	0.036	─	─	─
	Chronic pancreatitis	rs8055167	CTRB1, CTRB2	16q23.1	75254889	C/T	rs8051363	CTRB1, CTRB2	16	75255217	G/A	1.08 (0.98-1.18)	1.19 (1.13-1.26)	1.16 (1.11-1.22)	1.4 × 10-9	C-G/T-A	0.84	─
	Primary sclerosing cholangitis	rs3197999	MST1	3p21.31	49721532	G/A	rs9836291	BSN	3	49697459	G/A	0.98 (0.90-1.07)	0.90 (0.85-0.96)	0.93 (0.88-0.97)	0.0012	G-G/A-A	0.95	Opposite
							rs7614725	BSN	3	49650395	G/A	0.97 (0.89-1.05)	0.91 (0.86-0.96)	0.93 (0.88-0.97)	0.0013	G-G/A-A	0.92	Opposite
							rs11917431	BSN	3	49644012	C/T	0.97 (0.89-1.05)	0.91 (0.86-0.96)	0.93 (0.88-0.97)	0.0013	G-C/A-T	0.92	Opposite
							rs7630869	DAG1	3	49522543	C/T	0.97 (0.89-1.05)	0.91 (0.86-0.97)	0.93 (0.89-0.97)	0.0017	G-C/A-T	0.89	Opposite
							rs13062429	DAG1	3	49559485	G/A	0.96 (0.89-1.05)	0.91 (0.87-0.97)	0.93 (0.89-0.97)	0.0018	G-G/A-A	0.89	Opposite
	Abbreviations: Chr., chromosome; CI, confidence interval; LD, linkage disequilibrium; OR, odds ratio; PDAC, pancreatic ductal adenocarcinoma; sARTP, summary data-based adaptive rank truncated product; SNP, single-nucleotide polymorphism.
	a The analysis (N=8,384 cases and 11,955 controls) was adjusted for age, sex, study, geographic region, and the top eigenvectors for the PanScan studies and age, sex, and the top eigenvectors for the PanC4 studies.
	b SNP position according to NCBI Human Genome Build 37.
	c Reference allele/minor allele. The risk increasing allele is highlighted in bold.
	d Cohort studies included PanScan Ⅰ and PanScan Ⅲ cohort studies.
	e Case-control studies included PanScan Ⅰ, PanScan Ⅱ and PanC4 case-control studies.
	f For each GWAS phase, unconditional logistic regression was used to calculate odds ratios (OR) and 95% confidence intervals (CI) with the major allele as the referent, adjusting for age (10-year categories, (≤50, 51-60, 61-70, 71-80, and ≥81)), sex, study, geographic region, and the top eigenvectors.
	g Results for pairwise LD analysis were obtained from NCI LDlink EUR population data.
	h Haplotype was examined between the alleles of index-SNP and sARTP-selected SNP. Alleles that in LD with each other are shown.
	i Direction of association between the index-SNP and sARTP-selected SNP. "Same" means the correlated alleles between the two SNPs confer disease susceptibility in the same direction.

## Sheet: Supp. Table S5
	Supplementary Table S5. Expression quantitative trait loci (eQTL) for select index-SNP and their corresponding sARTP-selected SNPs (P-value ≤ 0.002) in normal gastrointestinal tissues and blood from GTExa
	SNP ID	Index-SNP or sARTP-selected SNP	Ref. allele	Alt. allele	Pancreas (n=305)		Colon-Sigmoid (n=318)		Colon-Transverse (n=368)		Small Intestine-Terminal Ileum (n=174)		Esophagus-Mucosa (n=497)		Esophagus-GEJ (n=330)		Stomach (n=324)		Whole Blood (n=670)
					Geneb	P-value	Gene	P-value	Gene	P-value	Gene	P-value	Gene	P-value	Gene	P-value	Gene	P-value	Gene	P-value
	Chromosome 3p21.31
	rs9858542	Index-SNP	G	A	UBA7 ↑	2.4e-09	RBM6 ↑	2.6e-09	UBA7 ↑	1.2e-12	UBA7 ↑	5.5e-06	RBM6 ↑	1.6e-21	RBM6 ↑	3.7e-12	RBM6 ↑	1.2e-08	RBM6 ↑	2.5e-17
					RBM6 ↑	3.9e-07	RNF123 ↓	2.9e-09	RBM6 ↑	2.9e-11	RBM6 ↑	4.6e-05	UBA7 ↑	2.7e-12	RNF123 ↓	1.8e-05	UBA7 ↑	1.2e-06	UBA7 ↑	2.8e-16
					RNF123 ↓	2.8e-06			RNF123 ↓	1.3e-05	RNF123 ↓	9.4e-05	RNF123 ↓	8.2e-05
	rs9822268	Index-SNP	G	A	UBA7 ↑	7.4e-10	RBM6 ↑	1.1e-10	UBA7 ↑	6.9e-13	UBA7 ↑	6e-06	RBM6 ↑	6.5e-23	RBM6 ↑	6.3e-13	RBM6 ↑	1.9e-09	RBM6 ↑	4.9e-17
					RBM6 ↑	1.3e-07	RNF123 ↓	2.8e-09	RBM6 ↑	7.7e-12	RBM6 ↑	2.4e-05	UBA7 ↑	1.9e-11	RNF123 ↓	1.9e-05	UBA7 ↑	4.2e-07	UBA7 ↑	4.6e-15
					RNF123 ↓	7.3e-06			RNF123 ↓	1.6e-05			RNF123 ↓	0.00015
	rs3197999	Index-SNP	G	A	UBA7 ↑	2.7e-09	RBM6 ↑	3e-09	UBA7 ↑	1.2e-12	UBA7 ↑	3.9e-06	RBM6 ↑	3.6e-21	RBM6 ↑	3.4e-12	RBM6 ↑	2.8e-08	UBA7 ↑	2e-16
					RBM6 ↑	4.2e-07	RNF123 ↓	6.8e-09	RBM6 ↑	8.3e-11	RBM6 ↑	3.9e-05	UBA7 ↑	1.1e-12	RNF123 ↓	1.3e-05	UBA7 ↑	4.7e-06	RBM6 ↑	1.1e-15
					RNF123 ↓	1e-05			RNF123 ↓	1.3e-05	RNF123 ↓	0.00012	RNF123 ↓	0.00012
	rs9836291	sARTP-selected SNP	G	A	UBA7 ↑	1.2e-09	RBM6 ↑	5.5e-11	UBA7 ↑	2.8e-13	UBA7 ↑	6e-06	RBM6 ↑	1.1e-22	RBM6 ↑	6.3e-13	RBM6 ↑	2e-09	RBM6 ↑	8.5e-17
					RBM6 ↑	4.2e-07	RNF123 ↓	9.4e-09	RBM6 ↑	3.9e-12	RBM6 ↑	2.4e-05	UBA7 ↑	9.1e-12	RNF123 ↓	1.9e-05	UBA7 ↑	4.5e-07	UBA7 ↑	5.7e-15
					RNF123 ↓	4.1e-05			RNF123 ↓	2.2e-05			RNF123 ↓	0.00017
	rs7614725	sARTP-selected SNP	G	A	UBA7 ↑	9e-10	RBM6 ↑	2e-10	UBA7 ↑	5.5e-13	UBA7 ↑	1.5e-05	RBM6 ↑	2.2e-23	RBM6 ↑	1.4e-12	RBM6 ↑	3e-09	RBM6 ↑	6.4e-18
					RBM6 ↑	2.4e-07	RNF123 ↓	2.4e-09	RBM6 ↑	6.9e-12	RBM6 ↑	5.4e-05	UBA7 ↑	2.1e-11	RNF123 ↓	1.1e-05	UBA7 ↑	8.1e-07	UBA7 ↑	1e-14
					RNF123 ↓	9.9e-06			RNF123 ↓	7.2e-06			RNF123 ↓	4.4e-05
	rs11917431	sARTP-selected SNP	C	T	UBA7 ↑	1.1e-09	RNF123 ↓	4.2e-09	UBA7 ↑	9.6e-13	UBA7 ↑	1.8e-05	RBM6 ↑	5.4e-22	RBM6 ↑	8.4e-12	RBM6 ↑	2e-08	RBM6 ↑	5.7e-18
					RBM6 ↑	2.7e-07	RBM6 ↑	6.2e-09	RBM6 ↑	2.6e-11	RBM6 ↑	0.00012	UBA7 ↑	2.9e-12	RNF123 ↓	1e-05	UBA7 ↑	2.4e-06	UBA7 ↑	1.2e-15
					RNF123 ↓	3.2e-06			RNF123 ↓	5.5e-06			RNF123 ↓	2.2e-05
	rs7630869	sARTP-selected SNP	C	T	UBA7 ↑	4.9e-09	RNF123 ↓	2.1e-09	UBA7 ↑	1.2e-13	UBA7 ↑	1.1e-05	RBM6 ↑	1e-19	RBM6 ↑	3e-10	RBM6 ↑	1.3e-07	UBA7 ↑	7.1e-18
					RBM6 ↑	8.9e-08	RBM6 ↑	6.3e-09	RBM6 ↑	3.4e-10	RNF123 ↓	0.00011	UBA7 ↑	8.4e-12	RNF123 ↓	3e-06	UBA7 ↑	4.5e-07	RBM6 ↑	4.5e-17
					RNF123 ↓	4.8e-05			RNF123 ↓	9.9e-07	RBM6 ↑	0.00017	RNF123 ↓	3.9e-05
					GMPPB ↓	0.00036
	rs13062429	sARTP-selected SNP	A	G	UBA7 ↓	6.2e-08	RNF123 ↑	1.4e-10	UBA7 ↓	3.3e-13	RNF123 ↑	5.8e-05	RBM6 ↓	8.5e-19	RBM6 ↓	2.2e-10	RBM6 ↓	2.7e-07	UBA7 ↓	1.8e-16
					RBM6 ↓	1.9e-07	RBM6 ↓	4.5e-09	RBM6 ↓	6e-11	UBA7 ↓	8.5e-05	UBA7 ↓	1.6e-11	RNF123 ↑	4e-06	UBA7 ↓	7.3e-06	RBM6 ↓	5.7e-16
					RNF123 ↑	1.7e-05			RNF123 ↑	1.1e-06			RNF123 ↑	2.1e-05
					GMPPB ↑	0.00025
	Chromosome 16q23.1
	rs8055167	Index-SNP	T	C	CTRB2 ↓	3.4e-17	RP11-331F4.5 ↑	7.8e-12	RP11-331F4.5 ↑	1.8e-24	RP11-331F4.5 ↑	1.1e-07	RP11-331F4.5 ↑	1.5e-24	RP11-331F4.5 ↑	1.2e-27	RP11-331F4.5 ↑	5.5e-28	─	─
					CTRB1 ↑	2e-06
					RP11-331F4.5 ↑	2e-06
					RP11-331F4.4 ↑	1.2e-05
	rs8051363	sARTP-selected SNP	A	G	CTRB2 ↓	2.3e-16	RP11-331F4.5 ↑	2e-12	RP11-331F4.5 ↑	6.7e-26	RP11-331F4.5 ↑	3e-08	RP11-331F4.5 ↑	2.3e-22	RP11-331F4.5 ↑	3.8e-29	RP11-331F4.5 ↑	3.6e-27	─	─
					CTRB1 ↑	2e-08
					RP11-331F4.4 ↑	1.4e-07
					RP11-331F4.5 ↑	2e-06
	Chromosome 17q21.1
	rs2872507	Index-SNP	G	A	PGAP3 ↓	5.6e-10	GSDMA ↑	2.1e-12	GSDMA ↑	7.1e-11	PGAP3 ↓	2.5e-07	─	─	GSDMA ↑	2.8e-09	PGAP3 ↓	1.4e-08	GSDMA ↓	5.1e-05
					GSDMA ↑	5.2e-06			PGAP3 ↓	2.8e-08					PGAP3 ↓	6.2e-05	GSDMA ↑	1.7e-07
	rs12936231	sARTP-selected SNP	C	G	PGAP3 ↓	1.3e-08	GSDMA ↑	4e-10	GSDMA ↑	5e-10	PGAP3 ↓	2.5e-07	─	─	GSDMA ↑	6.4e-08	PGAP3 ↓	3.8e-09	─	─
					GSDMA ↑	8e-05			PGAP3 ↓	3e-09	GSDMA ↑	2.7e-05			PGAP3 ↓	4.4e-05	GSDMA ↑	1.8e-07
	rs1453559	sARTP-selected SNP	T	C	PGAP3 ↓	1.1e-09	─	─	PGAP3 ↓	3.2e-09	PGAP3 ↓	1.8e-07	─	─	PGAP3 ↓	2.6e-05	PGAP3 ↓	3.6e-09	─	─
	rs11658278	sARTP-selected SNP	T	C	PGAP3 ↓	3.4e-10	─	─	PGAP3 ↓	8.2e-10	PGAP3 ↓	3.8e-08	─	─	PGAP3 ↓	8.6e-05	PGAP3 ↓	2.6e-11	─	─
	rs9903250	sARTP-selected SNP	G	A	PGAP3 ↓	2.9e-11	─	─	PGAP3 ↓	2.1e-10	PGAP3 ↓	7.9e-08	─	─	PGAP3 ↓	2e-05	PGAP3 ↓	2.8e-13	─	─
	rs12950209	sARTP-selected SNP	T	C	PGAP3 ↓	2e-10	─	─	PGAP3 ↓	2.7e-10	PGAP3 ↓	4.4e-08	─	─	PGAP3 ↓	3.5e-05	PGAP3 ↓	3e-11	─	─
	Abbreviations: Alt., alternative; eQTL, expression quantitative trait loci; GEJ, gastroesophageal junction; Ref., reference; sARTP, summary data-based adaptive rank truncated product; SNP, single-nucleotide polymorphism; TSS, transcription start site.
	a cis-acting eQTLs were examined by using +/- 1 Mb cis-window around a gene’s TSS.
	b Arrows denotes the directional effect for the alternative allele relative to the reference allele. "↑" means increased mRNA level or positive effect on the gene; "↓" means decreased mRNA level or negative effect on the gene.

## Sheet: Supp. Table S6
	Supplementary Table S6. Functional annotations of select index-SNPsa
	Index-SNP	Chr.	Ref. allele	Alt. allele	ORb	95% CI lower	95% CI higher	P-value	Coding annotationc	RegulomeDB score	Regulatory functiond	SNPs in LD
	rs9858542	3	G	A	0.93	0.89	0.97	0.00089	BSN, synonymous	1f	Potential eQTL SNP in multiple tissues. H3K4me1 enhancer mark in colon, esophagus, pancreas and other tissues (n=29).	rs34762726 (r2 = 0.99), which causes a missense mutation in BSN.
	rs9822268	3	G	A	0.93	0.89	0.97	0.00085	APEH, intronic	3a	Potential eQTL SNP in multiple tissues. No data available for chromatin state or histone modification mark in pancreas.	rs11130213 (r2 =1) within APEH. Either resides in or flanks active TSS in pancreas and digestive tissues. Bound to YY1 and ZEB1 transcription factors.
	rs3197999	3	G	A	0.93	0.89	0.97	0.0013	MST1, missense	5	Potential eQTL SNP in multiple tissues. H3K4me1 enhancer mark in colon and other tissues (n=14).	rs9823546 (r2 =0.89) within BSN. Resides in active enhancer in pancreas, and other tissues (22). H3K4me1 enhancer marks in esophagus, pancreas and multiple tissues.
	rs8055167	16	C	T	1.14	1.09	1.19	2.28429e-08	CTRB1, intronic	6	Potential eQTL SNP in multiple tissues. Resides in active TSS in pancreas. H3K4me1 enhancer mark in small intestine and pancreas. H3K4me3 promoter mark in pancreas. H3K27ac enhancer mark in pancreas.	rs8045196 (r2 = 0.81) within CTRB1. Resides in active TSS in pancreas. H3K4me3 promoter mark, H3K27ac enhancer mark, and DNase Ⅰ hypersensitivity site in pancreas. Bound to MAX transcription factor.
	rs2872507	17	G	A	0.94	0.91	0.98	0.0068	6.6kb 3' of ZPBP2	6	Potential eQTL SNP in multiple tissues. No data available for chromatin state or histone modification mark in pancreas and tissues of digestive organs.	rs11557466 (r2 = 0.99) within ZPBP2. H3K4me1 enhancer mark in small intestine, colon, pancreas. H3K4me3 promoter mark in colon. Bound to POL2 transcription factor.
	Abbreviations: Alt., alternative; Chr., chromosome; CI, confidence interval; eQTL, expression quantitative trait loci; LD, linkage disequilibrium; OR, odds ratio; PDAC, pancreatic ductal adenocarcinoma; Ref., reference; sARTP, summary data-based adaptive rank truncated product; SNP, single-nucleotide polymorphism; TSS, transcription start site.
	a Only index-SNPs whose corresponding sARTP-selected SNPs show the strongest association with PDAC (P-value ≤ 0.002) are presented in the table.
	b For each GWAS phase, unconditional logistic regression was used to calculate odds ratios (OR) and 95% confidence intervals (CI) with the major allele as the referent, adjusting for age (10-year categories, (≤50, 51-60, 61-70, 71-80, and ≥81)), sex, study, geographic region, and the top eigenvectors.
	c Coding and non-coding annotation for the location (GRCh37) of each SNP were evaluated using Ensembl.
	d Information about chromatin states (Core 15-state model (5 marks, 127 epigenomes)), histone modification marks, transcription factor binding to DNA, and DNase Ⅰ hypersensitivity sites were identified using RegulomeDB v1.1 (http://www.regulomedb.org) and Haploreg v4.1 (https://pubs.broadinstitute.org/mammals/haploreg/haploreg.php).

## Sheet: Supp. Table S7
	Supplementary Table S7. Functional annotations of top ranked PDAC-associated SNPs (P-value ≤ 0.002) selected by sARTP
	sARTP-selected SNP	Chr.	Ref. allele	Alt. allele	ORa	95% CI lower	95% CI higher	P-value	Coding annotationb	RegulomeDB score	Regulatory functionc	SNPs in LD
	Index-SNP rs9858542 (Inflammatory bowel disease and Crohn's disease pathways)
	Index-SNP rs9822268 (Ulcerative colitis pathway)
	Index-SNP rs3197999 (Primary sclerosing cholangitis pathway)
	rs9836291	3	G	A	0.93	0.88	0.97	0.0012	BSN, intronic variant	5	Potential eQTL SNP in multiple tissues. Resides in active enhancer in pancreas. H3K4me1 enhancer mark in pancreas and other tissues (n=11).	rs34762726 (r2 = 0.99), which causes a missense mutation in BSN.
	rs7614725	3	G	A	0.93	0.88	0.97	0.0013	BSN, intronic variant	─	Potential eQTL SNP in multiple tissues. No data available for chromatin state or histone modification mark in pancreas.	rs11130213 (r2 =0.88) within APEH. Either resides in or flanks active TSS in pancreas and digestive tissues. Bound to YY1 and ZEB1 transcription factors.
	rs11917431	3	C	T	0.93	0.88	0.97	0.0013	BSN, intronic variant	5	Potential eQTL SNP in multiple tissues. Resides in active enhancer in pancreas, stomach, espophagus and other tissues (n=12). H3K4me1 enhancer mark in pancreas, colon and other tissues (n=27).	─
	rs7630869	3	C	T	0.93	0.89	0.97	0.0017	DAG1, intronic variant	5	Potential eQTL SNP in multiple tissues. Resides in active enhancer in pancreas, and other tissues (n=28). H3K4me1 and H3K27ac enhancer marks in pancreas and multiple tissues.	rs6766131 (r2 = 0.99) within DAG1. Resides in active enhancer in multiple digestive tissues. Bound to GATA1 transcription factor.
	rs13062429	3	G	A	0.93	0.89	0.97	0.0018	DAG1, intronic variant	─	Potential eQTL SNP in multiple tissues. H3K4me1 enhancer mark in colon and H3K9ac promoter mark in stomach. No data available for chromatin state or histone modification mark in pancreas.	In LD with rs7630869 (r2 =0.89).
	Index SNP rs8055167 (Chronic pancreatitis pathway)
	rs8051363	16	G	A	1.16	1.11	1.22	1.4 × 10-9	CTRB1, intronic variant	5	Potential eQTL SNP in multiple tissues. Resides in active TSS in pancreas. H3K4me3 promoter mark and H3K27ac enhancer mark in pancreas. Located in DNase Ⅰ hypersensitivity site in pancreas.	rs8045196 (r2 = 0.94) within CTRB1. Resides in active TSS in pancreas. H3K4me3 promoter mark, H3K27ac enhancer mark, and DNase Ⅰ hypersensitivity site in pancreas. Bound to MAX transcription factor.
	Index-SNP rs2872507 (Inflammatory bowel disease, Ulcerative colitis, and Crohn's disease pathway)
	rs12936231	17	C	G	0.93	0.89	0.97	0.0012	ZPBP2, intronic variant	1f	Potential eQTL SNP in multiple tissues. Quiescent/Low chromatin state in pancreas and digestive tissues. Bound to six transcription factors.	rs11557467 (r2 = 0.97), which causes a missense mutation in ZPBP2.
	rs1453559	17	C	T	1.07	1.03	1.12	0.0017	IKZF3, 5' UTR	4	Potential eQTL SNP in multiple tissues. Resides in active enhancer in pancreas, and in active TSS in blood (T cells), thymus, spleen and other tissues. Bound to 30 transcription factors.	rs11557467 (r2 = 0.94), which results in a misense mutation in ZPBP2.
	rs11658278	17	T	C	0.93	0.89	0.97	0.0017	ZPBP2, intronic variant	─	Potential eQTL SNP in multiple tissues. No data available for chromatin state or histone modification mark in pancreas.	rs2941522 (r2 = 0.67) located 3.6kb 3' of RP11-94L15.2. Resides in active TSS in blood (T cells), thymus, spleen, disgestive tissues. Flanks active TSS in pancreas. Bound to 11 transcription factor.
	rs9903250	17	G	A	0.93	0.89	0.97	0.0018	ZPBP2, intronic variant	─	Potential eQTL SNP in multiple tissues. No data available for chromatin state or histone modification mark in pancreas.	In LD with rs2941522 (r2 = 0.73).
	rs12950209	17	T	C	0.93	0.9	0.98	0.002	12kb 3' of GSDMB	─	Potential eQTL SNP in multiple tissues. No data available for chromatin state or histone modification mark in pancreas.	In LD with rs2941522 (r2 = 0.73).
	Abbreviations: Alt., alternative; Chr., chromosome; CI, confidence interval; eQTL, expression quantitative trait loci; LD, linkage disequilibrium; OR, odds ratio; PDAC, pancreatic ductal adenocarcinoma; Ref., reference; sARTP, summary data-based adaptive rank truncated product; SNP, single-nucleotide polymorphism; TSS, transcription start site.
	a For each GWAS phase, unconditional logistic regression was used to calculate odds ratios (OR) and 95% confidence intervals (CI) with the major allele as the referent, adjusting for age (10-year categories, (≤50, 51-60, 61-70, 71-80, and ≥81)), sex, study, geographic region, and the top eigenvectors.
	b Coding and non-coding annotation for the location (GRCh37) of each SNP were evaluated using Ensembl.
	c Information about chromatin states (Core 15-state model (5 marks, 127 epigenomes)), histone modification marks, transcription factor binding to DNA, and DNase Ⅰ hypersensitivity sites were identified using RegulomeDB v1.1 (http://www.regulomedb.org) and Haploreg v4.1 (https://pubs.broadinstitute.org/mammals/haploreg/haploreg.php).
